# Supplementary material for: Transcriptome Sequencing Reveals Wide Expression Reprogramming of Basal and Unknown Genes in Leptospira biflexa Biofilms
Source: PubMed Central journal article supplement (PMC4863578; doi:10.1128/msphere.00042-16), 2016-04-06

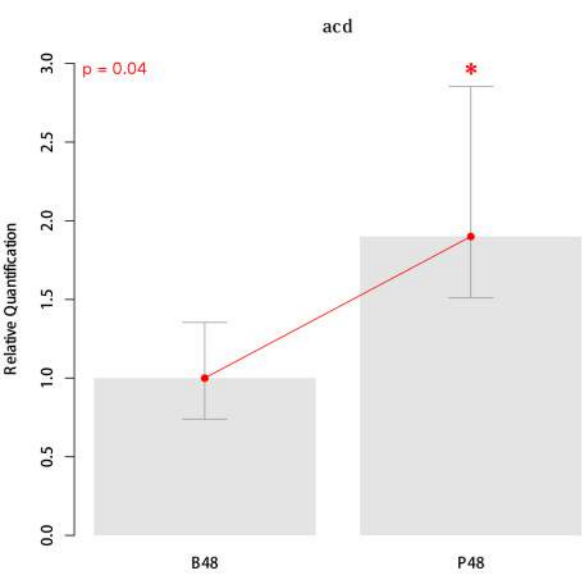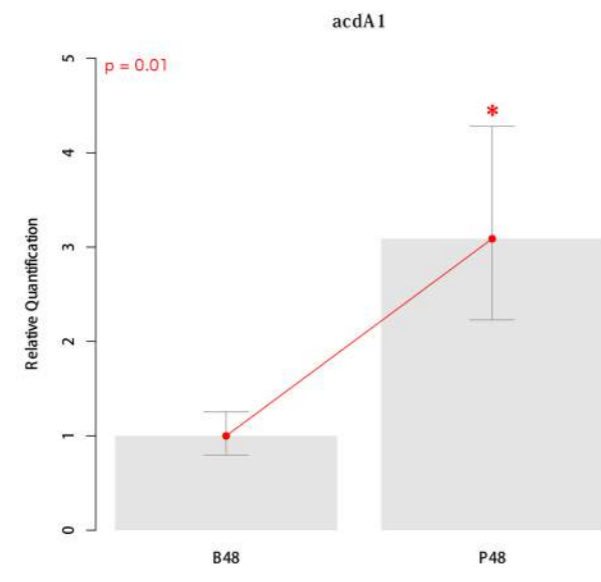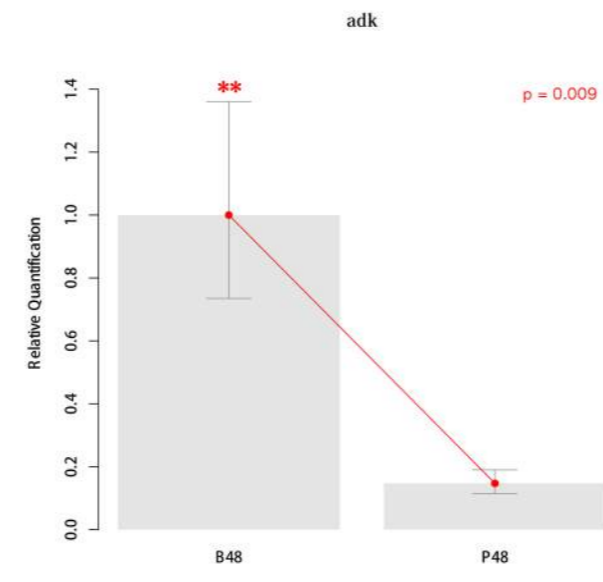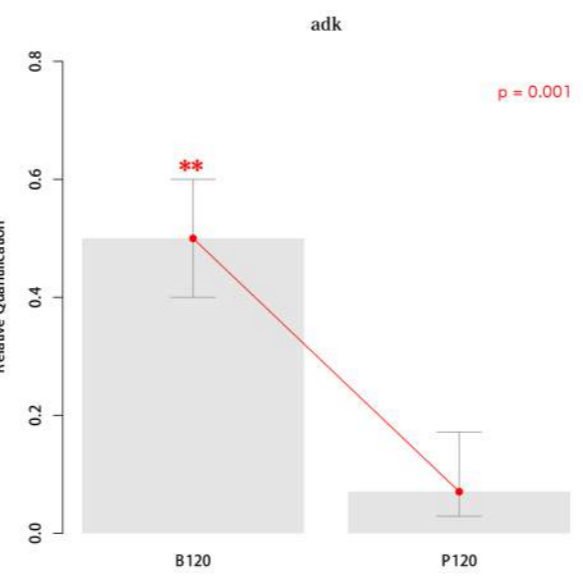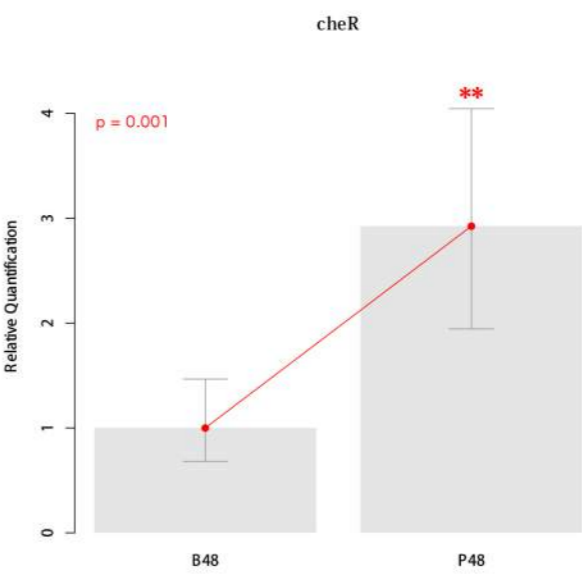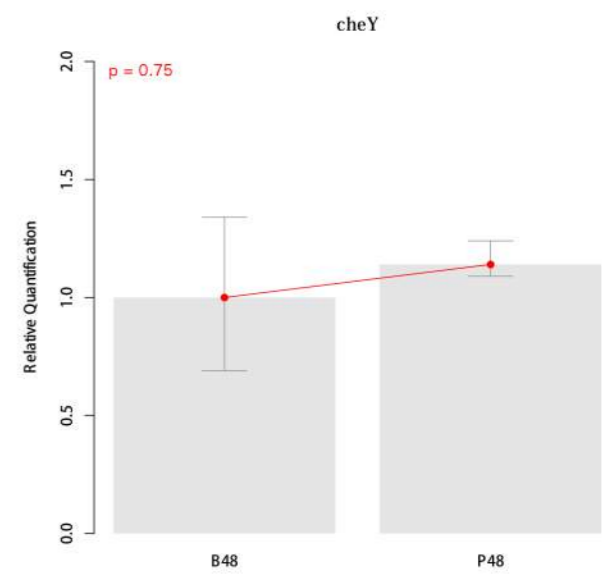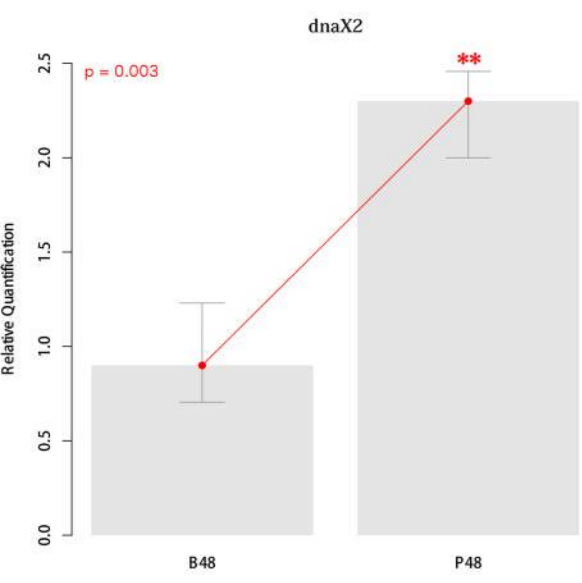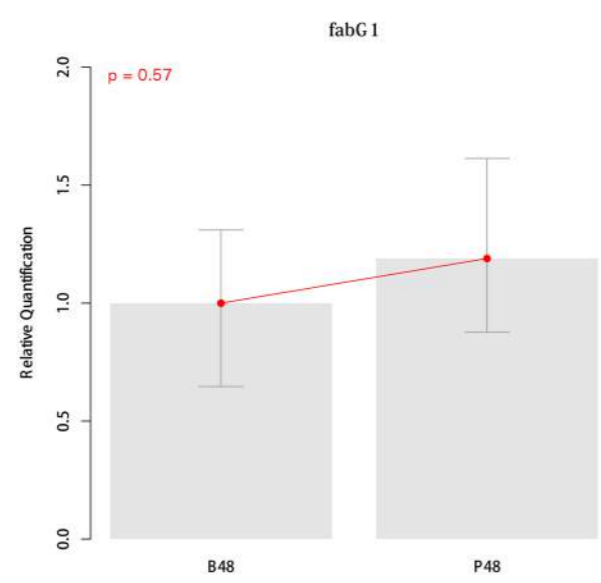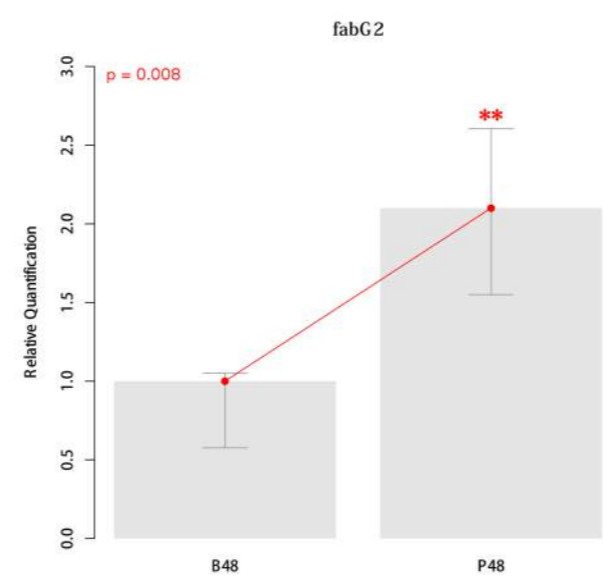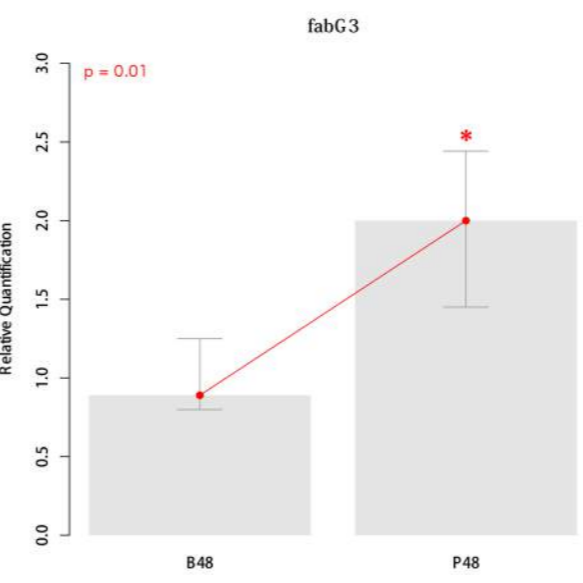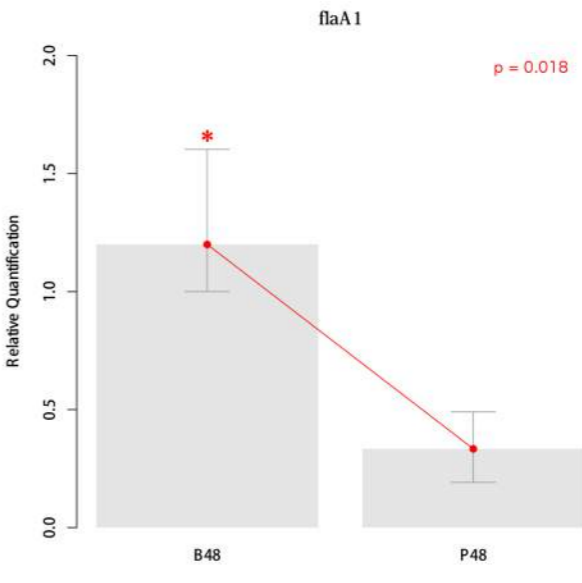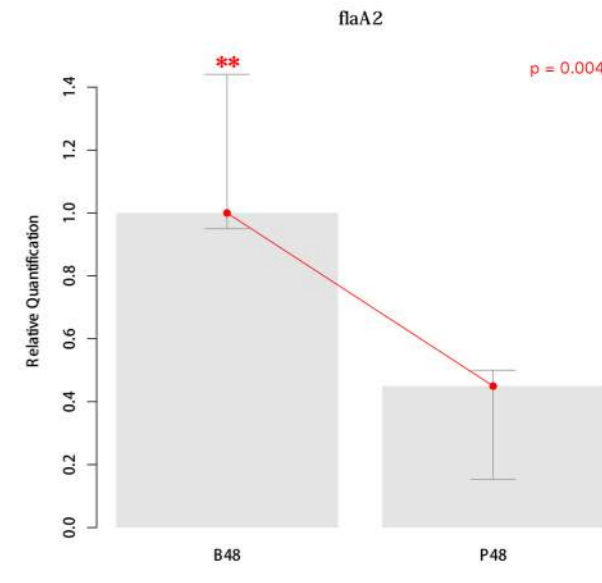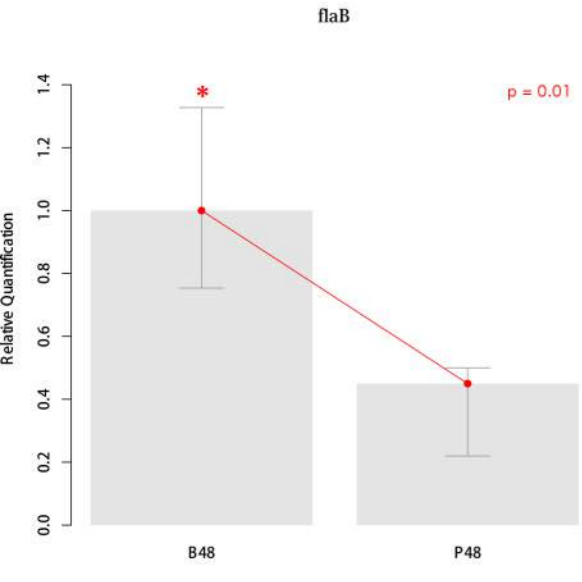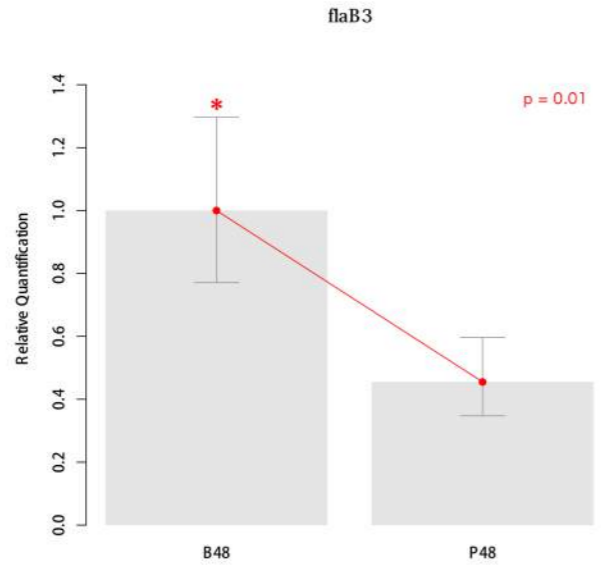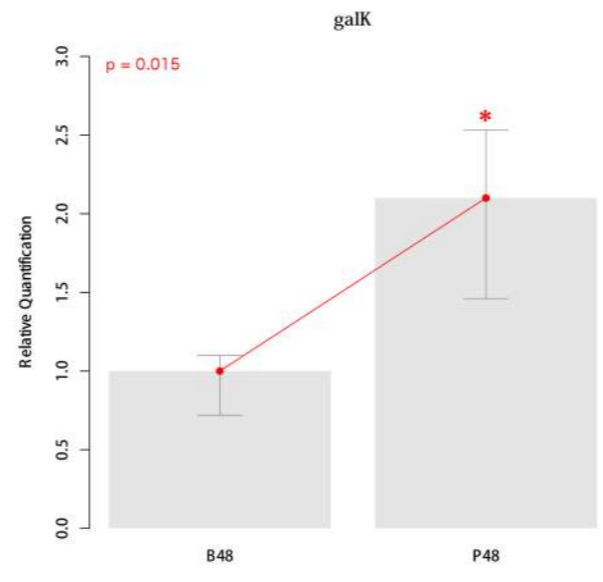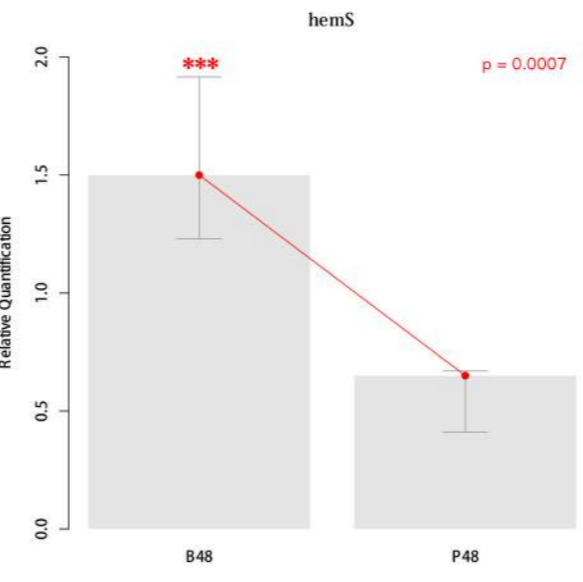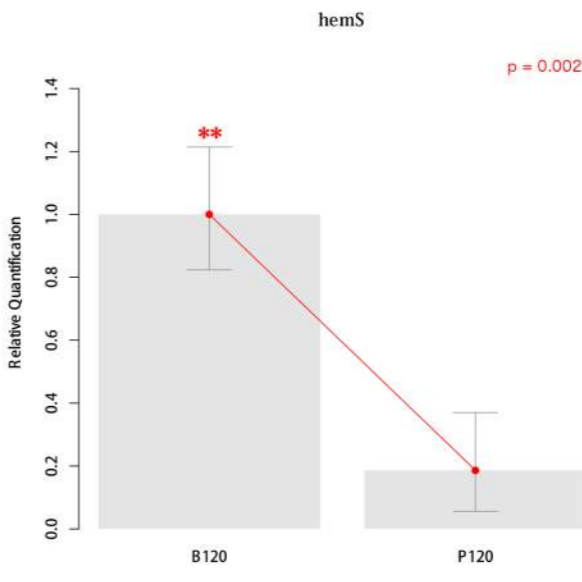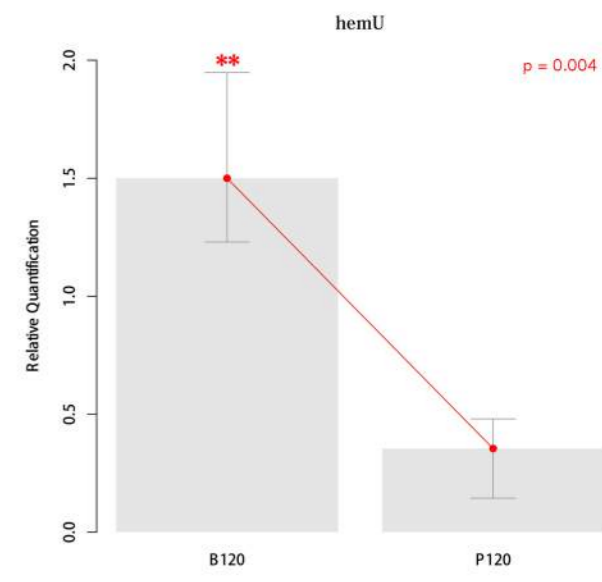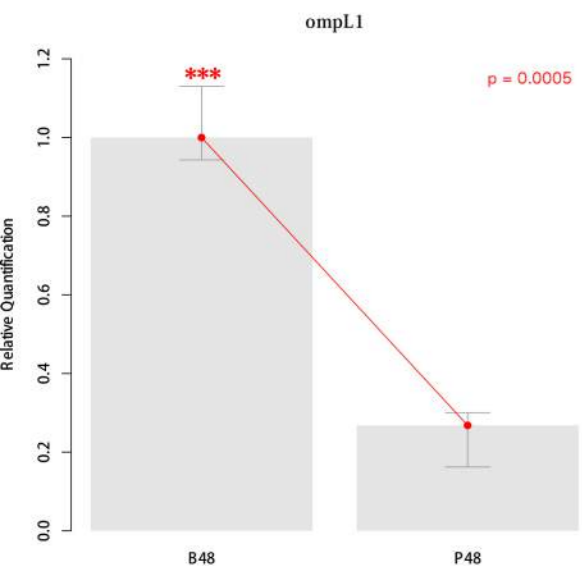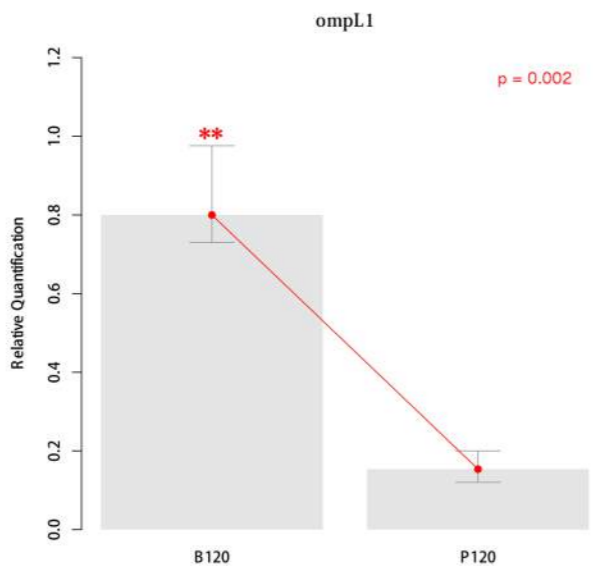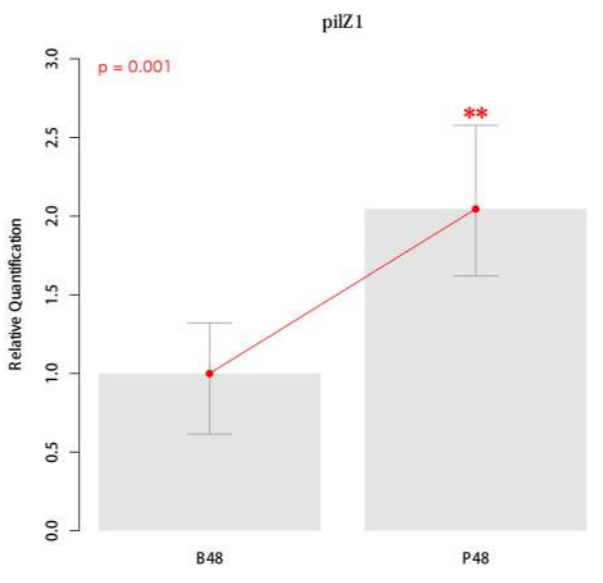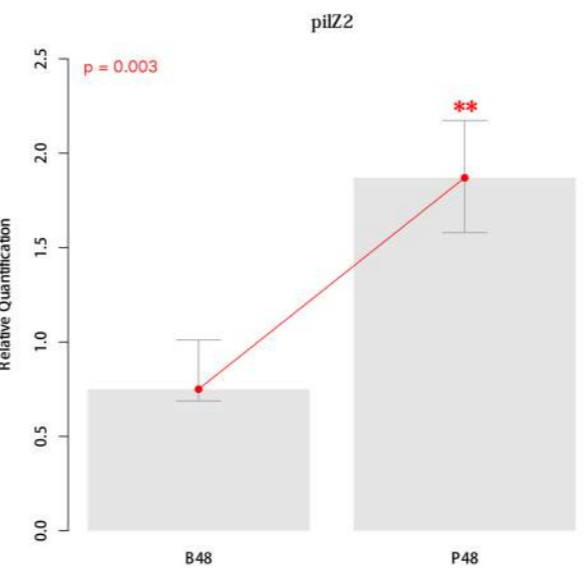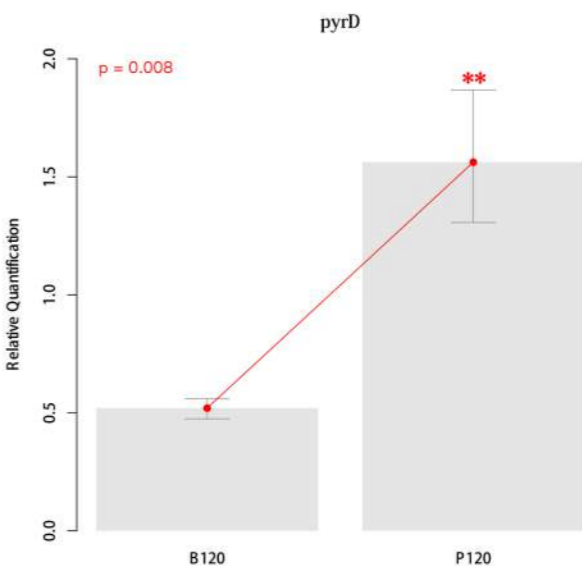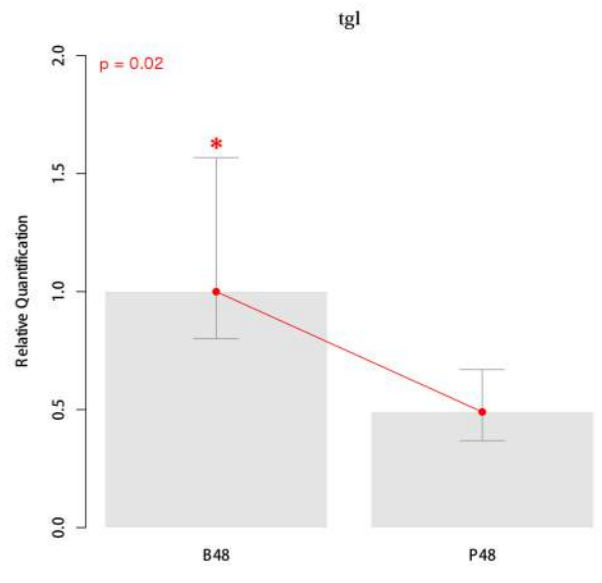

Supplement: sph002162059sf2.pdf [file sph002162059sf2.pdf]
