# Supplementary material for: Transcriptome Sequencing Reveals Wide Expression Reprogramming of Basal and Unknown Genes in Leptospira biflexa Biofilms
Source: PubMed Central journal article supplement (PMC4863578; doi:10.1128/msphere.00042-16), 2016-04-06
Supplement: sph002162059st3.pdf [file sph002162059st3.pdf]

Table S1

**Table S1.** Information for deposited data at Sequence Read Archive.

| BioProject  | Accession    | Sample Name | Organism                                | Strain          | TaxID | SRA object                                                                             |
|-------------|--------------|-------------|-----------------------------------------|-----------------|-------|----------------------------------------------------------------------------------------|
| PRJNA288909 | SAMN04364752 | BA48        | <i>Leptospira biflexa</i> serovar Patoc | Patoc I (Paris) | 172   | <a href="http://www.ncbi.nlm.nih.gov/sra/4364752">www.ncbi.nlm.nih.gov/sra/4364752</a> |
| PRJNA288909 | SAMN04364753 | BB48        | <i>Leptospira biflexa</i> serovar Patoc | Patoc I (Paris) | 172   | <a href="http://www.ncbi.nlm.nih.gov/sra/4364753">www.ncbi.nlm.nih.gov/sra/4364753</a> |
| PRJNA288909 | SAMN04364754 | BC48        | <i>Leptospira biflexa</i> serovar Patoc | Patoc I (Paris) | 172   | <a href="http://www.ncbi.nlm.nih.gov/sra/4364754">www.ncbi.nlm.nih.gov/sra/4364754</a> |
| PRJNA288909 | SAMN04364755 | PA48        | <i>Leptospira biflexa</i> serovar Patoc | Patoc I (Paris) | 172   | <a href="http://www.ncbi.nlm.nih.gov/sra/4364755">www.ncbi.nlm.nih.gov/sra/4364755</a> |
| PRJNA288909 | SAMN04364756 | PB48        | <i>Leptospira biflexa</i> serovar Patoc | Patoc I (Paris) | 172   | <a href="http://www.ncbi.nlm.nih.gov/sra/4364756">www.ncbi.nlm.nih.gov/sra/4364756</a> |
| PRJNA288909 | SAMN04364757 | PC48        | <i>Leptospira biflexa</i> serovar Patoc | Patoc I (Paris) | 172   | <a href="http://www.ncbi.nlm.nih.gov/sra/4364757">www.ncbi.nlm.nih.gov/sra/4364757</a> |
| PRJNA288909 | SAMN04364758 | BA120       | <i>Leptospira biflexa</i> serovar Patoc | Patoc I (Paris) | 172   | <a href="http://www.ncbi.nlm.nih.gov/sra/4364758">www.ncbi.nlm.nih.gov/sra/4364758</a> |
| PRJNA288909 | SAMN04364759 | BB120       | <i>Leptospira biflexa</i> serovar Patoc | Patoc I (Paris) | 172   | <a href="http://www.ncbi.nlm.nih.gov/sra/4364759">www.ncbi.nlm.nih.gov/sra/4364759</a> |
| PRJNA288909 | SAMN04364760 | BC120       | <i>Leptospira biflexa</i> serovar Patoc | Patoc I (Paris) | 172   | <a href="http://www.ncbi.nlm.nih.gov/sra/4364760">www.ncbi.nlm.nih.gov/sra/4364760</a> |
| PRJNA288909 | SAMN04364761 | PA120       | <i>Leptospira biflexa</i> serovar Patoc | Patoc I (Paris) | 172   | <a href="http://www.ncbi.nlm.nih.gov/sra/4364761">www.ncbi.nlm.nih.gov/sra/4364761</a> |
| PRJNA288909 | SAMN04364762 | PB120       | <i>Leptospira biflexa</i> serovar Patoc | Patoc I (Paris) | 172   | <a href="http://www.ncbi.nlm.nih.gov/sra/4364762">www.ncbi.nlm.nih.gov/sra/4364762</a> |
| PRJNA288909 | SAMN04364763 | PC120       | <i>Leptospira biflexa</i> serovar Patoc | Patoc I (Paris) | 172   | <a href="http://www.ncbi.nlm.nih.gov/sra/4364763">www.ncbi.nlm.nih.gov/sra/4364763</a> |
