# Supplementary material for: Transcriptome Sequencing Reveals Wide Expression Reprogramming of Basal and Unknown Genes in Leptospira biflexa Biofilms
Source: PubMed Central journal article supplement (PMC4863578; doi:10.1128/msphere.00042-16), 2016-04-06
Supplement: sph002162059st4.pdf [file sph002162059st4.pdf]

Table S2

**Table S2.** Primers used in RT-PCR analysis.

| Gene                | Name          | Sequence (5' -> 3')   | Strand | Bp | Tm    | GC |
|---------------------|---------------|-----------------------|--------|----|-------|----|
| <i>LEPBI_I0073</i>  | galK-F        | AGTGGTAACTGGCTTTGCGA  | Plus   | 20 | 59.89 | 50 |
|                     | galK-R        | GCTTTCTGTCCAATCACGGC  | Minus  | 20 | 59.83 | 55 |
| <i>LEPBI_I3479</i>  | dnaX2-F       | AGAACCGCCTCCACATACAA  | Plus   | 20 | 59.02 | 50 |
|                     | dnaX2-R       | CTGCGGGAGGTAGTGGAAAG  | Minus  | 20 | 60.11 | 60 |
| <i>LEPBI_I1589</i>  | flaB-F        | GTCTAACGACGCGAACCTGA  | Plus   | 20 | 60.11 | 55 |
|                     | flaB-R        | CTGCAAGTCCAGATGCGTCA  | Minus  | 20 | 60.67 | 55 |
| <i>LEPBI_I1944</i>  | adk-F         | CAAGCAAAGGCTCTCTCGGA  | Plus   | 20 | 59.75 | 50 |
|                     | adk-R         | AGCGTCCTTCTTTGATCGCT  | Minus  | 20 | 59.61 | 55 |
| <i>LEPBI_Ia0817</i> | ompL1-F       | AGTGGGTTTCGGTCTCAACTG | Plus   | 20 | 59.61 | 55 |
|                     | ompL1-R       | GAGCAGAAGCTCCACCGATT  | Minus  | 20 | 60.11 | 55 |
| <i>LEPBI_I2132</i>  | flaB3-F       | GCAAACGCAAGGCAAAGAGA  | Plus   | 20 | 59.97 | 50 |
|                     | flaB3-R       | TTTCCAGGTGTGCGAGAGTGC | Minus  | 20 | 59.97 | 55 |
| <i>LEPBI_p0012</i>  | hemS-F        | AATTCGAGACGCAGCCAAAC  | Plus   | 20 | 59.48 | 50 |
|                     | hemS-R        | CCCAAGTTTTGGCGTTTCCA  | Minus  | 20 | 59.54 | 50 |
| <i>LEPBI_p0014</i>  | hemU-F        | AGTTTGGGAGGGGCATCTTG  | Plus   | 20 | 59.96 | 55 |
|                     | hemU-R        | CCAAGTGACCTGCTTCTCGT  | Minus  | 20 | 59.97 | 55 |
| <i>LEPBI_I0092</i>  | pyrD-F        | GACTTGCCGCTGGATTTGAC  | Plus   | 20 | 59.83 | 50 |
|                     | pyrD-R        | TTTGGCTGTGATGGTTCCGA  | Minus  | 20 | 59.89 | 55 |
| <i>LEPBI_I0008</i>  | pilZ1-F       | GACTAGCCTTTCAAACGACA  | Plus   | 20 | 55.72 | 45 |
|                     | pilZ1-R       | AGAGGTTTGGAAAATCACCGA | Minus  | 20 | 54.89 | 40 |
| <i>LEPBI_I10088</i> | pilZ2-F       | GTATCCAAAGGCAAAAGTGG  | Plus   | 20 | 54.84 | 45 |
|                     | pilZ2-R       | TATCGTCCTCAAAAAGTTGGT | Minus  | 21 | 55.16 | 38 |
| <i>LEPBI_I0917</i>  | cheY1-F       | GGTATGACGGGAATCGAATTA | Plus   | 21 | 55.29 | 43 |
|                     | cheY1-R       | GGTTTTACAAGCCAACCAAC  | Minus  | 20 | 55.66 | 45 |
| <i>LEPBI_I1764</i>  | cheR-F        | TTACTCCAGTTTCCGTTTCC  | Plus   | 20 | 55.31 | 45 |
|                     | cheR-R        | AGGATCAAATACCCTTTGGG  | Minus  | 20 | 54.65 | 45 |
| <i>LEPBI_I2335</i>  | flaA1-F       | TGAATCTTGGGACAATCCAG  | Plus   | 20 | 55.02 | 45 |
|                     | flaA1-R       | GATTTTGCTGGGTCATTCAG  | Minus  | 20 | 54.93 | 45 |
| <i>LEPBI_I2336</i>  | flaA2-F       | ACAGACACACCTTATTTGCT  | Plus   | 20 | 54.88 | 40 |
|                     | flaA2-R       | TTGCTGTCAACTTTCTCCAT  | Minus  | 20 | 55.17 | 40 |
| <i>LEPBI_I0104</i>  | acdA1-F       | AAGAGTATGGTGGTATGGGT  | Plus   | 20 | 55.19 | 45 |
|                     | acdA1-R       | TCCTTGTTGTGCTTGGATTA  | Minus  | 20 | 54.86 | 40 |
| <i>LEPBI_I0052</i>  | acd-F         | ATGAGAGACCTTGGTGAGAT  | Plus   | 20 | 55.23 | 45 |
|                     | acd-R         | TTTCTGCATCCAATCCGTTA  | Minus  | 20 | 55.05 | 40 |
| <i>LEPBI_I0777</i>  | tgl-F         | TTTTAGCGACCCTTCTCTC   | Plus   | 20 | 55.1  | 45 |
|                     | tgl-R         | CCTCCCAATACTTTACGAG   | Minus  | 20 | 54.95 | 50 |
| <i>LEPBI_I10198</i> | fabG1-F       | AAGGATTGATTGTTCTCGT   | Plus   | 20 | 54.8  | 40 |
|                     | fabG1-R       | GGTTTCCTGTAGAATGGGTT  | Minus  | 20 | 54.92 | 45 |
| <i>LEPBI_I10199</i> | fabG2-F       | CGAACTATCTCTTGCTGGAA  | Plus   | 20 | 54.31 | 45 |
|                     | fabG2-R       | TACACAATGAGTTCTGGACG  | Minus  | 20 | 55.14 | 45 |
| <i>LEPBI_I10211</i> | fabG3-F       | CGAAGAACTTGCCATTTACC  | Plus   | 20 | 54.99 | 45 |
|                     | fabG3-R       | ACACGATGGAGGATACAATC  | Minus  | 20 | 54.65 | 45 |
| <i>LEPBI_I2771</i>  | LEPBI_I2771-F | CTCTCGGTGGAGTTTTCGGT  | Plus   | 20 | 59.68 | 55 |
|                     | LEPBI_I2771-R | AACAAATCCCTTCGCCAGCA  | Minus  | 20 | 60.64 | 50 |
