# Supplementary material for: Transcriptome Sequencing Reveals Wide Expression Reprogramming of Basal and Unknown Genes in Leptospira biflexa Biofilms
Source: PubMed Central journal article supplement (PMC4863578; doi:10.1128/msphere.00042-16), 2016-04-06
Supplement: sph002162059st5.pdf [file sph002162059st5.pdf]

Table S3

**Table S3.** Genes used for normalization in RT-PCR relative quantification.

| Gene               | Position         | Strand | PID       | Product                                      | CPM      |          |          |          |          |          |          |          |          |
|--------------------|------------------|--------|-----------|----------------------------------------------|----------|----------|----------|----------|----------|----------|----------|----------|----------|
|                    |                  |        |           |                                              | BA120    | BA48     | BB120    | BB48     | BC120    | PA120    | PB120    | PB48     | PC48     |
| <i>LEPBI_I1415</i> | 1475003..1476904 | Minus  | 183220804 | hypothetical protein                         | 439.3144 | 458.2669 | 446.4948 | 433.2076 | 453.9055 | 467.2638 | 433.2911 | 442.8527 | 424.992  |
| <i>LEPBI_I1808</i> | 1889568..1891535 | Plus   | 183221194 | hypothetical protein                         | 472.9315 | 476.9131 | 473.6058 | 486.5844 | 462.4646 | 492.072  | 459.8609 | 465.6223 | 480.1459 |
| <i>LEPBI_I2349</i> | 2419330..2420382 | Minus  | 183221720 | Mrp family ATP-binding protein               | 372.4622 | 386.1203 | 381.2275 | 373.9328 | 380.1873 | 359.5911 | 389.1445 | 371.2439 | 379.0303 |
| <i>LEPBI_I2735</i> | 2827100..2828275 | Minus  | 183222093 | phpshoribosylglycinamide formyltransferase 2 | 332.7329 | 344.6683 | 338.0508 | 327.0437 | 360.0321 | 339.898  | 360.1222 | 351.7742 | 334.6008 |
| <i>LEPBI_I2771</i> | 2869795..2871150 | Plus   | 183222128 | nitrite extrusion protein 1 NarK             | 503.8746 | 479.0646 | 477.9569 | 478.6221 | 495.3203 | 485.9339 | 490.5183 | 474.5322 | 471.8729 |
| <i>LEPBI_I3250</i> | 3364591..3366072 | Minus  | 183222595 | hypothetical protein                         | 343.0473 | 357.7207 | 343.0713 | 327.0437 | 354.7863 | 342.4555 | 350.3118 | 350.7842 | 337.3584 |
