# Supplementary material for: Transcriptome Sequencing Reveals Wide Expression Reprogramming of Basal and Unknown Genes in Leptospira biflexa Biofilms
Source: PubMed Central journal article supplement (PMC4863578; doi:10.1128/msphere.00042-16), 2016-04-06
Supplement: sph002162059st6.pdf [file sph002162059st6.pdf]

Table S4

**Table S4.** Reads mapped by sample.

| Sample | Total reads | Mapped reads | Percentage mapped |
|--------|-------------|--------------|-------------------|
| BA120  | 2804203     | 2782554      | 99,23             |
| BA48   | 7500998     | 7411156      | 98,80             |
| BB120  | 3207624     | 3174615      | 98,97             |
| BB48   | 3642931     | 3603771      | 98,93             |
| BC120  | 3875081     | 3847960      | 99,30             |
| BC48   | 3803957     | 3770114      | 99,11             |
| PA120  | 4203432     | 4150680      | 98,75             |
| PA48   | 2988218     | 2947702      | 98,64             |
| PB120  | 2631490     | 2598663      | 98,75             |
| PB48   | 3248509     | 3217719      | 99,05             |
| PC120  | 3963865     | 3921581      | 98,93             |
| PC48   | 3495242     | 3465387      | 99,15             |
