# Supplementary material for: Transcriptome Sequencing Reveals Wide Expression Reprogramming of Basal and Unknown Genes in Leptospira biflexa Biofilms
Source: PubMed Central journal article supplement (PMC4863578; doi:10.1128/msphere.00042-16), 2016-04-06
Supplement: sph002162059st7.pdf [file sph002162059st7.pdf]

**Table S5.** Differentially expressed genes in BvsP\_48.

| Gene     | Synonym     | logFC         | logCPM        | FDR                  | Symbol | Product                                                     |
|----------|-------------|---------------|---------------|----------------------|--------|-------------------------------------------------------------|
| ABZ96148 | LEPBI_I0001 | -0.2774406778 | 8.5116201028  | 0.0053046021         | dnaA   | chromosomal replication initiator protein DnaA              |
| ABZ96150 | LEPBI_I0003 | -0.4022559485 | 8.4323463739  | 0.000139877          | recF   | DNA replication and repair protein RecF                     |
| ABZ96152 | LEPBI_I0005 | -0.3139795549 | 9.0950452965  | 0.0018130464         | gyrB1  | DNA gyrase subunit B                                        |
| ABZ96155 | LEPBI_I0008 | -0.3074474689 | 7.2818832392  | 0.0096018139         | NA     | hypothetical protein                                        |
| ABZ96156 | LEPBI_I0009 | 0.3502868581  | 7.5171605832  | 0.0028384439         | NA     | putative lipoprotein                                        |
| ABZ96158 | LEPBI_I0011 | -0.4534660497 | 6.9621288105  | 0.0042304467         | NA     | putative transcriptional regulator                          |
| ABZ96159 | LEPBI_I0012 | -0.357484434  | 8.8520236062  | 0.0031133869         | NA     | hypothetical protein                                        |
| ABZ96166 | LEPBI_I0019 | -0.3098364837 | 8.9794109813  | 0.0084875894         | NA     | hypothetical protein                                        |
| ABZ96171 | LEPBI_I0024 | -0.3863406079 | 9.3867439699  | 0.0027528366         | NA     | beta-galactosidase                                          |
| ABZ96173 | LEPBI_I0026 | -0.4777871545 | 7.4091532672  | 0.0004077755         | NA     | putative inositol monophosphatase                           |
| ABZ96175 | LEPBI_I0028 | -0.442003301  | 9.0412007891  | 0.000146355          | trpE   | anthranilate synthase component I                           |
| ABZ96177 | LEPBI_I0030 | -0.3347394772 | 8.1861618677  | 0.0070359004         | NA     | hypothetical protein                                        |
| ABZ96182 | LEPBI_I0035 | -0.477146564  | 9.0393467659  | 4.64326737848941e-06 | NA     | putative signal peptide                                     |
| ABZ96184 | LEPBI_I0037 | -0.373757529  | 9.1252962907  | 0.0012352623         | NA     | putative transferase                                        |
| ABZ96186 | LEPBI_I0039 | -0.3736306437 | 8.1434524694  | 0.0003596931         | NA     | hypothetical protein                                        |
| ABZ96190 | LEPBI_I0043 | -0.4706324501 | 8.4109368398  | 0.0077450449         | NA     | aromatic-ring-opening dioxygenase domain-containing protein |
| ABZ96191 | LEPBI_I0044 | -0.4604881242 | 7.4691987591  | 5.91834924947306e-05 | NA     | putative carboxylesterase 2                                 |
| ABZ96192 | LEPBI_I0045 | -0.3698842168 | 9.0717845682  | 0.0013549259         | NA     | hypothetical protein                                        |
| ABZ96196 | LEPBI_I0049 | -0.4669239353 | 8.9020987668  | 2.40313634841349e-05 | purB   | adenylosuccinate lyase                                      |
| ABZ96198 | LEPBI_I0051 | -0.3512405894 | 8.8630789741  | 0.0030706015         | NA     | hypothetical protein                                        |
| ABZ96199 | LEPBI_I0052 | -0.3622163973 | 8.1845996565  | 0.0004859711         | NA     | enoyl-CoA hydratase                                         |
| ABZ96208 | LEPBI_I0061 | -0.3769135626 | 10.1014463632 | 0.0087672092         | NA     | hypothetical protein                                        |
| ABZ96213 | LEPBI_I0066 | -0.3917368362 | 7.486913097   | 0.0033413964         | NA     | hypothetical protein                                        |
| ABZ96217 | LEPBI_I0070 | -0.3825863243 | 9.449611773   | 0.004681717          | NA     | hypothetical protein                                        |
| ABZ96220 | LEPBI_I0073 | -0.4819391668 | 8.5328401613  | 9.1654086500572e-07  | galk   | galactokinase                                               |
| ABZ96224 | LEPBI_I0077 | -0.3314721003 | 9.0017014354  | 0.0021136793         | NA     | putative sensor protein                                     |
| ABZ96235 | LEPBI_I0088 | -0.298835188  | 8.9357120588  | 0.003460699          | NA     | putative signal peptide                                     |
| ABZ96237 | LEPBI_I0090 | -0.4157240886 | 9.2897223871  | 0.001569541          | NA     | putative oxidase                                            |
| ABZ96238 | LEPBI_I0091 | -0.3030960644 | 8.1027805627  | 0.0076325689         | NA     | putative tRNA (uracil-5-)-methyltransferase                 |
| ABZ96244 | LEPBI_I0097 | -0.4700054339 | 8.0563553901  | 7.79334221119504e-07 | NA     | ankyrin repeat-containing protein                           |
| ABZ96245 | LEPBI_I0098 | -0.3970132974 | 9.0448348634  | 3.63414633235725e-05 | NA     | hypothetical protein                                        |
| ABZ96246 | LEPBI_I0099 | -0.4288183405 | 8.6933414056  | 7.04021669116444e-06 | NA     | hypothetical protein                                        |
| ABZ96248 | LEPBI_I0101 | -0.518142507  | 8.0990336105  | 6.99181096563781e-06 | NA     | hypothetical protein                                        |
| ABZ96249 | LEPBI_I0102 | -0.4350157667 | 8.8243622577  | 2.16054772528284e-06 | NA     | putative oxidoreductase                                     |
| ABZ96251 | LEPBI_I0104 | -0.3341687746 | 8.8338910337  | 0.0013774153         | acdA1  | acyl-CoA dehydrogenase                                      |
| ABZ96252 | LEPBI_I0105 | -0.3557708678 | 7.7921401064  | 0.0009485027         | NA     | hypothetical protein                                        |
| ABZ96253 | LEPBI_I0106 | -0.4518437306 | 7.6132521374  | 0.0003824709         | NA     | putative short chain dehydrogenase                          |
| ABZ96254 | LEPBI_I0107 | -0.4636723048 | 9.4566216282  | 9.3523605875722e-06  | NA     | long-chain-fatty-acid--CoA ligase                           |
| ABZ96256 | LEPBI_I0109 | -0.3706246578 | 8.8295025643  | 0.0001259528         | NA     | putative methyl-accepting chemotaxis protein                |
| ABZ96257 | LEPBI_I0110 | -0.4424158665 | 8.2890135629  | 0.0006287292         | NA     | hypothetical protein                                        |
| ABZ96258 | LEPBI_I0111 | -0.3277726468 | 8.7237083684  | 0.0007867803         | NA     | putative signal peptide                                     |
| ABZ96259 | LEPBI_I0112 | -0.3279609349 | 8.8962597971  | 0.0011635074         | NA     | hypothetical protein                                        |
| ABZ96260 | LEPBI_I0113 | -0.3239615854 | 8.0897790689  | 0.0009579837         | NA     | putative UDP-glucose 4-epimerase                            |
| ABZ96264 | LEPBI_I0117 | -0.3095108304 | 7.4960970408  | 0.009654403          | NA     | hypothetical protein                                        |
| ABZ96274 | LEPBI_I0127 | -0.370392573  | 7.9396127742  | 0.0082841466         | NA     | putative HTH-type transcriptional regulator                 |
| ABZ96338 | LEPBI_I0193 | -0.3291644987 | 8.5455384924  | 0.0045109581         | NA     | hypothetical protein                                        |
| ABZ96345 | LEPBI_I0200 | -0.3289226024 | 9.3020386085  | 0.0025947351         | NA     | putative sodium/hydrogen exchanger                          |
| ABZ96371 | LEPBI_I0226 | -0.5570336031 | 6.5980863012  | 4.26109554257761e-05 | NA     | hypothetical protein                                        |
| ABZ96383 | LEPBI_I0238 | 0.8723966739  | 8.4718942078  | 0.0017471752         | ispE   | 4-diphosphocytidyl-2-C-methyl-D-erythritol kinase           |
| ABZ96421 | LEPBI_I0277 | -0.6563696817 | 7.6638244092  | 7.90027845084163e-09 | NA     | hypothetical protein                                        |

## BvsP\_48

|          |              |               |              |                      |       |                                                           |
|----------|--------------|---------------|--------------|----------------------|-------|-----------------------------------------------------------|
| ABZ96433 | LEPBI_I0289  | 1.8438733273  | 7.5568783639 | 1.06914352459008e-15 | NA    | hypothetical protein                                      |
| ABZ96457 | LEPBI_I0313  | 0.448373108   | 8.6493150698 | 0.0003083947         | NA    | putative signal peptide                                   |
| ABZ96563 | LEPBI_I0421  | 0.7195404874  | 6.3083556045 | 4.43574846217621e-08 | NA    | hypothetical protein                                      |
| ABZ96565 | LEPBI_I0423  | 0.3211201899  | 7.3499368732 | 0.0076325689         | NA    | putative signal peptide                                   |
| ABZ96582 | LEPBI_I0443  | 0.8056206823  | 4.9832349658 | 0.000957185          | NA    | hypothetical protein                                      |
| ABZ96659 | LEPBI_I0521  | 0.6180908237  | 6.1395450172 | 0.0002147941         | NA    | anti-sigma factor antagonist                              |
| ABZ96725 | LEPBI_I0587  | 0.3549662311  | 7.327459629  | 0.0017342727         | NA    | hypothetical protein                                      |
| ABZ96800 | LEPBI_I0667  | 0.9032099913  | 6.0998438356 | 5.78093429758115e-07 | NA    | putative signal peptide                                   |
| ABZ96802 | LEPBI_I0669  | 0.5017394719  | 7.5789632707 | 1.43041796884428e-05 | hmuO  | heme oxygenase                                            |
| ABZ96808 | LEPBI_I0676  | 0.4991770368  | 6.5858554519 | 0.004016948          | NA    | hypothetical protein                                      |
| ABZ96814 | LEPBI_I0682  | 0.3674286703  | 6.1965768182 | 0.0078757222         | NA    | hypothetical protein                                      |
| ABZ96815 | LEPBI_I0683  | 0.4540808952  | 7.9980262479 | 9.5023337179605e-05  | NA    | putative lipoprotein                                      |
| ABZ96907 | LEPBI_I0777  | 0.6868192459  | 7.6419021    | 1.54041528097758e-06 | NA    | putative triglyceride lipase                              |
| ABZ96925 | LEPBI_I0796  | 0.3531508652  | 7.5885669957 | 0.0021221783         | gpo   | glutathione peroxidase                                    |
| ABZ96937 | LEPBI_I0809  | 0.6973518276  | 6.1705809417 | 0.0002150987         | NA    | hypothetical protein                                      |
| ABZ96945 | LEPBI_Ia0817 | 0.8786248977  | 8.9245698738 | 2.09177309471283e-21 | ompL1 | outer membrane protein                                    |
| ABZ96985 | LEPBI_I0858  | 1.4839124032  | 8.5411101175 | 2.01753335334787e-09 | NA    | hypothetical protein                                      |
| ABZ96986 | LEPBI_I0859  | 1.3491070558  | 8.5895762377 | 7.03663828092268e-30 | NA    | hypothetical protein                                      |
| ABZ96987 | LEPBI_I0860  | 0.7552571541  | 8.267598476  | 2.02112082335745e-12 | NA    | hypothetical protein                                      |
| ABZ96998 | LEPBI_I0873  | 0.4659417786  | 6.485032011  | 0.0020637531         | NA    | hypothetical protein                                      |
| ABZ97018 | LEPBI_I0893  | 0.4653338158  | 6.6984762996 | 0.0095540583         | NA    | putative regulatory protein                               |
| ABZ97030 | LEPBI_I0905  | 0.6809643185  | 6.8601264464 | 2.31056175421379e-07 | NA    | putative anti-sigma factor antagonist                     |
| ABZ97041 | LEPBI_I0917  | 0.4773756998  | 6.2952693548 | 0.0006850977         | cheY1 | chemotactic two-component response regulator protein CheY |
| ABZ97070 | LEPBI_I0946  | 0.3176056679  | 7.9648828691 | 0.0085635457         | fliA  | RNA polymerase sigma factor WhiG                          |
| ABZ97081 | LEPBI_I0957  | 1.1012455931  | 9.281950417  | 3.40542288292167e-05 | NA    | hypothetical protein                                      |
| ABZ97143 | LEPBI_I1020  | 0.7142022669  | 5.9886276183 | 4.95643261880913e-05 | rpmB  | 50S ribosomal protein L28                                 |
| ABZ97159 | LEPBI_I1036  | 0.9291929424  | 5.4535860263 | 6.85666235719861e-08 | NA    | putative anti-sigma factor antagonist                     |
| ABZ97160 | LEPBI_I1037  | 0.6137566467  | 5.9680613995 | 0.0017471752         | NA    | putative signal peptide                                   |
| ABZ97250 | LEPBI_I1132  | 0.342328393   | 7.175594265  | 0.0063862457         | etfA  | electron transfer flavoprotein subunit alpha              |
| ABZ97276 | LEPBI_I1160  | 0.487018755   | 7.0716500746 | 0.0001173503         | NA    | hypothetical protein                                      |
| ABZ97291 | LEPBI_I1175  | 2.1796952693  | 9.6792875369 | 1.0723535424186e-14  | NA    | hypothetical protein                                      |
| ABZ97296 | LEPBI_I1180  | 0.2821977452  | 8.8989611081 | 0.0076977254         | cysJ  | sulfite reductase flavoprotein subunit alpha              |
| ABZ97313 | LEPBI_I1197  | 0.7143324301  | 6.483242449  | 1.89484769695168e-06 | NA    | putative anti-sigma factor antagonist                     |
| ABZ97437 | LEPBI_I1327  | 0.7003918226  | 6.7889999511 | 1.27955265645694e-07 | NA    | hypothetical protein                                      |
| ABZ97464 | LEPBI_I1354  | 0.5916591726  | 5.5186133886 | 0.0076325689         | NA    | hypothetical protein                                      |
| ABZ97465 | LEPBI_I1355  | 0.450274531   | 6.9491788967 | 0.0020505773         | NA    | hypothetical protein                                      |
| ABZ97468 | LEPBI_I1358  | 0.5896007387  | 7.691889098  | 2.09752587232849e-05 | ahpC2 | alkyl hydroperoxide reductase subunit C                   |
| ABZ97483 | LEPBI_I1374  | 0.5259074063  | 7.1912266909 | 0.0008295216         | NA    | putative signal peptide                                   |
| ABZ97539 | LEPBI_I1431  | 0.4320313492  | 6.6533332517 | 0.001899946          | NA    | hypothetical protein                                      |
| ABZ97567 | LEPBI_I1460  | 0.7605452406  | 8.4802439142 | 6.42633480772418e-11 | NA    | hypothetical protein                                      |
| ABZ97630 | LEPBI_I1523  | 0.8093042512  | 6.8410351384 | 1.88763349075341e-05 | NA    | hypothetical protein                                      |
| ABZ97636 | LEPBI_I1529  | 0.2757633926  | 8.6444776899 | 0.0078757222         | pnp   | polynucleotide phosphorylase/polyadenylase                |
| ABZ97660 | LEPBI_I1553  | 0.6223103932  | 7.5904339659 | 0.0001490022         | NA    | hypothetical protein                                      |
| ABZ97668 | LEPBI_I1561  | 2.2547102072  | 6.2211385294 | 3.03753117108509e-13 | NA    | hypothetical protein                                      |
| ABZ97671 | LEPBI_I1564  | 1.2813602135  | 6.2415586079 | 2.99916068854988e-05 | rpsU  | 30S ribosomal protein S21                                 |
| ABZ97696 | LEPBI_I1589  | 1.1976007103  | 8.4983223575 | 8.84666262432476e-19 | flaB  | flagellar filament core protein FlaB                      |
| ABZ97760 | LEPBI_I1653  | -0.3308361616 | 8.7710196891 | 0.0048006743         | NA    | histidine kinase sensor protein                           |
| ABZ97818 | LEPBI_I1712  | -0.3335181652 | 7.6796626338 | 0.0037172198         | NA    | hypothetical protein                                      |
| ABZ97822 | LEPBI_I1716  | 0.4148955931  | 7.0132458599 | 0.0028609619         | NA    | putative transcriptional regulator                        |
| ABZ97828 | LEPBI_I1722  | -0.3425874711 | 8.4385430108 | 0.0014010937         | asnC  | asparaginyl-tRNA synthetase                               |
| ABZ97847 | LEPBI_I1741  | 0.6878087418  | 6.7762049247 | 1.46583548016082e-07 | NA    | putative anti-sigma factor antagonist                     |
| ABZ97870 | LEPBI_I1764  | -0.3752435558 | 8.1274781223 | 0.0014263515         | cheR  | chemotaxis protein methyltransferase                      |
| ABZ97874 | LEPBI_I1768  | -0.2726518565 | 8.8133796008 | 0.0074527995         | NA    | hypothetical protein                                      |

BvsP\_48

|          |             |               |              |                      |        |                                                 |
|----------|-------------|---------------|--------------|----------------------|--------|-------------------------------------------------|
| ABZ97879 | LEPBI_I1773 | 0.4826032361  | 6.4431406362 | 0.0020100915         | rplU   | 50S ribosomal protein L21                       |
| ABZ97927 | LEPBI_I1821 | -0.472539901  | 8.3562674465 | 0.0013549259         | uppP   | undecaprenyl-diphosphatase                      |
| ABZ97928 | LEPBI_I1822 | 0.3841817286  | 7.2725099307 | 0.0051365774         | lipL31 | hypothetical protein                            |
| ABZ97932 | LEPBI_I1826 | -0.3027845205 | 8.714221964  | 0.009654403          | NA     | hypothetical protein                            |
| ABZ97936 | LEPBI_I1830 | -0.4051462675 | 8.0790273864 | 0.0001092322         | NA     | hypothetical protein                            |
| ABZ97977 | LEPBI_I1873 | 0.3797523665  | 7.4199539177 | 0.0033553975         | NA     | OmpA domain-containing protein                  |
| ABZ97979 | LEPBI_I1875 | -0.3481526423 | 9.0327880324 | 0.0018214691         | NA     | putative cyclic-nucleotide-gated cation channel |
| ABZ97987 | LEPBI_I1883 | 0.497060409   | 9.1583260814 | 2.39829787303184e-05 | fecA   | Iron(III) dicitrate TonB-dependent receptor     |
| ABZ98042 | LEPBI_I1939 | 0.4691771591  | 7.6291786255 | 0.0005144007         | rpoA   | DNA-directed RNA polymerase subunit alpha       |
| ABZ98043 | LEPBI_I1940 | 0.785015116   | 6.8695709785 | 1.59943081911331e-08 | rpsD   | 30S ribosomal protein S4                        |
| ABZ98044 | LEPBI_I1941 | 0.7709407874  | 6.0284836945 | 5.54973572993379e-05 | rpsK   | 30S ribosomal protein S11                       |
| ABZ98045 | LEPBI_I1942 | 0.8099274276  | 7.2382197288 | 5.1374358951367e-05  | rpsM   | 30S ribosomal protein S13                       |
| ABZ98047 | LEPBI_I1944 | 1.2011542675  | 7.582434287  | 3.927986482889e-09   | adk    | adenylate kinase                                |
| ABZ98051 | LEPBI_I1948 | 0.6033912619  | 6.4207941322 | 0.0002029436         | rpsE   | 30S ribosomal protein S5                        |
| ABZ98052 | LEPBI_I1949 | 0.4015120593  | 6.9013316787 | 0.004533346          | rplR   | 50S ribosomal protein L18                       |
| ABZ98053 | LEPBI_I1950 | 0.445597405   | 7.9281292974 | 0.0011316214         | rplF   | 50S ribosomal protein L6                        |
| ABZ98055 | LEPBI_I1952 | 0.5296909398  | 6.8987982903 | 0.0006287292         | rplE   | 50S ribosomal protein L5                        |
| ABZ98058 | LEPBI_I1955 | 0.593869769   | 5.6680117723 | 0.0011816936         | rpsQ   | 30S ribosomal protein S17                       |
| ABZ98063 | LEPBI_I1960 | 0.5314428839  | 6.3076127659 | 0.0009027774         | rpsS   | 30S ribosomal protein S19                       |
| ABZ98071 | LEPBI_I1968 | 0.6577493698  | 7.8629596368 | 4.65789205245376e-06 | rpsG   | 30S ribosomal protein S7                        |
| ABZ98075 | LEPBI_I1973 | 0.7590536473  | 7.1433181785 | 7.76496624580802e-05 | rplL   | 50S ribosomal protein L7/L12                    |
| ABZ98078 | LEPBI_I1976 | 0.6444300901  | 6.9254905332 | 9.53751438765862e-07 | rplK   | 50S ribosomal protein L11                       |
| ABZ98079 | LEPBI_I1977 | 0.4134176948  | 6.5867884018 | 0.0044034882         | nusG   | transcription antitermination protein NusG      |
| ABZ98123 | LEPBI_I2021 | 0.3232975628  | 8.1509533542 | 0.0087581221         | NA     | hypothetical protein                            |
| ABZ98158 | LEPBI_I2056 | 0.387438407   | 7.6924002243 | 0.0009485027         | sucC   | succinyl-CoA synthetase subunit beta            |
| ABZ98182 | LEPBI_I2080 | 0.3136475403  | 7.4812934163 | 0.0080382144         | gap    | glyceraldehyde-3-phosphate dehydrogenase        |
| ABZ98222 | LEPBI_I2120 | 0.4050618594  | 6.7631418125 | 0.0017074462         | NA     | putative rhodanese-like protein                 |
| ABZ98229 | LEPBI_I2127 | -0.3226402183 | 7.8895959439 | 0.0020067108         | NA     | hypothetical protein                            |
| ABZ98234 | LEPBI_I2132 | 0.9818268374  | 8.0151454016 | 4.79507813266989e-12 | flaB3  | flagellar filament 35 kDa core protein          |
| ABZ98235 | LEPBI_I2133 | 0.6662649147  | 8.7972458296 | 3.88300280306701e-09 | flaB2  | flagellar filament 35 kDa core protein          |
| ABZ98245 | LEPBI_I2143 | 0.6511156623  | 6.1255715526 | 1.64108949543208e-05 | NA     | hypothetical protein                            |
| ABZ98263 | LEPBI_I2162 | 0.6602805172  | 5.2229351838 | 0.0076325689         | NA     | hypothetical protein                            |
| ABZ98277 | LEPBI_I2178 | 0.6736955693  | 5.8393397543 | 0.0007441843         | NA     | hypothetical protein                            |
| ABZ98278 | LEPBI_I2179 | 0.5385024109  | 6.1121609277 | 0.0022329521         | NA     | hypothetical protein                            |
| ABZ98285 | LEPBI_I2186 | 0.3666009157  | 6.8836942332 | 0.0071694094         | NA     | hypothetical protein                            |
| ABZ98291 | LEPBI_I2192 | 0.7115460706  | 6.0031216541 | 5.72708546835716e-06 | NA     | hypothetical protein                            |
| ABZ98296 | LEPBI_I2197 | 0.608983689   | 4.9869206723 | 0.0064797966         | NA     | hypothetical protein                            |
| ABZ98313 | LEPBI_I2215 | 0.5702868326  | 5.6534165468 | 0.002783662          | NA     | hypothetical protein                            |
| ABZ98335 | LEPBI_I2239 | 1.0676042243  | 5.2054237171 | 7.74402199945281e-08 | NA     | hypothetical protein                            |
| ABZ98341 | LEPBI_I2245 | 0.5942809811  | 6.05871683   | 0.0009459959         | NA     | hypothetical protein                            |
| ABZ98345 | LEPBI_I2249 | 0.9316860953  | 4.5203356447 | 1.83069745509135e-05 | NA     | putative virulence-associated protein B         |
| ABZ98395 | LEPBI_I2300 | 0.4229678583  | 7.289483981  | 0.0015202802         | trxA2  | thioredoxin                                     |
| ABZ98404 | LEPBI_I2309 | 0.6475666187  | 6.1759139708 | 0.000298534          | NA     | hypothetical protein                            |
| ABZ98407 | LEPBI_I2312 | 0.381744625   | 7.3505483519 | 0.0031720687         | NA     | hypothetical protein                            |
| ABZ98420 | LEPBI_I2327 | 0.5398806218  | 8.6892593631 | 1.91588568281179e-07 | NA     | putative ATPase                                 |
| ABZ98421 | LEPBI_I2328 | 0.7262357443  | 8.0021304043 | 1.86740245994051e-08 | NA     | putative anti-sigma factor antagonist           |
| ABZ98427 | LEPBI_I2335 | 0.3329400745  | 7.4555872494 | 0.0067659289         | flaA1  | flagellar filament outer layer protein A        |
| ABZ98429 | LEPBI_I2337 | 0.8827476317  | 6.9587776068 | 3.3085705670083e-10  | NA     | hypothetical protein                            |
| ABZ98443 | LEPBI_I2352 | 0.4017207156  | 7.2196025597 | 0.0006413758         | NA     | hypothetical protein                            |
| ABZ98456 | LEPBI_I2365 | 0.2884302263  | 8.6111737674 | 0.005592818          | NA     | putative signal peptide                         |
| ABZ98466 | LEPBI_I2375 | 0.4060362201  | 8.1655992764 | 0.00175989           | NA     | hemolysin                                       |
| ABZ98487 | LEPBI_I2397 | 0.6483124138  | 4.927678441  | 0.0021674945         | NA     | hypothetical protein                            |
| ABZ98551 | LEPBI_I2462 | 0.6249201675  | 5.6350417864 | 0.0002319297         | NA     | putative signal peptide                         |

## BvsP\_48

|          |             |               |               |                      |       |                                                    |
|----------|-------------|---------------|---------------|----------------------|-------|----------------------------------------------------|
| ABZ98603 | LEPBI_I2518 | 0.517701659   | 7.5926052631  | 9.5023337179605e-05  | NA    | hypothetical protein                               |
| ABZ98605 | LEPBI_I2521 | -0.3921504799 | 8.6166309669  | 0.0029961746         | NA    | putative phospholipase                             |
| ABZ98637 | LEPBI_I2556 | 0.6473384042  | 4.8420418281  | 0.0044592063         | NA    | hypothetical protein                               |
| ABZ98639 | LEPBI_I2558 | 0.72051362    | 4.8158857148  | 0.0029961746         | NA    | hypothetical protein                               |
| ABZ98666 | LEPBI_I2585 | 0.9645631441  | 6.1305232359  | 0.006819283          | acpP  | acyl carrier protein                               |
| ABZ98674 | LEPBI_I2595 | 0.2741966008  | 8.7488277069  | 0.0084875894         | rpsA  | 30S ribosomal protein S1                           |
| ABZ98697 | LEPBI_I2618 | 0.6508038643  | 6.8626622771  | 0.0015202802         | NA    | putative signal peptide                            |
| ABZ98748 | LEPBI_I2670 | 0.6483161483  | 8.0733538377  | 1.76961775742407e-06 | NA    | putative signal peptide                            |
| ABZ98752 | LEPBI_I2674 | 0.6418081465  | 8.153967187   | 7.90027845084163e-09 | IntB  | apolipoprotein N-acyltransferase                   |
| ABZ98754 | LEPBI_I2676 | 0.8646608676  | 8.6629562717  | 3.14168265025901e-12 | NA    | CarD family transcriptional regulator              |
| ABZ98783 | LEPBI_I2705 | 0.5258404851  | 7.3673715019  | 5.54973572993379e-05 | NA    | hypothetical protein                               |
| ABZ98788 | LEPBI_I2710 | 1.1744820453  | 4.0922227985  | 0.0006771047         | NA    | hypothetical protein                               |
| ABZ98790 | LEPBI_I2712 | 0.9275820328  | 4.3194947743  | 7.76496624580802e-05 | NA    | hypothetical protein                               |
| ABZ98838 | LEPBI_I2760 | 0.3835725286  | 9.2277980906  | 0.0001554424         | NA    | putative TonB-dependent receptor protein           |
| ABZ98839 | LEPBI_I2761 | 0.6824124413  | 6.307398388   | 2.72829780708785e-07 | NA    | putative signal peptide                            |
| ABZ98862 | LEPBI_I2785 | 0.5242566095  | 6.1916277137  | 9.67450180611628e-05 | NA    | hypothetical protein                               |
| ABZ98912 | LEPBI_I2841 | 0.8901408199  | 5.3527854204  | 2.1314202935505e-07  | NA    | hypothetical protein                               |
| ABZ98931 | LEPBI_I2862 | 0.5128673609  | 10.0298131004 | 0.00577553           | NA    | hypothetical protein                               |
| ABZ98933 | LEPBI_I2864 | 1.1133684863  | 8.4763324115  | 1.32389521021739e-22 | NA    | hypothetical protein                               |
| ABZ99004 | LEPBI_I2935 | -0.3580039772 | 8.9862083644  | 0.0011865691         | NA    | hypothetical protein                               |
| ABZ99093 | LEPBI_I3027 | 0.4883106985  | 6.1270721741  | 0.0046847607         | NA    | TetR family transcriptional regulator              |
| ABZ99192 | LEPBI_I3126 | 0.3291606979  | 7.5643481771  | 0.008975755          | slyD  | FKBP-type peptidyl-prolyl cis-trans isomerase SlyD |
| ABZ99212 | LEPBI_I3147 | -0.433293192  | 7.2745539692  | 0.004930255          | NA    | TetR family transcriptional regulator              |
| ABZ99251 | LEPBI_I3186 | 1.9274265643  | 8.321380916   | 2.32436652989504e-12 | NA    | hypothetical protein                               |
| ABZ99340 | LEPBI_I3275 | -0.3040800082 | 8.0106153339  | 0.0076325689         | metF  | 5,10-methylenetetrahydrofolate reductase           |
| ABZ99355 | LEPBI_I3290 | -0.371505068  | 7.8407484687  | 0.0031744466         | NA    | hypothetical protein                               |
| ABZ99412 | LEPBI_I3348 | -0.3504554003 | 8.6977475258  | 0.0003038048         | NA    | hypothetical protein                               |
| ABZ99413 | LEPBI_I3349 | -0.3150684381 | 8.0586095595  | 0.0014723753         | NA    | hypothetical protein                               |
| ABZ99423 | LEPBI_I3359 | -0.4181321956 | 7.8565517028  | 0.0015272922         | NA    | hypothetical protein                               |
| ABZ99425 | LEPBI_I3361 | -0.3590553112 | 9.4706691295  | 0.0011559736         | NA    | hypothetical protein                               |
| ABZ99426 | LEPBI_I3362 | -0.325759062  | 9.697471866   | 0.0027906705         | NA    | TonB-dependent receptor protein                    |
| ABZ99427 | LEPBI_I3363 | -0.4560433223 | 7.5181215828  | 1.17395203031626e-05 | NA    | hypothetical protein                               |
| ABZ99428 | LEPBI_I3364 | -0.2890789834 | 9.2500335958  | 0.0063862457         | NA    | putative outer membrane lipoprotein                |
| ABZ99431 | LEPBI_I3367 | -0.3861818704 | 8.6837456051  | 5.91834924947306e-05 | NA    | UDP-N- acetylmuramate dehydrogenase                |
| ABZ99432 | LEPBI_I3368 | -0.3852140036 | 7.1475286481  | 0.0050805846         | NA    | ArsC family arsenate permease                      |
| ABZ99435 | LEPBI_I3371 | -0.3860537844 | 9.7393362491  | 0.000303663          | NA    | hypothetical protein                               |
| ABZ99436 | LEPBI_I3372 | -0.2981137323 | 9.5545917323  | 0.0078757222         | NA    | hypothetical protein                               |
| ABZ99437 | LEPBI_I3373 | -0.3436814821 | 8.2245152257  | 0.0011559736         | NA    | hypothetical protein                               |
| ABZ99438 | LEPBI_I3374 | -0.323665242  | 8.4062701451  | 0.009654403          | NA    | hypothetical protein                               |
| ABZ99442 | LEPBI_I3378 | -0.3638385163 | 8.9007318993  | 0.0006665973         | dnaJ  | chaperone protein DnaJ                             |
| ABZ99443 | LEPBI_I3379 | -0.3533635487 | 8.8856945882  | 0.0004703403         | dnaK  | molecular chaperone DnaK                           |
| ABZ99444 | LEPBI_I3380 | -0.4069242666 | 7.7915793917  | 0.0033879689         | grpE  | heat shock protein GrpE                            |
| ABZ99454 | LEPBI_I3390 | -0.3082109204 | 8.1716411427  | 0.002783662          | NA    | ABC transporter outer membrane protein             |
| ABZ99456 | LEPBI_I3392 | -0.3781413484 | 9.6009031817  | 0.0006530151         | NA    | hypothetical protein                               |
| ABZ99469 | LEPBI_I3407 | -0.2791945199 | 8.1299544669  | 0.009654403          | NA    | putative chemotaxis response regulator             |
| ABZ99470 | LEPBI_I3408 | -0.359091237  | 9.0154460416  | 0.0018214691         | aroC  | chorismate synthase                                |
| ABZ99474 | LEPBI_I3412 | -0.5476575721 | 7.8221326514  | 2.16300522117819e-05 | aroD  | 3-dehydroquinate dehydratase                       |
| ABZ99475 | LEPBI_I3413 | -0.3397920853 | 9.0633221317  | 0.0014319329         | NA    | putative signal peptide                            |
| ABZ99476 | LEPBI_I3414 | -0.3203598856 | 9.1153782947  | 0.0066784996         | NA    | oxidoreductase                                     |
| ABZ99477 | LEPBI_I3415 | -0.3916272731 | 7.6834640598  | 0.00845019           | NA    | hypothetical protein                               |
| ABZ99479 | LEPBI_I3417 | -0.4032445596 | 9.2698148294  | 0.0013360628         | pepN2 | aminopeptidase N                                   |
| ABZ99483 | LEPBI_I3422 | -0.4409107576 | 6.853470692   | 0.0012894481         | NA    | hypothetical protein                               |
| ABZ99494 | LEPBI_I3433 | -0.3748540924 | 8.2885852945  | 0.0010948741         | NA    | putative signal peptide                            |

## BvsP\_48

|          |              |               |               |                      |       |                                                                      |
|----------|--------------|---------------|---------------|----------------------|-------|----------------------------------------------------------------------|
| ABZ99501 | LEPBI_I3440  | -0.4061107651 | 9.6923366252  | 0.0001070033         | hepA  | ATP-dependent RNA helicase                                           |
| ABZ99507 | LEPBI_I3447  | -0.4136222336 | 7.7745925292  | 0.0001432651         | NA    | hypothetical protein                                                 |
| ABZ99509 | LEPBI_I3449  | -0.2967528546 | 8.402440069   | 0.0081496344         | NA    | hypothetical protein                                                 |
| ABZ99518 | LEPBI_I3458  | -0.4002192868 | 8.0973103331  | 3.77396197505922e-05 | NA    | TrmA family RNA methyltransferase                                    |
| ABZ99520 | LEPBI_I3461  | -0.4132345778 | 9.4690485431  | 9.5023337179605e-05  | dnaX1 | DNA polymerase III subunit gamma                                     |
| ABZ99523 | LEPBI_I3464  | -0.3614108107 | 8.7616774559  | 0.0011853288         | NA    | putative signal peptide                                              |
| ABZ99526 | LEPBI_I3467  | -0.4178076272 | 9.4674946582  | 0.0022391596         | serS  | seryl-tRNA synthetase                                                |
| ABZ99527 | LEPBI_I3468  | -0.4738666656 | 8.5530835698  | 1.01898022776492e-05 | NA    | putative hydrolase                                                   |
| ABZ99531 | LEPBI_I3472  | -0.3873762369 | 9.426563623   | 0.0005261486         | NA    | ABC transporter ATP-binding protein                                  |
| ABZ99532 | LEPBI_I3473  | -0.3084993805 | 8.2981378631  | 0.0043439646         | parB  | chromosome partitioning protein ParB                                 |
| ABZ99534 | LEPBI_I3475  | -0.3099708459 | 7.7853665576  | 0.005390319          | gidB  | glucose-inhibited division protein B                                 |
| ABZ99536 | LEPBI_I3477  | -0.3749634578 | 9.4367798935  | 0.0005144007         | gidA  | tRNA uridine 5-carboxymethylaminomethyl modification protein GidA    |
| ABZ99538 | LEPBI_I3479  | -0.4642040667 | 7.5343536677  | 0.0007441843         | dnaX2 | DNA polymerase III subunit gamma/tau                                 |
| ABZ99546 | LEPBI_II0008 | -0.3044908751 | 8.846672758   | 0.0033879689         | NA    | Histidine kinase sensor protein                                      |
| ABZ99550 | LEPBI_II0012 | -0.3305023627 | 7.9400143985  | 0.0006298511         | batA  | von Willebrand factor A                                              |
| ABZ99552 | LEPBI_II0014 | -0.3635262641 | 7.2958062658  | 0.0023792307         | NA    | hypothetical protein                                                 |
| ABZ99553 | LEPBI_II0015 | -0.5555213135 | 9.7966742459  | 0.0021508851         | NA    | methanol dehydrogenase regulator (MoxR)                              |
| ABZ99557 | LEPBI_II0019 | -0.5013035646 | 6.142125097   | 0.0062315272         | NA    | signal peptide                                                       |
| ABZ99559 | LEPBI_II0021 | -0.3273172442 | 7.9326448698  | 0.0050330915         | ndh   | NADH dehydrogenase                                                   |
| ABZ99564 | LEPBI_II0026 | -0.387284534  | 7.3549049373  | 0.0012658474         | NA    | chromosome partitioning protein ParB                                 |
| ABZ99570 | LEPBI_II0032 | -0.3226421312 | 8.5180412867  | 0.0033553975         | NA    | hypothetical protein                                                 |
| ABZ99573 | LEPBI_II0035 | -0.3848581304 | 8.5963102811  | 0.0002294211         | NA    | hypothetical protein                                                 |
| ABZ99577 | LEPBI_II0039 | -0.4317628792 | 7.4443177621  | 0.0004858284         | NA    | hypothetical protein                                                 |
| ABZ99578 | LEPBI_II0040 | -0.4095996349 | 8.099679672   | 1.85479332904623e-05 | NA    | hypothetical protein                                                 |
| ABZ99579 | LEPBI_II0041 | -0.2773366185 | 8.5020577941  | 0.009654403          | glpD  | glycerol-3-phosphate oxidase                                         |
| ABZ99586 | LEPBI_II0048 | -0.2961652863 | 8.5217379995  | 0.0068466741         | aspA  | Aspartate ammonia-lyase (aspartase)                                  |
| ABZ99593 | LEPBI_II0055 | -0.4889922716 | 6.6825737446  | 0.0023521999         | NA    | hypothetical protein                                                 |
| ABZ99594 | LEPBI_II0056 | -0.3789899424 | 7.4726472056  | 0.0006501991         | NA    | hypothetical protein                                                 |
| ABZ99596 | LEPBI_II0058 | -0.3017289464 | 9.1681648556  | 0.0085653983         | NA    | P-type ATPase, copper transporting ATPase, a phosphatase-like domain |
| ABZ99598 | LEPBI_II0060 | -0.3348220315 | 7.720393719   | 0.0077450449         | NA    | iron-sulfur cluster-binding protein; transmembrane protein           |
| ABZ99602 | LEPBI_II0064 | -0.3931432569 | 8.2613831628  | 6.69150719194611e-06 | NA    | cbb3-type cytochrome c oxidase subunit I                             |
| ABZ99604 | LEPBI_II0066 | -0.2856379733 | 8.1115591169  | 0.002908963          | glfD  | glutamate synthase (NADPH)                                           |
| ABZ99613 | LEPBI_II0075 | -0.3139760066 | 8.4737579511  | 0.0028384439         | traB  | Pheromone shutdown protein, TraB family                              |
| ABZ99619 | LEPBI_II0081 | -0.4029789389 | 6.6193324058  | 0.0032523022         | NA    | signal peptide                                                       |
| ABZ99622 | LEPBI_II0084 | -0.5189622304 | 8.7802207034  | 0.0004781311         | NA    | MotA/TolQ/ExbB proton channel protein                                |
| ABZ99623 | LEPBI_II0085 | -0.5206256185 | 8.7527155181  | 8.62005520862355e-09 | NA    | hypothetical protein                                                 |
| ABZ99624 | LEPBI_II0087 | -0.5164292732 | 10.0395416751 | 3.70753058017549e-06 | NA    | acriflavine resistance protein D; transmembrane protein              |
| ABZ99625 | LEPBI_II0088 | -0.5290373113 | 7.0127542183  | 9.91446625630244e-05 | NA    | hypothetical protein                                                 |
| ABZ99627 | LEPBI_II0090 | -0.3985813059 | 6.8225609576  | 0.008154375          | NA    | response regulatory protein                                          |
| ABZ99630 | LEPBI_II0094 | -0.3145397555 | 9.0870864192  | 0.0047792244         | mutB  | methylmalonyl-CoA mutase large subunit                               |
| ABZ99636 | LEPBI_II0100 | -0.4116015112 | 7.9607930649  | 3.40542288292167e-05 | NA    | hypothetical protein                                                 |
| ABZ99637 | LEPBI_II0101 | -0.544192899  | 8.1163761914  | 1.32262705794507e-08 | NA    | hypothetical protein                                                 |
| ABZ99643 | LEPBI_II0107 | -0.5497794033 | 8.4716290265  | 5.91834924947306e-05 | NA    | hypothetical protein                                                 |
| ABZ99645 | LEPBI_II0109 | -0.4705694741 | 8.2869700547  | 2.6245815773568e-07  | NA    | hypothetical protein                                                 |
| ABZ99646 | LEPBI_II0110 | -0.4002650537 | 8.1725594262  | 5.60163502933227e-05 | pyrF  | Orotidine-5'-monophosphate decarboxylase                             |
| ABZ99647 | LEPBI_II0111 | -0.4123139504 | 8.3859053142  | 5.17330300916011e-05 | NA    | dehydrogenase                                                        |
| ABZ99649 | LEPBI_II0113 | -0.5674751913 | 9.1160443759  | 7.71276280448329e-06 | cfa   | Cyclopropane-fatty-acyl-phospholipid synthase                        |
| ABZ99653 | LEPBI_II0117 | -0.3480574376 | 9.0595463636  | 0.0015852622         | NA    | signal peptide                                                       |
| ABZ99657 | LEPBI_II0121 | -0.4346819422 | 6.5363239245  | 0.004930255          | NA    | Dolichyl-phosphate beta-D-mannosyltransferase                        |
| ABZ99661 | LEPBI_II0125 | -0.4758101063 | 8.355063544   | 6.95339394839553e-07 | htrA1 | HtrA1; signal peptide                                                |
| ABZ99665 | LEPBI_II0129 | -0.2957721273 | 8.3407545591  | 0.0079732126         | NA    | permease; transmembrane protein                                      |
| ABZ99669 | LEPBI_II0133 | -0.3783479224 | 9.1816905984  | 0.0003522414         | NA    | helicase, ATP-dependent                                              |
| ABZ99671 | LEPBI_II0135 | -0.3543538884 | 8.0229748715  | 0.0011965073         | NA    | hypothetical protein                                                 |

## BvsP\_48

|          |              |               |               |                      |      |                                                                      |
|----------|--------------|---------------|---------------|----------------------|------|----------------------------------------------------------------------|
| ABZ99673 | LEPBI_II0138 | -0.5461933237 | 8.2848587832  | 1.19325371276709e-06 | NA   | hypothetical protein                                                 |
| ABZ99680 | LEPBI_II0145 | -0.3179354572 | 9.4306362124  | 0.0055750785         | NA   | adenylate/guanylate cyclase                                          |
| ABZ99681 | LEPBI_II0146 | -0.3406895939 | 8.5248328123  | 0.0011853288         | NA   | peroxidase                                                           |
| ABZ99683 | LEPBI_II0148 | -0.4533444242 | 7.7275686846  | 0.000139877          | NA   | hypothetical protein                                                 |
| ABZ99684 | LEPBI_II0149 | -0.5109758755 | 7.8067718605  | 3.60462839824744e-06 | NA   | hypothetical protein                                                 |
| ABZ99692 | LEPBI_II0157 | -0.340723336  | 8.2642200335  | 0.0017335867         | NA   | 4-coumarate--CoA ligase                                              |
| ABZ99695 | LEPBI_II0160 | -0.3806872131 | 8.2308799345  | 4.26109554257761e-05 | NA   | hypothetical protein                                                 |
| ABZ99697 | LEPBI_II0162 | -0.328675823  | 9.2197858187  | 0.0072404349         | NA   | hypothetical protein                                                 |
| ABZ99701 | LEPBI_II0166 | -0.4038974728 | 8.522443325   | 0.0006182772         | csdB | Cysteine desulfurase                                                 |
| ABZ99703 | LEPBI_II0168 | -0.3287123064 | 7.2301877943  | 0.0071602703         | NA   | hypothetical protein                                                 |
| ABZ99704 | LEPBI_II0169 | -0.4842459835 | 7.3511983529  | 0.0005047053         | NA   | N-carbamoyl-D-amino acid hydrolase                                   |
| ABZ99705 | LEPBI_II0170 | -0.5990106708 | 7.9432972941  | 2.71900577311796e-07 | argB | acetylglutamate kinase                                               |
| ABZ99706 | LEPBI_II0171 | -0.4927402649 | 9.4449306993  | 9.43452255170303e-06 | NA   | Sigma factor SigB regulation protein RsbU; phosphoserine phosphatase |
| ABZ99708 | LEPBI_II0173 | -0.3873917002 | 10.0869932371 | 0.000943029          | czcA | RND divalent metal cation efflux transporter                         |
| ABZ99709 | LEPBI_II0174 | -0.4009979951 | 7.8848817763  | 9.93753373093714e-05 | NA   | hypothetical protein                                                 |
| ABZ99712 | LEPBI_II0179 | -0.3239611719 | 8.5189217465  | 0.004681717          | NA   | diphosphate--fructose-6-phosphate 1-phosphotransferase               |
| ABZ99716 | LEPBI_II0183 | -0.3143557952 | 9.5726762034  | 0.004533346          | metH | B12-dependent methionine synthase                                    |
| ABZ99720 | LEPBI_II0187 | -0.3236886386 | 9.1459851016  | 0.0018070318         | NA   | methyl-accepting chemotaxis protein TlpA                             |
| ABZ99721 | LEPBI_II0188 | -0.4022486438 | 8.3365352098  | 9.91446625630244e-05 | NA   | outermembrane protein                                                |
| ABZ99722 | LEPBI_II0189 | -0.503676274  | 7.7926973938  | 5.04508219133025e-06 | NA   | drug/metabolite exporter                                             |
| ABZ99725 | LEPBI_II0192 | -0.5004246557 | 6.6390394899  | 0.0017037483         | NA   | hypothetical protein                                                 |
| ABZ99726 | LEPBI_II0193 | -0.3950116583 | 9.2828542905  | 7.56588434837131e-05 | NA   | methyl-accepting chemotaxis protein; signal peptide                  |
| ABZ99727 | LEPBI_II0194 | -0.3463713039 | 9.1690459285  | 0.0006079672         | NA   | methyl-accepting chemotaxis protein; signal peptide                  |
| ABZ99728 | LEPBI_II0195 | -0.2560790772 | 8.3109541411  | 0.0083797622         | NA   | hypothetical protein                                                 |
| ABZ99731 | LEPBI_II0198 | -0.4542667589 | 8.1119952872  | 7.79334221119504e-07 | NA   | short-chain dehydrogenase/reductase SDR                              |
| ABZ99732 | LEPBI_II0199 | -0.3903450394 | 6.8544520113  | 0.0043517033         | NA   | 3-oxoacyl-[acyl-carrier protein] reductase                           |
| ABZ99735 | LEPBI_II0202 | -0.4210142479 | 8.5894121594  | 0.0001596724         | kamA | L-lysine 2,3-aminomutase                                             |
| ABZ99736 | LEPBI_II0203 | -0.3839232104 | 6.8976025943  | 0.0017503402         | NA   | signal peptide                                                       |
| ABZ99740 | LEPBI_II0207 | -0.2793411951 | 8.533296325   | 0.0078757222         | NA   | two-component sensor histidine kinase                                |
| ABZ99741 | LEPBI_II0208 | -0.2997760806 | 8.5759097626  | 0.0055811374         | deaD | DEAD/DEAH box helicase                                               |
| ABZ99742 | LEPBI_II0209 | -0.3912451483 | 8.2018907443  | 0.0003476512         | NA   | cyclopropane-fatty-acyl-phospholipid synthase                        |
| ABZ99743 | LEPBI_II0210 | -0.4046302968 | 7.7680262763  | 0.0001416607         | NA   | hypothetical protein                                                 |
| ABZ99744 | LEPBI_II0211 | -0.3807459573 | 7.2969692844  | 0.0026456286         | NA   | 3-oxoacyl-[acyl-carrier protein] reductase                           |
| ABZ99745 | LEPBI_II0212 | -0.3482961249 | 7.5141099756  | 0.0048006743         | NA   | Alcohol dehydrogenase (Zinc-containing alcohol dehydrogenase family) |
| ABZ99748 | LEPBI_II0215 | -1.2472755709 | 6.8462999763  | 7.35602908549769e-10 | NA   | hypothetical protein                                                 |
| ABZ99752 | LEPBI_II0219 | -0.5312022356 | 6.3418600619  | 0.001036133          | NA   | hypothetical protein                                                 |
| ABZ99753 | LEPBI_II0220 | -0.3076922665 | 8.7027765976  | 0.003012724          | NA   | hypothetical protein                                                 |
| ABZ99757 | LEPBI_II0224 | -0.4348459309 | 8.103866841   | 5.60163502933227e-05 | NA   | hypothetical protein                                                 |
| ABZ99758 | LEPBI_II0225 | -0.4631875691 | 6.1291112402  | 0.0074247643         | NA   | hypothetical protein                                                 |
| ABZ99759 | LEPBI_II0226 | -0.3291590041 | 8.0751203944  | 0.0019125232         | NA   | hypothetical protein                                                 |
| ABZ99760 | LEPBI_II0227 | -0.3323610579 | 7.8648316161  | 0.0053248034         | NA   | hypothetical protein                                                 |
| ABZ99765 | LEPBI_II0232 | -0.5785177502 | 7.3035258189  | 2.43357386577175e-06 | NA   | signal peptide                                                       |
| ABZ99769 | LEPBI_II0236 | -0.4048360572 | 6.7948499739  | 0.0042920489         | NA   | hypothetical protein                                                 |
| ABZ99781 | LEPBI_II0248 | -0.3929791218 | 8.498409416   | 0.000815605          | NA   | hypothetical protein                                                 |
| ABZ99783 | LEPBI_II0250 | -0.5952672345 | 7.247079387   | 2.5066038931868e-06  | NA   | hypothetical protein                                                 |
| ABZ99786 | LEPBI_II0253 | -0.3967688672 | 7.6061416954  | 0.0063862457         | NA   | hypothetical protein                                                 |
| ABZ99787 | LEPBI_II0254 | -0.3796268657 | 8.291837379   | 9.93753373093714e-05 | NA   | glycosyl transferase                                                 |
| ABZ99788 | LEPBI_II0255 | -0.4273808737 | 6.4791615574  | 0.002487851          | NA   | hypothetical protein                                                 |
| ABZ99789 | LEPBI_II0256 | -0.3275360481 | 8.6661173164  | 0.0055764542         | NA   | hypothetical protein                                                 |
| ABZ99795 | LEPBI_II0262 | -0.4399436877 | 9.1438382331  | 3.3857679122078e-06  | NA   | hypothetical protein                                                 |
| ABZ99796 | LEPBI_II0263 | -0.3268040058 | 7.9185953632  | 0.0049370219         | NA   | hypothetical protein                                                 |
| ABZ99798 | LEPBI_II0265 | -0.4491618035 | 9.2141080383  | 0.0001723272         | NA   | methyl-accepting chemotaxis protein                                  |
| ABZ99801 | LEPBI_II0268 | -0.2876941391 | 8.8391420368  | 0.0048478149         | NA   | C-terminal processing peptidase                                      |

BvsP\_48

|          |              |               |              |                      |      |                                |
|----------|--------------|---------------|--------------|----------------------|------|--------------------------------|
| ABZ99809 | LEPBI_II0276 | -0.3343672794 | 8.5144601834 | 0.0015852622         | NA   | hypothetical protein           |
| ABZ99810 | LEPBI_II0277 | -0.388390655  | 8.724654322  | 0.0001226758         | algI | alginate O-acetyltransferase   |
| ABZ99823 | LEPBI_p0009  | 1.0118423181  | 4.6961934405 | 1.56039193023144e-05 | NA   | hypothetical protein           |
| ABZ99826 | LEPBI_p0012  | 0.6177657011  | 6.6735418498 | 0.0005847176         | hemS | Hemin degradation protein HemS |

**Table S5 (cont.).** Differentially expressed genes in BvsP\_120.

| Gene     | Synonym     | logFC         | logCPM       | FDR                  | Symbol | Product                                                      |
|----------|-------------|---------------|--------------|----------------------|--------|--------------------------------------------------------------|
| ABZ96158 | LEPBI_I0011 | -0.5004827861 | 6.9621288105 | 0.0003063382         | NA     | putative transcriptional regulator                           |
| ABZ96162 | LEPBI_I0015 | -0.3587948725 | 6.7063102854 | 0.0044132317         | NA     | hypothetical protein                                         |
| ABZ96187 | LEPBI_I0040 | -0.4258958458 | 6.8902257033 | 0.0002947639         | NA     | putative signal peptide                                      |
| ABZ96222 | LEPBI_I0075 | -0.3450421164 | 7.2247282366 | 0.0028411542         | NA     | putative nucleotide-diphospho-sugar transferase              |
| ABZ96228 | LEPBI_I0081 | -0.5770808538 | 6.1539470333 | 0.0020740618         | NA     | putative response regulator                                  |
| ABZ96239 | LEPBI_I0092 | -0.2675080294 | 8.8887410313 | 0.0058228895         | pyrD   | dihydroorotate dehydrogenase 2                               |
| ABZ96257 | LEPBI_I0110 | -0.7723418584 | 8.2890135629 | 5.83934591985084e-14 | NA     | hypothetical protein                                         |
| ABZ96261 | LEPBI_I0114 | -0.3763911911 | 8.0396991711 | 0.0054813602         | NA     | sodium/bile acid cotransporter family protein                |
| ABZ96262 | LEPBI_I0115 | -0.478537662  | 5.8445996291 | 0.0043997932         | NA     | hypothetical protein                                         |
| ABZ96271 | LEPBI_I0124 | -0.6278125557 | 6.6095732391 | 5.05592469442429e-05 | NA     | hypothetical protein                                         |
| ABZ96278 | LEPBI_I0132 | -0.7603864466 | 5.5513463118 | 6.51490026298288e-06 | NA     | hypothetical protein                                         |
| ABZ96287 | LEPBI_I0142 | -0.3477810861 | 7.9013797053 | 0.0076034178         | glpF   | glycerol uptake facilitator protein                          |
| ABZ96289 | LEPBI_I0144 | 2.0605681113  | 7.8637143239 | 9.16952420795051e-09 | NA     | hypothetical protein                                         |
| ABZ96292 | LEPBI_I0147 | -0.3491975588 | 7.6642546583 | 0.0028739347         | exbD2  | biopolymer transport ExbD protein                            |
| ABZ96299 | LEPBI_I0154 | -0.2720856946 | 8.3959859272 | 0.0059546873         | add1   | adenosine deaminase                                          |
| ABZ96307 | LEPBI_I0162 | -0.4341443762 | 7.7183706169 | 2.32521122475938e-05 | NA     | hypothetical protein                                         |
| ABZ96320 | LEPBI_I0175 | -0.3622632459 | 7.111661173  | 0.0014457866         | NA     | hypothetical protein                                         |
| ABZ96336 | LEPBI_I0191 | -0.4827935024 | 5.706934936  | 0.0053230573         | NA     | hypothetical protein                                         |
| ABZ96341 | LEPBI_I0196 | -0.3536632561 | 8.0592918224 | 0.0003850803         | motA   | chemotaxis MotA protein                                      |
| ABZ96342 | LEPBI_I0197 | -0.3742507747 | 7.668812202  | 0.0003063382         | motB   | flagellar motor protein MotB                                 |
| ABZ96356 | LEPBI_I0211 | -0.2559880835 | 8.0495632299 | 0.0082860263         | NA     | hypothetical protein                                         |
| ABZ96383 | LEPBI_I0238 | 1.0912475533  | 8.4718942078 | 1.71386370161502e-05 | ispE   | 4-diphosphocytidyl-2-C-methyl-D-erythritol kinase            |
| ABZ96387 | LEPBI_I0242 | -0.2910082313 | 8.8705302779 | 0.0016486715         | NA     | putative sodium:solute symporter                             |
| ABZ96391 | LEPBI_I0246 | -0.2921871022 | 7.7471056402 | 0.0029818936         | NA     | hypothetical protein                                         |
| ABZ96392 | LEPBI_I0247 | -0.3729320751 | 8.194246796  | 4.49997988723769e-05 | NA     | hypothetical protein                                         |
| ABZ96400 | LEPBI_I0255 | -0.5295681042 | 7.440287296  | 6.59519972216601e-07 | NA     | hypothetical protein                                         |
| ABZ96412 | LEPBI_I0267 | 0.454858211   | 9.2729552605 | 0.007102486          | NA     | putative signal peptide                                      |
| ABZ96419 | LEPBI_I0275 | 2.3398462799  | 8.7558557537 | 9.98482187635889e-06 | NA     | hypothetical protein                                         |
| ABZ96420 | LEPBI_I0276 | -0.4102508853 | 7.9624156938 | 0.0001140561         | NA     | hypothetical protein                                         |
| ABZ96421 | LEPBI_I0277 | 0.3731184526  | 7.6638244092 | 0.0021816041         | NA     | hypothetical protein                                         |
| ABZ96433 | LEPBI_I0289 | 0.879161184   | 7.5568783639 | 0.0003898781         | NA     | hypothetical protein                                         |
| ABZ96445 | LEPBI_I0301 | -0.506559252  | 5.3720011992 | 0.0028411542         | NA     | hypothetical protein                                         |
| ABZ96457 | LEPBI_I0313 | 0.7490871993  | 8.6493150698 | 3.04545470130188e-11 | NA     | putative signal peptide                                      |
| ABZ96471 | LEPBI_I0327 | -0.2755210124 | 8.1320723898 | 0.0093172659         | dppC   | ABC transporter permease                                     |
| ABZ96508 | LEPBI_I0365 | -0.33171967   | 7.548560294  | 0.0017562659         | NA     | putative negative transcriptional regulator                  |
| ABZ96511 | LEPBI_I0368 | -0.3960663084 | 6.6345834706 | 0.0024131652         | NA     | hypothetical protein                                         |
| ABZ96523 | LEPBI_I0381 | -0.516444054  | 5.4813042618 | 0.0032052843         | NA     | hypothetical protein                                         |
| ABZ96546 | LEPBI_I0404 | 0.5753770984  | 8.561895118  | 3.66677906967842e-07 | NA     | hypothetical protein                                         |
| ABZ96573 | LEPBI_I0431 | -0.5516027611 | 8.1405417145 | 0.007671178          | NA     | hypothetical protein                                         |
| ABZ96627 | LEPBI_I0489 | -0.3224102994 | 8.4841156601 | 0.0003532647         | NA     | hypothetical protein                                         |
| ABZ96653 | LEPBI_I0515 | 0.5404153607  | 7.635377771  | 0.0005830755         | rpsT   | 30S ribosomal protein S20                                    |
| ABZ96661 | LEPBI_I0523 | -0.3669409155 | 8.9086831264 | 0.0001140561         | NA     | putative serine-type endopeptidase                           |
| ABZ96669 | LEPBI_I0531 | 0.4566256608  | 7.0787833788 | 0.000892425          | NA     | hypothetical protein                                         |
| ABZ96670 | LEPBI_I0532 | 0.4592877715  | 8.1171928644 | 0.0007819714         | NA     | putative signal peptide                                      |
| ABZ96675 | LEPBI_I0537 | 0.4154387388  | 9.008073391  | 5.20831692174193e-05 | NA     | hypothetical protein                                         |
| ABZ96676 | LEPBI_I0538 | 0.2703612702  | 8.9713009829 | 0.0054813602         | NA     | putative FAD-linked oxidase                                  |
| ABZ96699 | LEPBI_I0561 | 0.4381827826  | 9.1667038655 | 2.01789277718986e-05 | NA     | hypothetical protein                                         |
| ABZ96722 | LEPBI_I0584 | 0.3608365597  | 8.0343663942 | 0.0002324256         | NA     | putative S-adenosyl-L-methionine-dependent methyltransferase |
| ABZ96727 | LEPBI_I0590 | 0.5215733151  | 5.8478277183 | 0.0027790524         | NA     | hypothetical protein                                         |
| ABZ96784 | LEPBI_I0651 | -0.2745219262 | 8.1363724317 | 0.0044505911         | NA     | hypothetical protein                                         |



## BvsP\_120

|          |              |               |              |                      |       |                                                            |
|----------|--------------|---------------|--------------|----------------------|-------|------------------------------------------------------------|
| ABZ96815 | LEPBI_I0683  | 0.494760358   | 7.9980262479 | 1.31822210999569e-05 | NA    | putative lipoprotein                                       |
| ABZ96824 | LEPBI_I0692  | -0.3516587097 | 6.7954754043 | 0.0098173821         | NA    | hypothetical protein                                       |
| ABZ96830 | LEPBI_I0698  | 0.286532168   | 7.9643716776 | 0.0092497318         | NA    | hypothetical protein                                       |
| ABZ96853 | LEPBI_I0721  | 0.3385683779  | 8.1684107458 | 0.0046665043         | NA    | putative NAD-dependent deacetylase                         |
| ABZ96895 | LEPBI_I0764  | -0.3153907617 | 8.6616390086 | 0.0010813264         | pykF  | pyruvate kinase                                            |
| ABZ96899 | LEPBI_I0768  | -0.45892787   | 8.0289807663 | 1.27855305053055e-07 | NA    | hypothetical protein                                       |
| ABZ96912 | LEPBI_I0782  | -0.2959771927 | 8.1573744179 | 0.0011561945         | NA    | hypothetical protein                                       |
| ABZ96913 | LEPBI_I0783  | -0.2660955881 | 8.3025210536 | 0.0084581508         | NA    | hypothetical protein                                       |
| ABZ96919 | LEPBI_I0789  | 0.3797501448  | 8.36000227   | 0.0011561945         | NA    | hypothetical protein                                       |
| ABZ96930 | LEPBI_I0802  | 0.537193164   | 7.8346278004 | 1.03041521325514e-05 | atpE  | ATP synthase F0 subunit C                                  |
| ABZ96932 | LEPBI_I0804  | 0.4181898303  | 7.7343555693 | 0.0017643161         | atpH  | F0F1 ATP synthase subunit delta                            |
| ABZ96933 | LEPBI_I0805  | 0.2766371152  | 8.8001101711 | 0.0076123973         | atpA  | F0F1 ATP synthase subunit alpha                            |
| ABZ96935 | LEPBI_I0807  | 0.2812641385  | 8.7187025318 | 0.0084065323         | atpD  | F0F1 ATP synthase subunit beta                             |
| ABZ96944 | LEPBI_I0816  | -0.4162261386 | 7.1444819117 | 0.0010813264         | NA    | hypothetical protein                                       |
| ABZ96945 | LEPBI_Ia0817 | 0.3080332801  | 8.9245698738 | 0.0030279285         | ompL1 | outer membrane protein                                     |
| ABZ96962 | LEPBI_I0835  | 0.4746802818  | 7.7051666859 | 7.57367514275877e-05 | NA    | TetR family transcriptional regulator                      |
| ABZ96966 | LEPBI_I0839  | 0.4011399063  | 7.7460831614 | 7.66348856414957e-05 | NA    | putative glycosyl transferase                              |
| ABZ96976 | LEPBI_I0849  | -0.2812566533 | 8.5707959044 | 0.0046119217         | NA    | ABC transporter ATP binding protein/permease               |
| ABZ96986 | LEPBI_I0859  | 0.5178020285  | 8.5895762377 | 4.0277829735504e-05  | NA    | hypothetical protein                                       |
| ABZ96994 | LEPBI_I0869  | 0.4288205961  | 7.7972620919 | 9.96548764614356e-05 | NA    | hypothetical protein                                       |
| ABZ96996 | LEPBI_I0871  | 0.3346437356  | 8.3998819939 | 0.0003898781         | NA    | CRP family transcriptional regulator                       |
| ABZ97010 | LEPBI_I0885  | 0.5331205018  | 9.3602059476 | 0.0029888831         | NA    | hypothetical protein                                       |
| ABZ97026 | LEPBI_I0901  | 0.421393682   | 9.3535406276 | 5.15212416420026e-05 | NA    | two-component sensor protein                               |
| ABZ97029 | LEPBI_I0904  | 0.4340502882  | 7.8713621332 | 0.0001345808         | NA    | putative sigma factor                                      |
| ABZ97030 | LEPBI_I0905  | 0.7142772435  | 6.8601264464 | 2.12125592542439e-07 | NA    | putative anti-sigma factor antagonist                      |
| ABZ97039 | LEPBI_I0915  | 0.3285666032  | 8.837961437  | 0.0005246082         | NA    | putative two-component sensor molecule                     |
| ABZ97058 | LEPBI_I0934  | 0.4793919601  | 5.6268364943 | 0.0082206676         | NA    | hypothetical protein                                       |
| ABZ97075 | LEPBI_I0951  | 0.4804869892  | 7.3313405598 | 0.0009975244         | gmk   | guanylate kinase                                           |
| ABZ97081 | LEPBI_I0957  | 2.1282336693  | 9.281950417  | 1.32477852136588e-18 | NA    | hypothetical protein                                       |
| ABZ97098 | LEPBI_I0974  | 0.3885846048  | 7.1308126772 | 0.0082206676         | tatA  | Sec-independent protein secretion pathway component TatA/E |
| ABZ97100 | LEPBI_I0976  | 0.2505494867  | 8.210910781  | 0.0095365389         | NA    | putative signal peptide                                    |
| ABZ97150 | LEPBI_I1027  | -0.5928395646 | 7.5107175096 | 1.04735356354059e-05 | NA    | hypothetical protein                                       |
| ABZ97198 | LEPBI_I1075  | 0.2473972456  | 8.2093778511 | 0.0082206676         | NA    | putative methyl-accepting chemotaxis protein               |
| ABZ97205 | LEPBI_I1084  | 0.4186248952  | 8.329559309  | 1.42373415945619e-06 | NA    | hypothetical protein                                       |
| ABZ97250 | LEPBI_I1132  | 0.348075466   | 7.175594265  | 0.0068590506         | etfA  | electron transfer flavoprotein subunit alpha               |
| ABZ97266 | LEPBI_I1150  | -0.3634332474 | 7.8572688471 | 0.0025507974         | NA    | putative cAMP binding protein                              |
| ABZ97287 | LEPBI_I1171  | 0.4834331976  | 8.7129464391 | 3.43353500980654e-07 | hemA  | glutamyl-tRNA reductase                                    |
| ABZ97291 | LEPBI_I1175  | 0.9858684154  | 9.6792875369 | 0.0005964039         | NA    | hypothetical protein                                       |
| ABZ97294 | LEPBI_I1178  | 0.3051613478  | 7.9068666418 | 0.0052089101         | sirA  | siroheme synthase                                          |
| ABZ97304 | LEPBI_I1188  | 0.4146898436  | 8.3563120906 | 5.15212416420026e-05 | sbp   | sulfate ABC transporter substrate-binding protein          |
| ABZ97313 | LEPBI_I1197  | 0.444341838   | 6.483242449  | 0.0074919595         | NA    | putative anti-sigma factor antagonist                      |
| ABZ97333 | LEPBI_I1219  | 0.3295528847  | 8.3426694355 | 0.0009255343         | NA    | putative sensory transduction histidine kinase             |
| ABZ97345 | LEPBI_I1231  | 0.27992056    | 8.571468184  | 0.0029818936         | NA    | hypothetical protein                                       |
| ABZ97353 | LEPBI_I1240  | 0.4196629143  | 7.4850084556 | 0.0010727767         | NA    | putative dihydrofolate reductase                           |
| ABZ97358 | LEPBI_I1245  | 0.3637326605  | 7.7018733743 | 0.002922699          | NA    | hypothetical protein                                       |
| ABZ97362 | LEPBI_I1250  | -0.4936634238 | 7.2146052061 | 0.0001541092         | NA    | hypothetical protein                                       |
| ABZ97364 | LEPBI_I1252  | 0.3736896718  | 8.5399821618 | 2.24214159230944e-05 | NA    | putative signal peptide                                    |
| ABZ97388 | LEPBI_I1278  | 0.2752814022  | 8.4014578635 | 0.0094625268         | NA    | hypothetical protein                                       |
| ABZ97396 | LEPBI_I1286  | -0.5381504538 | 6.810047695  | 0.0011303821         | NA    | hypothetical protein                                       |
| ABZ97414 | LEPBI_I1304  | 0.6098169372  | 5.4819084829 | 0.0046119738         | nuoK  | NADH-quinone oxidoreductase subunit K                      |
| ABZ97427 | LEPBI_I1317  | 0.6335904967  | 7.6509028855 | 0.0086715178         | NA    | hypothetical protein                                       |
| ABZ97431 | LEPBI_I1321  | 0.6351426829  | 6.2756291366 | 1.36761458390032e-05 | NA    | putative anti-sigma factor antagonist                      |
| ABZ97449 | LEPBI_I1339  | -0.2801752521 | 7.9096627658 | 0.005248281          | NA    | hypothetical protein                                       |

## BvsP\_120

|          |             |               |              |                      |       |                                                              |
|----------|-------------|---------------|--------------|----------------------|-------|--------------------------------------------------------------|
| ABZ97468 | LEPBI_I1358 | 0.4947536749  | 7.691889098  | 0.0002911909         | ahpC2 | alkyl hydroperoxide reductase subunit C                      |
| ABZ97477 | LEPBI_I1368 | 0.4190845298  | 7.2820459311 | 0.0002753902         | NA    | putative cytochrome c3                                       |
| ABZ97541 | LEPBI_I1433 | -0.3206829803 | 8.2793048531 | 0.0006993374         | NA    | hypothetical protein                                         |
| ABZ97553 | LEPBI_I1445 | 0.5256174398  | 7.0961037277 | 1.00111261317932e-05 | NA    | hypothetical protein                                         |
| ABZ97567 | LEPBI_I1460 | 0.4462248886  | 8.4802439142 | 0.00023718           | NA    | hypothetical protein                                         |
| ABZ97570 | LEPBI_I1463 | -0.3972696968 | 7.86280289   | 3.82061579241368e-05 | NA    | putative ribosomal subunit pseudouridine synthase            |
| ABZ97604 | LEPBI_I1497 | 0.4923235703  | 7.4631599078 | 7.21534581289544e-05 | NA    | ABC transporter ATP-binding protein                          |
| ABZ97608 | LEPBI_I1501 | -0.3344710383 | 6.6395552255 | 0.0084714983         | ruvA  | Holliday junction DNA helicase RuvA                          |
| ABZ97630 | LEPBI_I1523 | 0.7477214656  | 6.8410351384 | 7.21534581289544e-05 | NA    | hypothetical protein                                         |
| ABZ97645 | LEPBI_I1538 | -0.3774496687 | 7.9163682894 | 0.0006088059         | NA    | putative S-adenosyl-L-methionine-dependent methyltransferase |
| ABZ97668 | LEPBI_I1561 | 1.2748213282  | 6.2211385294 | 7.86768133727318e-05 | NA    | hypothetical protein                                         |
| ABZ97671 | LEPBI_I1564 | 1.69573447    | 6.2415586079 | 1.37893679685547e-08 | rpsU  | 30S ribosomal protein S21                                    |
| ABZ97681 | LEPBI_I1574 | -0.7250295129 | 6.3430604353 | 1.62852735964469e-08 | NA    | hypothetical protein                                         |
| ABZ97682 | LEPBI_I1575 | -0.2613592897 | 8.8403062091 | 0.0090648343         | NA    | putative phosphodiesterase or phosphatase                    |
| ABZ97700 | LEPBI_I1593 | -0.2707961524 | 8.3438819231 | 0.0030496603         | metY  | O-acetylhomoserine sulfhydrylase                             |
| ABZ97703 | LEPBI_I1596 | -0.4279671769 | 7.0980862131 | 0.0056927529         | NA    | hypothetical protein                                         |
| ABZ97732 | LEPBI_I1625 | -0.3145306344 | 8.0190484779 | 0.0010231909         | leuC2 | isopropylmalate isomerase large subunit                      |
| ABZ97744 | LEPBI_I1637 | -0.3061483011 | 7.6216152918 | 0.0079209101         | NA    | putative glycosyltransferase                                 |
| ABZ97790 | LEPBI_I1683 | -0.311385845  | 8.3825894498 | 0.0028739347         | ftsA2 | cell division protein FtsA                                   |
| ABZ97796 | LEPBI_I1689 | -0.9441102863 | 5.3304241323 | 1.20914933729027e-06 | NA    | hypothetical protein                                         |
| ABZ97806 | LEPBI_I1700 | -0.3699569159 | 6.4361794058 | 0.0080789211         | NA    | hypothetical protein                                         |
| ABZ97820 | LEPBI_I1714 | 0.3492968363  | 6.8304671701 | 0.0091397466         | NA    | hypothetical protein                                         |
| ABZ97847 | LEPBI_I1741 | 0.4062902193  | 6.7762049247 | 0.0082860263         | NA    | putative anti-sigma factor antagonist                        |
| ABZ97862 | LEPBI_I1756 | -0.2648163748 | 8.6740266574 | 0.0059546873         | murC  | UDP-N-acetylmuramate--L-alanine ligase                       |
| ABZ97865 | LEPBI_I1759 | -0.3602269757 | 7.4184519401 | 0.0008725906         | mraY  | phospho-N-acetylmuramoyl-pentapeptide-transferase            |
| ABZ97870 | LEPBI_I1764 | 0.3250714117  | 8.1274781223 | 0.005345247          | cheR  | chemotaxis protein methyltransferase                         |
| ABZ97873 | LEPBI_I1767 | -0.2883494105 | 8.7726226654 | 0.0074994184         | NA    | ammonium ABC transporter permease                            |
| ABZ97875 | LEPBI_I1769 | -0.2697187001 | 8.3331070104 | 0.0079615906         | NA    | hypothetical protein                                         |
| ABZ97880 | LEPBI_I1774 | 0.5190850854  | 6.9144571884 | 0.0018086298         | NA    | putative ribosomal protein                                   |
| ABZ97885 | LEPBI_I1779 | 0.5630459199  | 6.4327019678 | 0.0001003934         | NA    | putative nicotinate-nucleotide adenyltransferase             |
| ABZ97888 | LEPBI_I1782 | -0.5176340675 | 5.9732500918 | 0.0010231909         | NA    | hypothetical protein                                         |
| ABZ97898 | LEPBI_I1792 | -0.3184330466 | 7.2403314206 | 0.0041482571         | NA    | hypothetical protein                                         |
| ABZ97924 | LEPBI_I1818 | 0.2637419295  | 8.4685618137 | 0.0051896523         | NA    | putative poly(beta-D-mannuronate) O-acetylase                |
| ABZ97939 | LEPBI_I1833 | -0.2756064688 | 7.7839539972 | 0.0062129536         | NA    | hypothetical protein                                         |
| ABZ97942 | LEPBI_I1836 | -0.3164687121 | 7.9762608372 | 0.0040007243         | NA    | putative acyl-CoA dehydrogenase                              |
| ABZ97950 | LEPBI_I1844 | -0.2651486803 | 8.0886165341 | 0.007029352          | NA    | hypothetical protein                                         |
| ABZ97951 | LEPBI_I1845 | -0.3169443502 | 8.0356859749 | 0.0005832955         | leuA  | 2-isopropylmalate synthase                                   |
| ABZ97952 | LEPBI_I1846 | -0.3200925371 | 7.3132920096 | 0.0029818936         | hisC  | histidinol-phosphate aminotransferase                        |
| ABZ97963 | LEPBI_I1859 | -0.3305019559 | 7.3813533047 | 0.0051383982         | NA    | putative signal peptide                                      |
| ABZ98012 | LEPBI_I1909 | 0.9560629248  | 3.8758311372 | 0.0060952823         | NA    | putative BolA-like protein                                   |
| ABZ98042 | LEPBI_I1939 | 0.3985913007  | 7.6291786255 | 0.0035279915         | rpoA  | DNA-directed RNA polymerase subunit alpha                    |
| ABZ98046 | LEPBI_I1943 | 1.1511826645  | 7.0649249356 | 1.6501570143038e-13  | infA  | translation initiation factor IF-1                           |
| ABZ98047 | LEPBI_I1944 | 0.7265295898  | 7.582434287  | 0.0005269942         | adk   | adenylate kinase                                             |
| ABZ98071 | LEPBI_I1968 | 0.5299191662  | 7.8629596368 | 0.0001941983         | rpsG  | 30S ribosomal protein S7                                     |
| ABZ98106 | LEPBI_I2004 | 0.3471916465  | 8.9576062915 | 0.0092592744         | NA    | hypothetical protein                                         |
| ABZ98145 | LEPBI_I2043 | 0.3126561593  | 8.1802768376 | 0.0010033301         | NA    | putative acyltransferase                                     |
| ABZ98172 | LEPBI_I2070 | 0.4931074515  | 8.6856363965 | 6.59519972216601e-07 | NA    | hypothetical protein                                         |
| ABZ98202 | LEPBI_I2100 | 0.5738763781  | 6.9863550498 | 9.22991131858375e-05 | rpsF  | 30S ribosomal protein S6                                     |
| ABZ98229 | LEPBI_I2127 | 0.4170548039  | 7.8895959439 | 1.16376698335723e-05 | NA    | hypothetical protein                                         |
| ABZ98268 | LEPBI_I2168 | 0.5543056795  | 6.0291875888 | 0.0013557755         | NA    | hypothetical protein                                         |
| ABZ98276 | LEPBI_I2177 | 0.3710547763  | 7.5113037713 | 0.0013434707         | NA    | hypothetical protein                                         |
| ABZ98278 | LEPBI_I2179 | -0.5363296371 | 6.1121609277 | 0.0009723839         | NA    | hypothetical protein                                         |
| ABZ98292 | LEPBI_I2193 | 0.3260501374  | 8.9838272836 | 0.0008725906         | NA    | hypothetical protein                                         |

## BvsP\_120

|          |             |               |              |                      |       |                                                                |
|----------|-------------|---------------|--------------|----------------------|-------|----------------------------------------------------------------|
| ABZ98316 | LEPBI_I2218 | 0.4281935102  | 6.6042303073 | 0.0097058514         | NA    | putative transcriptional regulator                             |
| ABZ98326 | LEPBI_I2229 | -0.3930152313 | 6.7546200893 | 0.0038591894         | NA    | hypothetical protein                                           |
| ABZ98331 | LEPBI_I2234 | -0.6378351665 | 4.9382457877 | 0.0058228895         | NA    | hypothetical protein                                           |
| ABZ98375 | LEPBI_I2280 | 0.4168751426  | 7.1885242585 | 0.0037450434         | NA    | hypothetical protein                                           |
| ABZ98395 | LEPBI_I2300 | 0.3936334659  | 7.289483981  | 0.0040732073         | trxA2 | thioredoxin                                                    |
| ABZ98453 | LEPBI_I2362 | 0.2456271308  | 8.7556402926 | 0.0091277516         | ilvB2 | acetolactate synthase large subunit                            |
| ABZ98462 | LEPBI_I2371 | -1.7616960196 | 4.6391423933 | 8.38129239825869e-17 | NA    | hypothetical protein                                           |
| ABZ98533 | LEPBI_I2444 | 0.325556606   | 7.8670450967 | 0.0039383443         | NA    | hypothetical protein                                           |
| ABZ98584 | LEPBI_I2497 | 0.3402544689  | 9.5188267052 | 0.0012687027         | ppc   | phosphoenolpyruvate carboxylase                                |
| ABZ98591 | LEPBI_I2505 | -0.4636956631 | 5.9428906308 | 0.0029818936         | NA    | hypothetical protein                                           |
| ABZ98625 | LEPBI_I2544 | 0.2723654722  | 9.2133021353 | 0.0054813602         | NA    | putative DNA repair helicase                                   |
| ABZ98666 | LEPBI_I2585 | 0.9720659576  | 6.1305232359 | 0.0052369147         | acpP  | acyl carrier protein                                           |
| ABZ98680 | LEPBI_I2601 | 0.3291577532  | 7.5127624705 | 0.005248281          | NA    | hypothetical protein                                           |
| ABZ98689 | LEPBI_I2610 | 0.4009911346  | 8.9900237414 | 6.36544411039116e-06 | NA    | membrane-associated Zn-dependent metalloprotease               |
| ABZ98692 | LEPBI_I2613 | -0.4420167029 | 5.7952043528 | 0.0082206676         | uppS  | undecaprenyl pyrophosphate synthase                            |
| ABZ98697 | LEPBI_I2618 | 0.6874555375  | 6.8626622771 | 0.0003898781         | NA    | putative signal peptide                                        |
| ABZ98708 | LEPBI_I2629 | 0.6197047826  | 7.6663611145 | 8.00741067821248e-07 | NA    | rhodanese-like domain-containing protein                       |
| ABZ98709 | LEPBI_I2630 | -0.2982844614 | 8.00753974   | 0.0059546873         | NA    | putative hydroxyacylglutathione hydrolase                      |
| ABZ98712 | LEPBI_I2633 | 0.4070903933  | 8.0872755338 | 0.00098092           | msrA2 | peptide methionine sulfoxide reductase MsrA                    |
| ABZ98724 | LEPBI_I2645 | 0.8022721764  | 7.3781310611 | 3.42715306700497e-08 | acpS  | holo-[acyl-carrier-protein] synthase                           |
| ABZ98754 | LEPBI_I2676 | 0.6528368148  | 8.6629562717 | 1.87995337994497e-07 | NA    | CarD family transcriptional regulator                          |
| ABZ98759 | LEPBI_I2681 | 0.5521296461  | 7.5907715913 | 5.79339860956089e-05 | ctaF  | cytochrome c oxidase polypeptide IVB                           |
| ABZ98771 | LEPBI_I2693 | 0.5956358893  | 6.880796331  | 3.55004568369791e-06 | NA    | hypothetical protein                                           |
| ABZ98804 | LEPBI_I2726 | -0.3553242607 | 7.8695769031 | 0.0005982467         | NA    | hypothetical protein                                           |
| ABZ98840 | LEPBI_I2762 | -0.3423628049 | 8.1605496225 | 0.000275716          | NA    | putative iron-regulated membrane protein                       |
| ABZ98851 | LEPBI_I2774 | -0.666299587  | 7.3436874777 | 1.28988609770586e-08 | moaA  | molybdenum cofactor biosynthesis protein A                     |
| ABZ98867 | LEPBI_I2790 | -0.3912037897 | 6.9076248179 | 0.0095535037         | NA    | putative sulfide quinone reductase                             |
| ABZ98878 | LEPBI_I2801 | 0.53113126    | 5.4032309869 | 0.004214287          | rbpA1 | RNA-binding protein                                            |
| ABZ98893 | LEPBI_I2818 | -0.4190354231 | 7.2377712193 | 0.000101318          | NA    | hypothetical protein                                           |
| ABZ98909 | LEPBI_I2838 | 0.5033014613  | 6.5804017383 | 0.0001140561         | ptsN  | PTS system transporter subunit IIA                             |
| ABZ98960 | LEPBI_I2891 | 0.3151714782  | 8.84874063   | 0.0009630779         | icd   | isocitrate dehydrogenase                                       |
| ABZ98975 | LEPBI_I2906 | 0.4053266469  | 8.8711003382 | 6.04399516589403e-05 | NA    | hypothetical protein                                           |
| ABZ98979 | LEPBI_I2910 | 0.4674824599  | 8.2095073495 | 7.05958228158738e-05 | NA    | putative transporter                                           |
| ABZ98994 | LEPBI_I2925 | -0.3371458427 | 7.3406666628 | 0.0013230533         | msrA1 | peptide methionine sulfoxide reductase MsrA                    |
| ABZ98996 | LEPBI_I2927 | 3.1758071978  | 8.8006624451 | 4.19359519202343e-12 | NA    | hypothetical protein                                           |
| ABZ99001 | LEPBI_I2932 | 0.3784295768  | 8.8679048014 | 0.0032542728         | NA    | RNA polymerase ECF-type sigma factor                           |
| ABZ99004 | LEPBI_I2935 | 0.3741096515  | 8.9862083644 | 0.000219236          | NA    | hypothetical protein                                           |
| ABZ99014 | LEPBI_I2946 | -0.4199914657 | 8.3321432166 | 0.0002136427         | fliG1 | flagellar motor switch protein FliG                            |
| ABZ99023 | LEPBI_I2955 | 0.4340186168  | 7.5301055695 | 0.0001722823         | norC  | nitric oxide reductase, cytochrome c-containing subunit        |
| ABZ99054 | LEPBI_I2987 | 0.4854762278  | 6.1528032782 | 0.0025553633         | NA    | hypothetical protein                                           |
| ABZ99079 | LEPBI_I3012 | -0.4206209675 | 7.6128738127 | 6.32884811962751e-05 | NA    | putative two-component response regulator                      |
| ABZ99080 | LEPBI_I3013 | 0.5371695767  | 7.7516830312 | 4.4406489489337e-08  | NA    | putative signal peptide                                        |
| ABZ99082 | LEPBI_I3016 | -0.4055482461 | 6.3561509552 | 0.0021607919         | NA    | putative signal peptide                                        |
| ABZ99113 | LEPBI_I3047 | 0.4989748564  | 7.8808125827 | 0.0009236461         | NA    | hypothetical protein                                           |
| ABZ99124 | LEPBI_I3058 | -0.5752004796 | 5.0261390985 | 0.0094173014         | NA    | hypothetical protein                                           |
| ABZ99175 | LEPBI_I3109 | -0.4963198142 | 6.9561742253 | 4.95508234108735e-06 | NA    | putative signal peptide                                        |
| ABZ99179 | LEPBI_I3113 | 0.4998455268  | 6.6085493405 | 0.0039383443         | NA    | hypothetical protein                                           |
| ABZ99225 | LEPBI_I3160 | 0.3386308559  | 8.7179847787 | 0.0022513701         | NA    | putative ABC transporter periplasmic phosphate-binding protein |
| ABZ99232 | LEPBI_I3167 | -0.6079086977 | 6.0192485143 | 3.70803602055551e-05 | NA    | hypothetical protein                                           |
| ABZ99248 | LEPBI_I3183 | -0.570868464  | 6.3620837308 | 1.89607476485205e-05 | NA    | hypothetical protein                                           |
| ABZ99251 | LEPBI_I3186 | 1.4922270776  | 8.321380916  | 8.216587493592e-08   | NA    | hypothetical protein                                           |
| ABZ99256 | LEPBI_I3191 | -0.6719912064 | 6.0504128859 | 1.08400974111352e-05 | NA    | putative ferredoxin-like protein, 2 Fe-2S                      |
| ABZ99259 | LEPBI_I3194 | -0.5087967461 | 7.0270623118 | 1.88874931997581e-05 | NA    | hypothetical protein                                           |

## BvsP\_120

|          |              |               |              |                      |       |                                                                          |
|----------|--------------|---------------|--------------|----------------------|-------|--------------------------------------------------------------------------|
| ABZ99265 | LEPBI_I3200  | 0.4384880051  | 8.6398336858 | 0.0027501385         | NA    | hypothetical protein                                                     |
| ABZ99275 | LEPBI_I3210  | -0.413754804  | 6.3532003318 | 0.0044177411         | csrA  | carbon storage regulator                                                 |
| ABZ99283 | LEPBI_I3218  | -0.4319404252 | 6.4514488171 | 0.0020740618         | NA    | hypothetical protein                                                     |
| ABZ99287 | LEPBI_I3222  | 0.3261627687  | 7.8164583803 | 0.002903737          | NA    | hypothetical protein                                                     |
| ABZ99319 | LEPBI_I3254  | -0.3742412025 | 9.1818383859 | 0.0014091479         | NA    | putative sugar transport protein                                         |
| ABZ99343 | LEPBI_I3278  | -0.4825638828 | 6.099774894  | 0.0009376137         | NA    | putative chemotaxis protein CheC                                         |
| ABZ99363 | LEPBI_I3298  | -0.439878993  | 8.4075640885 | 0.0004256592         | NA    | hypothetical protein                                                     |
| ABZ99370 | LEPBI_I3305  | -0.3223912428 | 7.5003742532 | 0.0082206676         | NA    | putative phosphoribosyl-AMP cyclohydrolase                               |
| ABZ99376 | LEPBI_I3311  | -0.4586314684 | 7.8524955551 | 0.0007081493         | NA    | hypothetical protein                                                     |
| ABZ99389 | LEPBI_I3324  | 0.6058280703  | 7.7358589513 | 6.11042585264906e-07 | NA    | hypothetical protein                                                     |
| ABZ99399 | LEPBI_I3335  | -0.377028914  | 8.2726394266 | 0.0026319204         | NA    | hypothetical protein                                                     |
| ABZ99409 | LEPBI_I3345  | -0.4334134953 | 7.0849435797 | 0.0003898781         | arsR3 | transcription regulator ArsR                                             |
| ABZ99419 | LEPBI_I3355  | -0.6093463886 | 6.395006823  | 2.09864317298447e-06 | NA    | TetR family transcriptional regulator                                    |
| ABZ99420 | LEPBI_I3356  | -0.4877666167 | 8.493032301  | 1.30353367302616e-06 | NA    | putative nitroreductase                                                  |
| ABZ99432 | LEPBI_I3368  | -0.4483413528 | 7.1475286481 | 8.87063727811892e-05 | NA    | ArsC family arsenate permease                                            |
| ABZ99455 | LEPBI_I3391  | -0.3617947419 | 6.6724550427 | 0.0096389528         | NA    | hypothetical protein                                                     |
| ABZ99472 | LEPBI_I3410  | -0.5333397967 | 6.1778947223 | 0.000801927          | NA    | putative transcription antitermination protein NusG                      |
| ABZ99477 | LEPBI_I3415  | -0.524617456  | 7.6834640598 | 2.17282055706122e-05 | NA    | hypothetical protein                                                     |
| ABZ99480 | LEPBI_I3418  | -0.4331529441 | 7.0366007087 | 0.0017632099         | NA    | hypothetical protein                                                     |
| ABZ99488 | LEPBI_I3427  | -0.4299087942 | 6.9426988771 | 0.000386522          | NA    | hypothetical protein                                                     |
| ABZ99497 | LEPBI_I3436  | -0.277544803  | 8.1128771637 | 0.0063167725         | NA    | putative ferredoxin--NADP reductase                                      |
| ABZ99507 | LEPBI_I3447  | -0.3139146569 | 7.7745925292 | 0.0036305521         | NA    | hypothetical protein                                                     |
| ABZ99515 | LEPBI_I3455  | -0.4215499712 | 8.5563224672 | 0.0001181132         | NA    | putative feruloyl esterase                                               |
| ABZ99527 | LEPBI_I3468  | -0.3210827308 | 8.5530835698 | 0.0021345265         | NA    | putative hydrolase                                                       |
| ABZ99533 | LEPBI_I3474  | -0.3607212055 | 7.2141008693 | 0.0033953654         | parA  | chromosome partitioning protein ParA                                     |
| ABZ99550 | LEPBI_II0012 | 0.4339769581  | 7.9400143985 | 1.08045653502463e-06 | batA  | von Willebrand factor A                                                  |
| ABZ99560 | LEPBI_II0022 | 0.4413778314  | 6.7068700112 | 0.0057554276         | NA    | phosphotyrosine protein phosphatase                                      |
| ABZ99568 | LEPBI_II0030 | 0.3892276095  | 6.6348012584 | 0.0082860263         | NA    | cyclic nucleotide binding protein                                        |
| ABZ99572 | LEPBI_II0034 | 0.5057210684  | 6.0240678714 | 0.0008507999         | NA    | hypothetical protein                                                     |
| ABZ99573 | LEPBI_II0035 | 0.3924107099  | 8.5963102811 | 6.37753397994937e-05 | NA    | hypothetical protein                                                     |
| ABZ99603 | LEPBI_II0065 | 0.3261344766  | 8.6800882416 | 0.0090048337         | NA    | hypothetical protein                                                     |
| ABZ99613 | LEPBI_II0075 | 0.287892826   | 8.4737579511 | 0.0046659708         | traB  | Pheromone shutdown protein, TraB family                                  |
| ABZ99615 | LEPBI_II0077 | 0.7103382402  | 5.60107023   | 0.0003317945         | NA    | hypothetical protein                                                     |
| ABZ99625 | LEPBI_II0088 | 0.4407570414  | 7.0127542183 | 0.0013536718         | NA    | hypothetical protein                                                     |
| ABZ99637 | LEPBI_II0101 | 0.2926096995  | 8.1163761914 | 0.0039383443         | NA    | hypothetical protein                                                     |
| ABZ99673 | LEPBI_II0138 | 0.3367520482  | 8.2848587832 | 0.0034869109         | NA    | hypothetical protein                                                     |
| ABZ99676 | LEPBI_II0141 | -0.3570473444 | 7.4161554389 | 0.002119746          | NA    | hypothetical protein                                                     |
| ABZ99681 | LEPBI_II0146 | 0.5588470661  | 8.5248328123 | 2.44351198595913e-09 | NA    | peroxidase                                                               |
| ABZ99698 | LEPBI_II0163 | 0.4212768256  | 7.6268817081 | 0.0001042093         | NA    | DnaK suppressor; DksA/TraR zinc finger signature                         |
| ABZ99724 | LEPBI_II0191 | 0.4867766907  | 7.0065893202 | 0.0043754295         | NA    | hypothetical protein                                                     |
| ABZ99748 | LEPBI_II0215 | 0.5807646906  | 6.8462999763 | 0.0082206676         | NA    | hypothetical protein                                                     |
| ABZ99768 | LEPBI_II0235 | -0.5253194612 | 5.9250789968 | 0.000716646          | NA    | hypothetical protein                                                     |
| ABZ99773 | LEPBI_II0240 | 0.5303330161  | 5.8480491694 | 0.0027790524         | NA    | hypothetical protein                                                     |
| ABZ99815 | LEPBI_p0001  | 0.5820177283  | 7.3651490081 | 8.13564386263533e-06 | NA    | Putative chromosome partitioning protein ParA                            |
| ABZ99816 | LEPBI_p0002  | 0.7682749084  | 7.2179907489 | 1.50287060275832e-06 | NA    | Putative chromosome partitioning protein ParB                            |
| ABZ99817 | LEPBI_p0003  | 0.6748879695  | 5.2512951295 | 0.0014898741         | NA    | Putative bacteriophage protein                                           |
| ABZ99820 | LEPBI_p0006  | 0.8432546614  | 5.5779477497 | 7.21534581289544e-05 | NA    | hypothetical protein                                                     |
| ABZ99821 | LEPBI_p0007  | 0.9238064157  | 5.8743352978 | 2.41771046723606e-06 | NA    | Putative transcriptional regulator                                       |
| ABZ99822 | LEPBI_p0008  | 1.008242835   | 5.302500316  | 2.74639316105206e-08 | NA    | hypothetical protein                                                     |
| ABZ99824 | LEPBI_p0010  | 0.9068922467  | 7.7665292155 | 1.98262136460412e-10 | NA    | Putative phosphoserine phosphatase; putative membrane protein            |
| ABZ99825 | LEPBI_p0011  | 0.6369867187  | 6.830762051  | 0.0015339255         | NA    | Putative signal transduction histidine kinase; putative membrane protein |
| ABZ99826 | LEPBI_p0012  | 0.8197660629  | 6.6735418498 | 2.08240823245777e-07 | hemS  | Hemin degradation protein HemS                                           |
| ABZ99827 | LEPBI_p0013  | 1.008185783   | 7.7027560584 | 6.12689934885853e-21 | hemV  | ABC-type hemin transport system, ATPase                                  |

## BvsP\_120

|          |              |              |              |                      |      |                                                                                          |
|----------|--------------|--------------|--------------|----------------------|------|------------------------------------------------------------------------------------------|
| ABZ99828 | LEPBI_p0014  | 0.6366044815 | 6.9039504166 | 8.1741169666748e-07  | hemU | ABC-type hemin transport system, permease; putative membrane protein                     |
| ABZ99829 | LEPBI_p0015  | 0.4792258211 | 7.1398566179 | 0.0003898781         | hemT | ABC-type Fe <sup>3+</sup> -hydroxamate transport system, periplasmic component           |
| ABZ99830 | LEPBI_p0016  | 0.8101200983 | 6.2040294925 | 5.19006213628056e-08 | NA   | hypothetical protein                                                                     |
| ABZ99831 | LEPBI_pa0017 | 0.4905581995 | 5.8793469236 | 0.0042089772         | NA   | hypothetical protein                                                                     |
| ABZ99832 | LEPBI_p0018  | 0.73815268   | 8.0859708578 | 8.44458317936533e-09 | NA   | Putative TonB-dependent outer membrane receptor                                          |
| ABZ99833 | LEPBI_p0019  | 0.6420859387 | 7.9931573001 | 6.1619862074208e-06  | recD | ATP-dependent exoDNase (exonuclease V), alpha subunit, helicase superfamily I member     |
| ABZ99834 | LEPBI_p0020  | 0.6346749011 | 8.5342270881 | 1.75862071089783e-06 | recB | Exodeoxyribonuclease V beta chain, UvrD subfamily                                        |
| ABZ99835 | LEPBI_p0021  | 0.8989665509 | 8.6907703717 | 7.84411672078581e-17 | recC | Exodeoxyribonuclease V gamma chain                                                       |
| ABZ99836 | LEPBI_p0022  | 0.7128686385 | 7.7620920425 | 1.08045653502463e-06 | NA   | Putative hydrolase; putative signal peptide                                              |
| ABZ99837 | LEPBI_p0023  | 0.6242648115 | 6.8247767908 | 0.0010813264         | NA   | Putative transcription regulator; putative membrane protein                              |
| ABZ99838 | LEPBI_p0024  | 0.673743941  | 9.3917321385 | 5.27524958492304e-09 | NA   | hypothetical protein                                                                     |
| ABZ99839 | LEPBI_p0025  | 0.6656242669 | 6.1565362514 | 2.01789277718986e-05 | NA   | hypothetical protein                                                                     |
| ABZ99840 | LEPBI_pa0026 | 0.7196111825 | 7.5357822201 | 3.81825923627235e-08 | NA   | Putative antirestriction protein                                                         |
| ABZ99841 | LEPBI_p0027  | 1.0172998922 | 7.3274523354 | 3.04545470130188e-11 | NA   | Putative transposase                                                                     |
| ABZ99843 | LEPBI_p0029  | 0.9297860944 | 6.7618158201 | 1.29475564911866e-12 | NA   | Hypothetical protein; putative signal peptide                                            |
| ABZ99844 | LEPBI_p0030  | 0.8193615584 | 7.33941684   | 6.59519972216601e-07 | NA   | hypothetical protein                                                                     |
| ABZ99846 | LEPBI_p0032  | 0.9058403551 | 6.3978836137 | 5.56667529881021e-10 | NA   | hypothetical protein                                                                     |
| ABZ99847 | LEPBI_p0033  | 0.7407386963 | 9.5098120683 | 1.3074327911984e-10  | NA   | Putative protein with DEAD/DEAH box helicase and with type III restriction enzyme motif  |
| ABZ99851 | LEPBI_p0039  | 0.7096282426 | 6.7888397549 | 7.12620451991485e-07 | NA   | hypothetical protein                                                                     |
| ABZ99852 | LEPBI_p0040  | 0.9973667608 | 5.6013263532 | 1.21735438619597e-08 | NA   | hypothetical protein                                                                     |
| ABZ99853 | LEPBI_p0041  | 0.9075433537 | 7.3875574789 | 3.17106296253733e-15 | NA   | Hypothetical protein; putative signal peptide                                            |
| ABZ99855 | LEPBI_p0043  | 0.432697513  | 7.0849774376 | 0.0011926719         | NA   | ABC-type transport system, ATP binding protein                                           |
| ABZ99856 | LEPBI_p0044  | 0.6927673057 | 7.9837682777 | 1.23827372587425e-09 | NA   | ABC-type transport system, permease ; putative membrane protein; putative signal peptide |
| ABZ99857 | LEPBI_p0045  | 0.7211705802 | 7.0966919294 | 6.11042585264906e-07 | NA   | hypothetical protein                                                                     |
| ABZ99858 | LEPBI_p0046  | 0.7491447934 | 7.0790062422 | 7.08723025508587e-08 | NA   | Putative signal transduction histidine kinase; putative membrane protein                 |
| ABZ99859 | LEPBI_p0047  | 0.9115608528 | 6.735039807  | 4.36766708796601e-09 | NA   | Putative transcriptional regulator, TetR family                                          |
| ABZ99860 | LEPBI_p0048  | 0.6278702803 | 5.4939518706 | 0.0007394849         | NA   | Putative dihydrofolate reductase                                                         |
| ABZ99861 | LEPBI_p0049  | 0.7716498047 | 5.6754022688 | 2.12125592542439e-07 | NA   | hypothetical protein                                                                     |
| ABZ99862 | LEPBI_p0050  | 0.9243525657 | 5.1601873764 | 2.94414575921383e-06 | NA   | hypothetical protein                                                                     |
| ABZ99863 | LEPBI_p0051  | 0.7321871291 | 6.9466021116 | 3.61349106467902e-08 | NA   | Putative rRNA methylase                                                                  |
| ABZ99864 | LEPBI_p0052  | 0.7172206055 | 6.777167293  | 9.1793097362508e-09  | NA   | serine/threonine protein kinase                                                          |
| ABZ99865 | LEPBI_p0053  | 0.6372939363 | 7.1939608202 | 1.60756847364224e-07 | NA   | Putative GGDEF/response regulator receiver domain protein                                |
| ABZ99866 | LEPBI_p0054  | 0.4399707233 | 7.4959403628 | 0.0087002101         | NA   | Hypothetical protein; putative signal peptide                                            |
| ABZ99867 | LEPBI_p0055  | 0.6683091158 | 6.9780245685 | 8.13564386263533e-06 | NA   | hypothetical protein                                                                     |
| ABZ99868 | LEPBI_p0056  | 0.6007525895 | 7.5257751057 | 3.43353500980654e-07 | mdoD | glucan biosynthesis protein D                                                            |
| ABZ99870 | LEPBI_p0058  | 0.7413865964 | 8.1383401895 | 3.48291710684433e-09 | NA   | glucosyltransferase MdoH                                                                 |
| ABZ99871 | LEPBI_p0059  | 0.686875607  | 6.867902671  | 6.75986539572701e-05 | NA   | Putative hydrolase                                                                       |
| ABZ99872 | LEPBI_p0060  | 0.9723424946 | 6.2775212019 | 7.23485279350627e-10 | NA   | hypothetical protein                                                                     |
| ABZ99873 | LEPBI_p0061  | 0.4788228999 | 6.2229614625 | 0.0045058836         | NA   | Putative bacteriophage protein                                                           |

**Table S5 (cont.).** Differentially expressed genes in B\_120vs48.

| Gene     | Synonym      | logFC         | logCPM       | FDR                  | Symbol | Product                                                   |
|----------|--------------|---------------|--------------|----------------------|--------|-----------------------------------------------------------|
| ABZ96156 | LEPBI_I0009  | -0.6612900152 | 7.5171605832 | 1.66494800968643e-12 | NA     | putative lipoprotein                                      |
| ABZ96159 | LEPBI_I0012  | 0.3190409883  | 8.8520236062 | 0.0041583301         | NA     | hypothetical protein                                      |
| ABZ96173 | LEPBI_I0026  | 0.4119711902  | 7.4091532672 | 0.0008802342         | NA     | putative inositol monophosphatase                         |
| ABZ96182 | LEPBI_I0035  | 0.3603269509  | 9.0393467659 | 0.0002226065         | NA     | putative signal peptide                                   |
| ABZ96186 | LEPBI_I0039  | 0.3566987517  | 8.1434524694 | 0.000135919          | NA     | hypothetical protein                                      |
| ABZ96191 | LEPBI_I0044  | 0.477932868   | 7.4691987591 | 1.85588817454207e-06 | NA     | putative carboxylesterase 2                               |
| ABZ96246 | LEPBI_I0099  | 0.2795594057  | 8.6933414056 | 0.0026211731         | NA     | hypothetical protein                                      |
| ABZ96249 | LEPBI_I0102  | 0.2541710366  | 8.8243622577 | 0.0055241215         | NA     | putative oxidoreductase                                   |
| ABZ96254 | LEPBI_I0107  | 0.2802221078  | 9.4566216282 | 0.0070738372         | NA     | long-chain-fatty-acid--CoA ligase                         |
| ABZ96257 | LEPBI_I0110  | 0.4127474482  | 8.2890135629 | 0.0003965156         | NA     | hypothetical protein                                      |
| ABZ96309 | LEPBI_I0164  | -0.3939633312 | 8.7103882132 | 0.0004051183         | NA     | GDP-mannose 4,6-dehydratase                               |
| ABZ96383 | LEPBI_I0238  | -1.381858042  | 8.4718942078 | 3.95480757220242e-10 | NA     | 4-diphosphocytidyl-2-C-methyl-D-erythritol kinase         |
| ABZ96400 | LEPBI_I0255  | -0.3420110267 | 7.440287296  | 0.0023130868         | aatA   | hypothetical protein                                      |
| ABZ96412 | LEPBI_I0267  | -0.8163227986 | 9.2729552605 | 5.53908046562187e-09 | NA     | putative signal peptide                                   |
| ABZ96419 | LEPBI_I0275  | -2.1112446    | 8.7558557537 | 5.09518921179537e-06 | NA     | hypothetical protein                                      |
| ABZ96433 | LEPBI_I0289  | -2.1107444042 | 7.5568783639 | 4.91659912592585e-27 | acpP   | hypothetical protein                                      |
| ABZ96457 | LEPBI_I0313  | -0.7153417186 | 8.6493150698 | 1.26819118569222e-12 | NA     | putative signal peptide                                   |
| ABZ96461 | LEPBI_I0317  | -0.2659876069 | 8.2399381761 | 0.0032539778         | rpsA   | hypothetical protein                                      |
| ABZ96480 | LEPBI_I0337  | -0.300539212  | 8.9877394673 | 0.0012144118         | NA     | long-chain-fatty-acid--CoA ligase                         |
| ABZ96546 | LEPBI_I0404  | 0.407941258   | 8.561895118  | 0.0004009599         | IntB   | hypothetical protein                                      |
| ABZ96563 | LEPBI_I0421  | -0.7767407178 | 6.3083556045 | 4.47397018173158e-12 | NA     | hypothetical protein                                      |
| ABZ96565 | LEPBI_I0423  | -0.2902624871 | 7.3499368732 | 0.0072957525         | NA     | putative signal peptide                                   |
| ABZ96578 | LEPBI_I0439  | -0.7036358664 | 4.1900467173 | 0.0055241215         | NA     | hypothetical protein                                      |
| ABZ96579 | LEPBI_I0440  | -0.8639984292 | 3.8507075085 | 0.0072957525         | NA     | hypothetical protein                                      |
| ABZ96585 | LEPBI_I0446  | -0.4476949537 | 8.5627921642 | 0.0034801671         | NA     | rod shape-determining protein MreB                        |
| ABZ96591 | LEPBI_I0452  | -0.5812422758 | 7.6893387356 | 1.00406627150222e-05 | NA     | hypothetical protein                                      |
| ABZ96606 | LEPBI_I0468  | -0.3676301765 | 6.7299693195 | 0.0080004087         | NA     | hypothetical protein                                      |
| ABZ96618 | LEPBI_I0480  | -0.3026497051 | 8.4191667254 | 0.0022342354         | NA     | mannose-1-phosphate guanylyltransferase                   |
| ABZ96653 | LEPBI_I0515  | -0.4725123471 | 7.635377771  | 0.0012597478         | NA     | 30S ribosomal protein S20                                 |
| ABZ96689 | LEPBI_I0551  | -0.2789781423 | 8.5705875405 | 0.0035672895         | NA     | putative signal peptide                                   |
| ABZ96736 | LEPBI_I0599  | -0.3996052795 | 8.7046497661 | 0.0047934142         | NA     | 3-hydroxyacyl-CoA dehydrogenase                           |
| ABZ96800 | LEPBI_I0667  | -0.9990387634 | 6.0998438356 | 7.15182344702655e-11 | nirD   | putative signal peptide                                   |
| ABZ96802 | LEPBI_I0669  | -0.3621915136 | 7.5789632707 | 0.0006229971         | NA     | heme oxygenase                                            |
| ABZ96814 | LEPBI_I0682  | -0.3816561505 | 6.1965768182 | 0.0013790713         | NA     | hypothetical protein                                      |
| ABZ96815 | LEPBI_I0683  | -0.6511386438 | 7.9980262479 | 1.07918517872556e-11 | NA     | putative lipoprotein                                      |
| ABZ96828 | LEPBI_I0696  | -0.3076354376 | 8.240027159  | 0.006065494          | NA     | DegT/DnrJ/EryC1/StrS family aminotransferase              |
| ABZ96878 | LEPBI_I0746  | 0.3065078374  | 7.3347739227 | 0.0043577495         | rhIE   | hypothetical protein                                      |
| ABZ96907 | LEPBI_I0777  | -0.5028723856 | 7.6419021    | 0.0001009693         | NA     | putative triglyceride lipase                              |
| ABZ96930 | LEPBI_I0802  | -0.3553172689 | 7.8346278004 | 0.0029045149         | NA     | ATP synthase F0 subunit C                                 |
| ABZ96931 | LEPBI_I0803  | -0.5060014799 | 7.7456518602 | 3.87862380326242e-07 | NA     | F0F1 ATP synthase subunit B                               |
| ABZ96935 | LEPBI_I0807  | -0.2643123177 | 8.7187025318 | 0.009002364          | NA     | F0F1 ATP synthase subunit beta                            |
| ABZ96945 | LEPBI_Ia0817 | -0.81492372   | 8.9245698738 | 2.06388602401253e-23 | NA     | outer membrane protein                                    |
| ABZ96985 | LEPBI_I0858  | -0.9148420442 | 8.5411101175 | 4.36593605728824e-05 | ptsN   | hypothetical protein                                      |
| ABZ96986 | LEPBI_I0859  | -1.0229265198 | 8.5895762377 | 1.59442180476944e-22 | NA     | hypothetical protein                                      |
| ABZ96987 | LEPBI_I0860  | -0.572231438  | 8.267598476  | 1.88758026026515e-09 | NA     | hypothetical protein                                      |
| ABZ97030 | LEPBI_I0905  | -0.7044292908 | 6.8601264464 | 3.95480757220242e-10 | NA     | putative anti-sigma factor antagonist                     |
| ABZ97041 | LEPBI_I0917  | -0.4546353173 | 6.2952693548 | 0.0002054767         | NA     | chemotactic two-component response regulator protein CheY |
| ABZ97056 | LEPBI_I0932  | 0.50003982    | 7.1269448598 | 0.0053668624         | NA     | putative signal peptide                                   |
| ABZ97070 | LEPBI_I0946  | -0.3766196655 | 7.9648828691 | 0.0002272597         | acdA4  | RNA polymerase sigma factor WhiG                          |
| ABZ97081 | LEPBI_I0957  | -1.1350787304 | 9.281950417  | 4.1297582606442e-07  | icd    | hypothetical protein                                      |

## B\_120vs48

|          |             |               |              |                      |       |                                                                    |
|----------|-------------|---------------|--------------|----------------------|-------|--------------------------------------------------------------------|
| ABZ97143 | LEPBI_11020 | -0.7637859378 | 5.9886276183 | 3.14039780699028e-07 | NA    | 50S ribosomal protein L28                                          |
| ABZ97157 | LEPBI_11034 | -0.2948313876 | 7.5893219551 | 0.0081895828         | norB  | hypothetical protein                                               |
| ABZ97159 | LEPBI_11036 | -0.6910850683 | 5.4535860263 | 3.78415318597904e-06 | NA    | putative anti-sigma factor antagonist                              |
| ABZ97192 | LEPBI_11069 | 0.3632527061  | 8.3096426587 | 2.68505531370092e-05 | NA    | putative two-component response regulator                          |
| ABZ97198 | LEPBI_11075 | 0.2323856427  | 8.2093778511 | 0.0093966188         | NA    | putative methyl-accepting chemotaxis protein                       |
| ABZ97199 | LEPBI_11078 | 0.3627172537  | 7.6273280551 | 0.0030522487         | mreC  | putative two-component hybrid sensor and regulator                 |
| ABZ97201 | LEPBI_11080 | 0.247722578   | 8.205252581  | 0.0097511263         | NA    | putative adenylate cyclase                                         |
| ABZ97202 | LEPBI_11081 | 0.4630687273  | 7.5242872954 | 2.48416520604931e-06 | NA    | hypothetical protein                                               |
| ABZ97205 | LEPBI_11084 | 0.2704646351  | 8.329559309  | 0.0023971998         | slyD  | hypothetical protein                                               |
| ABZ97211 | LEPBI_11090 | 0.2790199421  | 8.1277518762 | 0.0088908745         | rbpA3 | hypothetical protein                                               |
| ABZ97250 | LEPBI_11132 | -0.473081949  | 7.175594265  | 4.1270375677487e-06  | NA    | electron transfer flavoprotein subunit alpha                       |
| ABZ97251 | LEPBI_11133 | -0.362561572  | 7.6392210962 | 0.0067801338         | NA    | electron transfer flavoprotein subunit beta                        |
| ABZ97259 | LEPBI_11142 | -0.4673235429 | 6.2273039611 | 0.0040674019         | NA    | hypothetical protein                                               |
| ABZ97276 | LEPBI_11160 | -0.3944660562 | 7.0716500746 | 0.0005240865         | NA    | hypothetical protein                                               |
| ABZ97291 | LEPBI_11175 | -2.0644022767 | 9.6792875369 | 6.71391255490524e-18 | NA    | hypothetical protein                                               |
| ABZ97313 | LEPBI_11197 | -0.5606148232 | 6.483242449  | 2.36059999257151e-05 | NA    | putative anti-sigma factor antagonist                              |
| ABZ97316 | LEPBI_11200 | 0.3390675546  | 7.9699373943 | 0.0015594684         | NA    | putative signal transduction histidine kinase                      |
| ABZ97318 | LEPBI_11204 | 0.3629484506  | 6.7506914094 | 0.0034801671         | NA    | hypothetical protein                                               |
| ABZ97319 | LEPBI_11205 | 0.5389002904  | 6.4186494239 | 0.0005185164         | NA    | putative integrase/recombinase                                     |
| ABZ97321 | LEPBI_11207 | 0.4108965652  | 7.8390446574 | 0.0001301509         | NA    | parallel beta-helix repeat-containing electron transport protein   |
| ABZ97340 | LEPBI_11226 | 0.4429697277  | 6.3120906877 | 0.0038505823         | dnaX2 | hypothetical protein                                               |
| ABZ97437 | LEPBI_11327 | -0.8641313111 | 6.7889999511 | 1.31721538280066e-14 | NA    | hypothetical protein                                               |
| ABZ97468 | LEPBI_11358 | -0.4319020944 | 7.691889098  | 0.0006625938         | NA    | alkyl hydroperoxide reductase subunit C                            |
| ABZ97477 | LEPBI_11368 | -0.3512059519 | 7.2820459311 | 0.0006005628         | batD  | putative cytochrome c3                                             |
| ABZ97483 | LEPBI_11374 | -0.4282301675 | 7.1912266909 | 0.0026440562         | NA    | putative signal peptide                                            |
| ABZ97495 | LEPBI_11386 | -0.2654015731 | 8.6625051522 | 0.0074516589         | NA    | Poly(A) polymerase                                                 |
| ABZ97497 | LEPBI_11388 | -0.4587180377 | 7.5491950141 | 1.88224600007802e-05 | NA    | 50S ribosomal protein L13                                          |
| ABZ97537 | LEPBI_11429 | 0.2660604197  | 7.9317130167 | 0.0074555604         | NA    | hypothetical protein                                               |
| ABZ97567 | LEPBI_11460 | -0.8267986644 | 8.4802439142 | 1.59976781826278e-16 | glpD  | hypothetical protein                                               |
| ABZ97630 | LEPBI_11523 | -0.7060513478 | 6.8410351384 | 1.97619033093919e-05 | NA    | hypothetical protein                                               |
| ABZ97632 | LEPBI_11525 | -0.2914881124 | 8.8261726893 | 0.0069840095         | NA    | translation initiation factor IF-2                                 |
| ABZ97635 | LEPBI_11528 | -0.4138941075 | 6.7617326078 | 0.0096253755         | NA    | 30S ribosomal protein S15                                          |
| ABZ97636 | LEPBI_11529 | -0.3562845827 | 8.6444776899 | 3.20472986407974e-05 | NA    | polynucleotide phosphorylase/polyadenylase                         |
| ABZ97654 | LEPBI_11547 | 0.288024697   | 8.2218400671 | 0.0066671972         | NA    | putative short-chain dehydrogenase/reductase SDR                   |
| ABZ97660 | LEPBI_11553 | -0.876715188  | 7.5904339659 | 8.48666134684224e-11 | pyrF  | hypothetical protein                                               |
| ABZ97661 | LEPBI_11554 | 0.3617925581  | 7.4941545673 | 0.0041310297         | cfa   | CDP-diacylglycerol--glycerol-3-phosphate 3-phosphatidyltransferase |
| ABZ97668 | LEPBI_11561 | -1.5807666823 | 6.2211385294 | 1.83900705002891e-09 | htrA1 | hypothetical protein                                               |
| ABZ97671 | LEPBI_11564 | -0.9307522566 | 6.2415586079 | 0.0007370681         | NA    | 30S ribosomal protein S21                                          |
| ABZ97681 | LEPBI_11574 | -0.5330409481 | 6.3430604353 | 2.68874737693891e-05 | NA    | hypothetical protein                                               |
| ABZ97696 | LEPBI_11589 | -1.8846899859 | 8.4983223575 | 6.24735399772845e-59 | NA    | flagellar filament core protein FlaB                               |
| ABZ97704 | LEPBI_11597 | -0.5583394004 | 8.110539693  | 7.23498199019086e-07 | NA    | putative signal peptide                                            |
| ABZ97767 | LEPBI_11660 | -0.5583526849 | 5.13305053   | 0.0032186098         | NA    | 30S ribosomal protein S16                                          |
| ABZ97791 | LEPBI_11684 | 0.4171045032  | 6.7743214829 | 0.0004485117         | NA    | hypothetical protein                                               |
| ABZ97812 | LEPBI_11706 | -0.3954946786 | 7.2063703734 | 0.0003575689         | argB  | ATP-dependent Clp protease proteolytic subunit                     |
| ABZ97822 | LEPBI_11716 | -0.5952828426 | 7.0132458599 | 1.69653070521406e-07 | NA    | putative transcriptional regulator                                 |
| ABZ97847 | LEPBI_11741 | -0.891119317  | 6.7762049247 | 7.76268034852977e-16 | NA    | putative anti-sigma factor antagonist                              |
| ABZ97855 | LEPBI_11749 | 0.4838614487  | 7.9980804465 | 0.0002054767         | NA    | hypothetical protein                                               |
| ABZ97861 | LEPBI_11755 | 0.3162558866  | 7.9819430619 | 0.0042971334         | NA    | phosphoribosylaminoimidazole carboxylase ATPase subunit            |
| ABZ97871 | LEPBI_11765 | 0.2946413587  | 7.4026839301 | 0.0043279602         | NA    | hypothetical protein                                               |
| ABZ97879 | LEPBI_11773 | -0.573901939  | 6.4431406362 | 1.21595748665141e-05 | NA    | 50S ribosomal protein L21                                          |
| ABZ97881 | LEPBI_11775 | -0.6972470104 | 5.5761902923 | 6.20324896603489e-06 | NA    | 50S ribosomal protein L27                                          |
| ABZ97891 | LEPBI_11785 | 0.4136729593  | 7.6229822779 | 0.0006925418         | NA    | putative N-acyl-L-amino acid amidohydrolase, M20D peptidase        |
| ABZ97902 | LEPBI_11796 | 0.3278697452  | 7.9049568417 | 0.0015701672         | NA    | putative D-alanine--d-alanine ligase                               |



## B\_120vs48

|          |             |               |              |                      |       |                                                 |
|----------|-------------|---------------|--------------|----------------------|-------|-------------------------------------------------|
| ABZ97903 | LEPBI_11797 | 0.3270324048  | 8.0373298555 | 0.0040913783         | NA    | L-lysine 2,3-aminomutase                        |
| ABZ97911 | LEPBI_11805 | 0.2881271395  | 8.2693992148 | 0.0023452088         | NA    | hypothetical protein                            |
| ABZ97928 | LEPBI_11822 | -0.3906039972 | 7.2725099307 | 0.0011061497         | NA    | hypothetical protein                            |
| ABZ97977 | LEPBI_11873 | -0.3842990433 | 7.4199539177 | 0.0006625938         | algI  | OmpA domain-containing protein                  |
| ABZ97979 | LEPBI_11875 | 0.3099016837  | 9.0327880324 | 0.0025076848         | NA    | putative cyclic-nucleotide-gated cation channel |
| ABZ97987 | LEPBI_11883 | -0.4405957261 | 9.1583260814 | 2.17560511310176e-05 | NA    | Iron(III) dicitrate TonB-dependent receptor     |
| ABZ98041 | LEPBI_11938 | -0.3992931823 | 8.020023751  | 0.0083942911         | NA    | 50S ribosomal protein L17                       |
| ABZ98042 | LEPBI_11939 | -0.531472313  | 7.6291786255 | 3.25439530546909e-06 | NA    | DNA-directed RNA polymerase subunit alpha       |
| ABZ98043 | LEPBI_11940 | -0.8006152855 | 6.8695709785 | 1.85732696100216e-11 | NA    | 30S ribosomal protein S4                        |
| ABZ98044 | LEPBI_11941 | -0.740159642  | 6.0284836945 | 6.64916919170731e-06 | NA    | 30S ribosomal protein S11                       |
| ABZ98045 | LEPBI_11942 | -0.9014928617 | 7.2382197288 | 8.41170782315474e-08 | hemV  | 30S ribosomal protein S13                       |
| ABZ98047 | LEPBI_11944 | -1.0289471453 | 7.582434287  | 5.31317090133357e-09 | hemU  | adenylate kinase                                |
| ABZ98049 | LEPBI_11946 | -0.3010378157 | 7.5663647491 | 0.0042243594         | hemT  | 50S ribosomal protein L15                       |
| ABZ98050 | LEPBI_11947 | -0.433194137  | 6.7507264781 | 0.0099448054         | NA    | 50S ribosomal protein L30                       |
| ABZ98052 | LEPBI_11949 | -0.4904788189 | 6.9013316787 | 3.20472986407974e-05 | NA    | 50S ribosomal protein L18                       |
| ABZ98053 | LEPBI_11950 | -0.3694822207 | 7.9281292974 | 0.0028968931         | recD  | 50S ribosomal protein L6                        |
| ABZ98054 | LEPBI_11951 | -0.3892808556 | 7.8034519721 | 0.0002238489         | recB  | 30S ribosomal protein S8                        |
| ABZ98057 | LEPBI_11954 | -0.4963693617 | 5.9771792268 | 0.0011157196         | recC  | 50S ribosomal protein L14                       |
| ABZ98058 | LEPBI_11955 | -0.7702669001 | 5.6680117723 | 4.02292462791895e-07 | NA    | 30S ribosomal protein S17                       |
| ABZ98059 | LEPBI_11956 | -1.0677680143 | 5.7111419031 | 4.56455192539989e-06 | NA    | 50S ribosomal protein L29                       |
| ABZ98062 | LEPBI_11959 | -0.6941966347 | 5.3569232051 | 0.0048354439         | NA    | 50S ribosomal protein L22                       |
| ABZ98063 | LEPBI_11960 | -0.4737420207 | 6.3076127659 | 0.0007894997         | NA    | 30S ribosomal protein S19                       |
| ABZ98069 | LEPBI_11966 | -0.5912790493 | 9.1924111814 | 3.84359499034162e-06 | NA    | elongation factor Tu                            |
| ABZ98071 | LEPBI_11968 | -0.5845482687 | 7.8629596368 | 3.44486726644269e-06 | NA    | 30S ribosomal protein S7                        |
| ABZ98072 | LEPBI_11969 | -0.5329203238 | 8.4920131929 | 5.30900847369325e-09 | NA    | 30S ribosomal protein S12                       |
| ABZ98074 | LEPBI_11972 | -0.286042781  | 9.6775020841 | 0.0074555604         | NA    | DNA-directed RNA polymerase subunit beta        |
| ABZ98075 | LEPBI_11973 | -0.833542611  | 7.1433181785 | 2.96433609890579e-07 | NA    | 50S ribosomal protein L7/L12                    |
| ABZ98077 | LEPBI_11975 | -0.386943875  | 6.9741037207 | 0.0055118819         | NA    | 50S ribosomal protein L1                        |
| ABZ98078 | LEPBI_11976 | -0.6775716527 | 6.9254905332 | 1.62843732547982e-09 | NA    | 50S ribosomal protein L11                       |
| ABZ98081 | LEPBI_11979 | -0.3001874796 | 6.8982566664 | 0.0082247414         | NA    | hypothetical protein                            |
| ABZ98158 | LEPBI_12056 | -0.3038780622 | 7.6924002243 | 0.0047607092         | NA    | succinyl-CoA synthetase subunit beta            |
| ABZ98159 | LEPBI_12057 | -0.2667207582 | 7.7591965031 | 0.0080004087         | NA    | succinyl-CoA synthetase subunit alpha           |
| ABZ98182 | LEPBI_12080 | -0.3158247999 | 7.4812934163 | 0.0023452088         | NA    | glyceraldehyde-3-phosphate dehydrogenase        |
| ABZ98200 | LEPBI_12098 | -0.4920489317 | 5.8901718969 | 0.0015337013         | NA    | 30S ribosomal protein S18                       |
| ABZ98215 | LEPBI_12113 | 0.4269211511  | 6.8529182262 | 0.0024048226         | NA    | putative RNA pseudouridine synthase             |
| ABZ98229 | LEPBI_12127 | 0.2957066097  | 7.8895959439 | 0.0017912994         | NA    | hypothetical protein                            |
| ABZ98234 | LEPBI_12132 | -1.112099975  | 8.0151454016 | 1.08617546087052e-19 | NA    | flagellar filament 35 kDa core protein          |
| ABZ98235 | LEPBI_12133 | -0.811405758  | 8.7972458296 | 2.72611633780737e-17 | NA    | flagellar filament 35 kDa core protein          |
| ABZ98244 | LEPBI_12142 | -0.3722476723 | 6.4495340853 | 0.0037510156         | NA    | SET domain-containing protein                   |
| ABZ98245 | LEPBI_12143 | -0.6290320482 | 6.1255715526 | 1.30837034177873e-06 | NA    | hypothetical protein                            |
| ABZ98248 | LEPBI_12146 | -0.7257356624 | 7.0288711353 | 6.86357336511931e-06 | NA    | putative sigma-54 modulation protein            |
| ABZ98278 | LEPBI_12179 | -0.4755475355 | 6.1121609277 | 0.002451789          | NA    | hypothetical protein                            |
| ABZ98280 | LEPBI_12181 | -0.3888848578 | 5.9478068276 | 0.0057495325         | NA    | hypothetical protein                            |
| ABZ98291 | LEPBI_12192 | -0.4630600309 | 6.0031216541 | 0.0012102762         | NA    | hypothetical protein                            |
| ABZ98324 | LEPBI_12227 | -0.4731668796 | 5.3580654432 | 0.0092371269         | NA    | hypothetical protein                            |
| ABZ98345 | LEPBI_12249 | -1.0991822171 | 4.5203356447 | 2.29476011586199e-09 | NA    | putative virulence-associated protein B         |
| ABZ98346 | LEPBI_12250 | -0.559997825  | 4.4728321505 | 0.0078303165         | mdoD  | PilT protein                                    |
| ABZ98395 | LEPBI_12300 | -0.5536616423 | 7.289483981  | 5.17376449119446e-07 | NA    | thioredoxin                                     |
| ABZ98407 | LEPBI_12312 | -0.3621983814 | 7.3505483519 | 0.001529118          | NA    | hypothetical protein                            |
| ABZ98413 | LEPBI_12318 | -0.7995067916 | 4.7075676831 | 3.58997523828429e-05 | NA    | putative two-component response regulator       |
| ABZ98420 | LEPBI_12327 | -0.4912650606 | 8.6892593631 | 5.63415954513082e-08 | NA    | putative ATPase                                 |
| ABZ98421 | LEPBI_12328 | -0.7392998106 | 8.0021304043 | 2.98439452066314e-11 | NA    | putative anti-sigma factor antagonist           |
| ABZ98427 | LEPBI_12335 | -0.4329052301 | 7.4555872494 | 1.97619033093919e-05 | flaA1 | flagellar filament outer layer protein A        |



## B\_120vs48

|          |             |               |              |                      |       |                                             |
|----------|-------------|---------------|--------------|----------------------|-------|---------------------------------------------|
| ABZ98428 | LEPBI_I2336 | -0.5060569234 | 8.2340581999 | 3.73300983797586e-06 | flaA2 | flagellar filament outer layer protein      |
| ABZ98429 | LEPBI_I2337 | -1.0376088409 | 6.9587776068 | 6.71391255490524e-18 |       | 0 hypothetical protein                      |
| ABZ98443 | LEPBI_I2352 | -0.3475481909 | 7.2196025597 | 0.000921407          |       | 0 hypothetical protein                      |
| ABZ98474 | LEPBI_I2384 | -0.3700477177 | 7.5269025376 | 0.0011061497         |       | 0 hypothetical protein                      |
| ABZ98487 | LEPBI_I2397 | -1.1140663516 | 4.927678441  | 2.00246336119162e-10 |       | 0 hypothetical protein                      |
| ABZ98489 | LEPBI_I2399 | -0.678438591  | 5.5448259099 | 0.0004967178         | rpmI  | 50S ribosomal protein L35                   |
| ABZ98490 | LEPBI_I2400 | -0.5554006046 | 8.3213669627 | 0.00112598           | infC  | translation initiation factor IF-3          |
| ABZ98519 | LEPBI_I2430 | -0.3742000085 | 8.0574276377 | 0.0004832863         |       | 0 di-heme cytochrome C peroxidase           |
| ABZ98524 | LEPBI_I2435 | -0.3557064375 | 8.0091960566 | 3.0755378280586e-05  |       | 0 putative malate synthase-like protein     |
| ABZ98551 | LEPBI_I2462 | -0.5384648737 | 5.6350417864 | 0.0003155003         |       | 0 putative signal peptide                   |
| ABZ98603 | LEPBI_I2518 | -0.4394300898 | 7.5926052631 | 0.0002051016         |       | 0 hypothetical protein                      |
| ABZ98604 | LEPBI_I2520 | 0.3090430846  | 9.1954357002 | 0.0026211731         |       | 0 putative cAMP-dependent protein kinase    |
| ABZ98605 | LEPBI_I2521 | 0.422194278   | 8.6166309669 | 0.000266701          |       | 0 putative phospholipase                    |
| ABZ98607 | LEPBI_I2523 | 0.5465300829  | 7.6675402688 | 5.63415954513082e-08 |       | 0 hypothetical protein                      |
| ABZ98608 | LEPBI_I2524 | 0.5506121812  | 6.198086361  | 0.0002357489         |       | 0 hypothetical protein                      |
| ABZ98609 | LEPBI_I2525 | 0.4102630093  | 9.7055523007 | 3.44486726644269e-06 |       | 0 putative adenylate cyclase                |
| ABZ98610 | LEPBI_I2526 | 0.6656262495  | 7.0942151349 | 6.80563584498791e-06 |       | 0 putative two-component response regulator |
| ABZ98611 | LEPBI_I2527 | 0.5939038775  | 7.2658920621 | 2.88451892694582e-06 |       | 0 hypothetical protein                      |
| ABZ98613 | LEPBI_I2529 | 0.5331452303  | 6.8129801391 | 0.003642449          |       | 0 hypothetical protein                      |
| ABZ98615 | LEPBI_I2531 | 0.4045546221  | 6.71072081   | 0.0023964165         |       | 0 hypothetical protein                      |
| ABZ98617 | LEPBI_I2536 | 0.3507379508  | 7.1758585521 | 0.0025075664         |       | 0 putative signal peptide                   |
| ABZ98618 | LEPBI_I2537 | 0.4194708407  | 8.1946182144 | 6.64826703554731e-06 |       | 0 hypothetical protein                      |
| ABZ98619 | LEPBI_I2538 | 0.4421412972  | 7.1152351795 | 0.0007370681         |       | 0 alpha/beta family hydrolase               |
| ABZ98622 | LEPBI_I2541 | 0.5069514821  | 7.0526330308 | 0.0002054767         |       | 0 putative esterase/lipase                  |
| ABZ98624 | LEPBI_I2543 | 0.2686886272  | 7.9441721937 | 0.0099448054         | aatA  | aspartate aminotransferase A                |
| ABZ98625 | LEPBI_I2544 | 0.3263340895  | 9.2133021353 | 0.0003360798         |       | 0 putative DNA repair helicase              |
| ABZ98642 | LEPBI_I2561 | 0.4870965469  | 8.6356501772 | 0.0011131725         |       | 0 hypothetical protein                      |
| ABZ98666 | LEPBI_I2585 | -0.9376721758 | 6.1305232359 | 0.002451789          | acpP  | acyl carrier protein                        |
| ABZ98673 | LEPBI_I2594 | -0.4475245075 | 7.098391653  | 3.39814306458814e-05 |       | 0 hypothetical protein                      |
| ABZ98674 | LEPBI_I2595 | -0.3583499405 | 8.7488277069 | 3.03837085924976e-05 | rpsA  | 30S ribosomal protein S1                    |
| ABZ98748 | LEPBI_I2670 | -0.9468607727 | 8.0733538377 | 4.20051635336817e-17 |       | 0 putative signal peptide                   |
| ABZ98752 | LEPBI_I2674 | -0.5260805198 | 8.153967187  | 8.12630720705156e-08 | IntB  | apolipoprotein N-acyltransferase            |
| ABZ98754 | LEPBI_I2676 | -1.1212551061 | 8.6629562717 | 3.68374385101756e-26 |       | 0 CarD family transcriptional regulator     |
| ABZ98772 | LEPBI_I2694 | -0.4738713343 | 7.6070395397 | 2.68874737693891e-05 |       | 0 putative cytochrome c                     |
| ABZ98776 | LEPBI_I2698 | 0.3649529065  | 6.7307007754 | 0.0018198154         |       | 0 hypothetical protein                      |
| ABZ98783 | LEPBI_I2705 | -0.6718375013 | 7.3673715019 | 6.17298361804489e-10 |       | 0 hypothetical protein                      |
| ABZ98788 | LEPBI_I2710 | -0.948169841  | 4.0922227985 | 0.0017207284         |       | 0 hypothetical protein                      |
| ABZ98790 | LEPBI_I2712 | -1.3983151396 | 4.3194947743 | 2.90106713371941e-12 |       | 0 hypothetical protein                      |
| ABZ98804 | LEPBI_I2726 | -0.3884349884 | 7.8695769031 | 4.46005392214808e-05 |       | 0 hypothetical protein                      |
| ABZ98815 | LEPBI_I2737 | 0.3861964091  | 7.5551379856 | 0.0005456934         |       | 0 AraC family transcriptional regulator     |
| ABZ98821 | LEPBI_I2743 | 0.2599206396  | 9.242422636  | 0.0087573309         |       | 0 hypothetical protein                      |
| ABZ98838 | LEPBI_I2760 | -0.3005250796 | 9.2277980906 | 0.0012597478         |       | 0 putative TonB-dependent receptor protein  |
| ABZ98839 | LEPBI_I2761 | -0.4415035116 | 6.307398388  | 0.0002447357         |       | 0 putative signal peptide                   |
| ABZ98844 | LEPBI_I2767 | 0.4425831295  | 6.4506955641 | 0.0003871886         | nirD  | nitrite reductase small subunit             |
| ABZ98882 | LEPBI_I2805 | 0.3622426739  | 7.216960189  | 0.0005240865         |       | 0 putative transcriptional regulator        |
| ABZ98895 | LEPBI_I2820 | 0.343648487   | 7.4968734428 | 0.0027443475         |       | 0 hypothetical protein                      |
| ABZ98899 | LEPBI_I2824 | 0.4328302123  | 7.6481155893 | 1.55214998443609e-06 |       | 0 hypothetical protein                      |
| ABZ98900 | LEPBI_I2825 | 0.486824352   | 8.4659944067 | 5.13607470894924e-08 |       | 0 hypothetical protein                      |
| ABZ98901 | LEPBI_I2827 | 0.4639412781  | 8.3177689168 | 5.5458120398082e-06  | rhIE  | ATP-dependent RNA helicase RhIE             |
| ABZ98902 | LEPBI_I2828 | 0.7700091748  | 6.0913107468 | 1.62707477746209e-08 |       | 0 hypothetical protein                      |
| ABZ98903 | LEPBI_I2830 | 0.8833101354  | 5.62810546   | 1.32304396351803e-08 |       | 0 hypothetical protein                      |
| ABZ98905 | LEPBI_I2834 | 0.8773318951  | 7.7202881334 | 6.86357336511931e-06 |       | 0 hypothetical protein                      |
| ABZ98907 | LEPBI_I2836 | 0.3330664139  | 7.8761247775 | 0.0029779045         |       | 0 ABC transporter inner membrane protein    |

## B\_120vs48

|          |              |               |               |                      |       |                                                       |
|----------|--------------|---------------|---------------|----------------------|-------|-------------------------------------------------------|
| ABZ98908 | LEPBI_I2837  | 0.3280292224  | 8.2736938297  | 0.0001922253         | 0     | ABC transporter inner membrane protein                |
| ABZ98909 | LEPBI_I2838  | 0.4007196232  | 6.5804017383  | 0.0013639668         | ptsN  | PTS system transporter subunit IIA                    |
| ABZ98912 | LEPBI_I2841  | -0.9296696705 | 5.3527854204  | 2.00881706859064e-10 | 0     | hypothetical protein                                  |
| ABZ98931 | LEPBI_I2862  | -0.5264111618 | 10.0298131004 | 0.0011131725         | 0     | hypothetical protein                                  |
| ABZ98933 | LEPBI_I2864  | -0.8803892261 | 8.4763324115  | 2.54698878359593e-18 | 0     | hypothetical protein                                  |
| ABZ98944 | LEPBI_I2875  | -0.2465199435 | 8.2827508129  | 0.0049948556         | 0     | putative NADH oxidoreductase                          |
| ABZ98945 | LEPBI_I2876  | -0.3840708812 | 7.5350746458  | 0.0012102762         | 0     | hypothetical protein                                  |
| ABZ98949 | LEPBI_I2880  | -0.3348701367 | 8.8395303818  | 0.0001487297         | acdA4 | acyl-CoA dehydrogenase                                |
| ABZ98960 | LEPBI_I2891  | -0.2590373151 | 8.84874063    | 0.0050938015         | icd   | isocitrate dehydrogenase                              |
| ABZ99004 | LEPBI_I2935  | 0.2873998817  | 8.9862083644  | 0.0055891675         | 0     | hypothetical protein                                  |
| ABZ99022 | LEPBI_I2954  | -0.2746194326 | 8.4602040512  | 0.0078056488         | norB  | nitric-oxide reductase subunit B                      |
| ABZ99041 | LEPBI_I2973  | -0.4078446444 | 7.3490824183  | 0.0002447357         | 0     | putative signal peptide                               |
| ABZ99045 | LEPBI_I2977  | -0.3435172833 | 7.1455181008  | 0.0087458232         | 0     | putative two-component response regulator             |
| ABZ99052 | LEPBI_I2984  | -0.2663619836 | 8.0645981035  | 0.0078653978         | 0     | hypothetical protein                                  |
| ABZ99139 | LEPBI_I3073  | -0.3054235058 | 8.1359935871  | 0.0032186098         | mreC  | rod shape-determining protein MreC                    |
| ABZ99146 | LEPBI_I3080  | -0.3246794231 | 6.9508866925  | 0.0090082021         | 0     | putative anti-sigma factor antagonist                 |
| ABZ99147 | LEPBI_I3081  | -0.397720244  | 8.2552117214  | 1.1348815648535e-06  | 0     | putative signal peptide                               |
| ABZ99192 | LEPBI_I3126  | -0.607126036  | 7.5643481771  | 8.67233037454515e-10 | slyD  | FKBP-type peptidyl-prolyl cis-trans isomerase SlyD    |
| ABZ99193 | LEPBI_I3127  | -0.4311290045 | 7.3058244236  | 0.0047607092         | rbpA3 | RNA-binding protein                                   |
| ABZ99214 | LEPBI_I3149  | -0.4061465295 | 8.1465944668  | 0.0007651594         | 0     | hypothetical protein                                  |
| ABZ99230 | LEPBI_I3165  | -0.2970392876 | 7.6838012865  | 0.0072367826         | 0     | hypothetical protein                                  |
| ABZ99251 | LEPBI_I3186  | -2.8257091342 | 8.321380916   | 3.73524982166904e-34 | 0     | hypothetical protein                                  |
| ABZ99279 | LEPBI_I3214  | -0.345335809  | 6.9369289273  | 0.001529118          | 0     | hypothetical protein                                  |
| ABZ99300 | LEPBI_I3235  | 0.2780369537  | 7.7072519512  | 0.0092031851         | 0     | putative membrane-associated phospholipid phosphatase |
| ABZ99310 | LEPBI_I3245  | -0.3654483267 | 8.3103333975  | 1.21595748665141e-05 | 0     | putative signal peptide                               |
| ABZ99432 | LEPBI_I3368  | 0.4831134596  | 7.1475286481  | 2.61309270658375e-05 | 0     | ArsC family arsenate permease                         |
| ABZ99491 | LEPBI_I3430  | -0.3936600027 | 7.5783107977  | 0.0013657833         | 0     | hypothetical protein                                  |
| ABZ99513 | LEPBI_I3453  | -0.3882225957 | 6.8140996211  | 0.0029595045         | 0     | hypothetical protein                                  |
| ABZ99514 | LEPBI_I3454  | 0.4553747925  | 6.5957530391  | 0.0007945307         | 0     | hypothetical protein                                  |
| ABZ99538 | LEPBI_I3479  | 0.3475720093  | 7.5343536677  | 0.008294762          | dnaX2 | DNA polymerase III subunit gamma/tau                  |
| ABZ99544 | LEPBI_II0006 | 0.3385488391  | 6.9121799072  | 0.0074201949         | 0     | hypothetical protein                                  |
| ABZ99546 | LEPBI_II0008 | 0.3075280025  | 8.846672758   | 0.0008772245         | 0     | Histidine kinase sensor protein                       |
| ABZ99548 | LEPBI_II0010 | 0.2822192678  | 8.4349104784  | 0.0080322873         | batD  | von Willebrand factor A                               |
| ABZ99552 | LEPBI_II0014 | 0.3665982587  | 7.2958062658  | 0.0005289492         | 0     | hypothetical protein                                  |
| ABZ99561 | LEPBI_II0023 | 0.3123913486  | 7.5033779598  | 0.0030244144         | 0     | hypothetical protein                                  |
| ABZ99572 | LEPBI_II0034 | 0.8572122815  | 6.0240678714  | 5.02034019900044e-11 | 0     | hypothetical protein                                  |
| ABZ99574 | LEPBI_II0036 | -0.7143154861 | 6.6179608391  | 0.0013790713         | 0     | DNA-binding protein (HU-like protein)                 |
| ABZ99579 | LEPBI_II0041 | 0.2534885741  | 8.5020577941  | 0.0098080302         | glpD  | glycerol-3-phosphate oxidase                          |
| ABZ99599 | LEPBI_II0061 | -0.3423908056 | 6.9737258184  | 0.002090864          | 0     | cytochrome c oxidase, subunit III                     |
| ABZ99608 | LEPBI_II0070 | 0.5849835751  | 6.0551327974  | 0.0005240865         | 0     | hypothetical protein                                  |
| ABZ99623 | LEPBI_II0085 | 0.3381127239  | 8.7527155181  | 9.33922136517404e-05 | 0     | hypothetical protein                                  |
| ABZ99636 | LEPBI_II0100 | 0.2652857445  | 7.9607930649  | 0.0066671972         | 0     | hypothetical protein                                  |
| ABZ99637 | LEPBI_II0101 | 0.3781781732  | 8.1163761914  | 2.70825014744589e-05 | 0     | hypothetical protein                                  |
| ABZ99646 | LEPBI_II0110 | 0.3823251616  | 8.1725594262  | 1.452091580803e-05   | pyrF  | Orotidine-5'-monophosphate decarboxylase              |
| ABZ99649 | LEPBI_II0113 | 0.4673905085  | 9.1160443759  | 6.02583434026744e-05 | cfa   | Cyclopropane-fatty-acyl-phospholipid synthase         |
| ABZ99661 | LEPBI_II0125 | 0.265435642   | 8.355063544   | 0.006065494          | htrA1 | HtrA1; signal peptide                                 |
| ABZ99671 | LEPBI_II0135 | 0.2913320593  | 8.0229748715  | 0.004270222          | 0     | hypothetical protein                                  |
| ABZ99673 | LEPBI_II0138 | 0.3875547145  | 8.2848587832  | 0.0002809429         | 0     | hypothetical protein                                  |
| ABZ99686 | LEPBI_II0151 | 0.2977413412  | 7.9867838966  | 0.0066807725         | 0     | two-component response regulator                      |
| ABZ99691 | LEPBI_II0156 | -0.4314517267 | 8.6263575031  | 2.85400250219942e-07 | 0     | signal peptide                                        |
| ABZ99692 | LEPBI_II0157 | 0.277465917   | 8.2642200335  | 0.0066671972         | 0     | 4-coumarate--CoA ligase                               |
| ABZ99704 | LEPBI_II0169 | 0.4187187979  | 7.3511983529  | 0.0010325471         | 0     | N-carbamoyl-D-amino acid hydrolase                    |
| ABZ99705 | LEPBI_II0170 | 0.3541672602  | 7.9432972941  | 0.002254659          | argB  | acetylglutamate kinase                                |

## B\_120vs48

|          |              |               |              |                      |      |   |                                                                                          |
|----------|--------------|---------------|--------------|----------------------|------|---|------------------------------------------------------------------------------------------|
| ABZ99724 | LEPBI_I10191 | -0.6985965306 | 7.0065893202 | 3.34743440555916e-07 |      | 0 | hypothetical protein                                                                     |
| ABZ99748 | LEPBI_I10215 | 0.6826859526  | 6.8462999763 | 0.0007697921         |      | 0 | hypothetical protein                                                                     |
| ABZ99770 | LEPBI_I10237 | -0.5434593895 | 7.2700050679 | 5.54484612674846e-06 |      | 0 | two-component response regulator                                                         |
| ABZ99771 | LEPBI_I10238 | -0.4311899927 | 6.574828207  | 0.0050571826         |      | 0 | hypothetical protein                                                                     |
| ABZ99783 | LEPBI_I10250 | 0.3958211259  | 7.247079387  | 0.0012597478         |      | 0 | hypothetical protein                                                                     |
| ABZ99787 | LEPBI_I10254 | 0.3010441472  | 8.291837379  | 0.000936312          |      | 0 | glycosyl transferase                                                                     |
| ABZ99788 | LEPBI_I10255 | 0.3574557854  | 6.4791615574 | 0.0067772125         |      | 0 | hypothetical protein                                                                     |
| ABZ99789 | LEPBI_I10256 | 0.2893379889  | 8.6661173164 | 0.0081078549         |      | 0 | hypothetical protein                                                                     |
| ABZ99796 | LEPBI_I10263 | 0.3662430599  | 7.9185953632 | 0.0002660373         |      | 0 | hypothetical protein                                                                     |
| ABZ99799 | LEPBI_I10266 | 0.2967731643  | 7.8052176651 | 0.0040841681         |      | 0 | hemopexin                                                                                |
| ABZ99801 | LEPBI_I10268 | 0.2661158229  | 8.8391420368 | 0.0042132025         |      | 0 | C-terminal processing peptidase                                                          |
| ABZ99804 | LEPBI_I10271 | -0.651601784  | 5.7861411887 | 2.88159787555988e-05 |      | 0 | hypothetical protein                                                                     |
| ABZ99810 | LEPBI_I10277 | 0.3371604467  | 8.724654322  | 0.0002639945         | algI |   | alginate O-acetyltransferase                                                             |
| ABZ99815 | LEPBI_p0001  | 0.6393202348  | 7.3651490081 | 1.65073994155061e-07 |      | 0 | Putative chromosome partitioning protein ParA                                            |
| ABZ99816 | LEPBI_p0002  | 0.6555744657  | 7.2179907489 | 2.68505531370092e-05 |      | 0 | Putative chromosome partitioning protein ParB                                            |
| ABZ99817 | LEPBI_p0003  | 0.6057118967  | 5.2512951295 | 0.0023452088         |      | 0 | Putative bacteriophage protein                                                           |
| ABZ99821 | LEPBI_p0007  | 0.5914254016  | 5.8743352978 | 0.002643714          |      | 0 | Putative transcriptional regulator                                                       |
| ABZ99824 | LEPBI_p0010  | 0.6721161268  | 7.7665292155 | 1.67319172028971e-06 |      | 0 | Putative phosphoserine phosphatase; putative membrane protein                            |
| ABZ99825 | LEPBI_p0011  | 0.6519984788  | 6.830762051  | 0.0007136707         |      | 0 | Putative signal transduction histidine kinase; putative membrane protein                 |
| ABZ99827 | LEPBI_p0013  | 0.8012462728  | 7.7027560584 | 3.20384070665683e-15 | hemV |   | ABC-type hemin transport system, ATPase                                                  |
| ABZ99828 | LEPBI_p0014  | 0.9157153411  | 6.9039504166 | 1.04193191890597e-14 | hemU |   | ABC-type hemin transport system, permease; putative membrane protein                     |
| ABZ99829 | LEPBI_p0015  | 0.6768367675  | 7.1398566179 | 2.45711399227707e-08 | hemT |   | ABC-type Fe3+-hydroxamate transport system, periplasmic component                        |
| ABZ99830 | LEPBI_p0016  | 0.4954096268  | 6.2040294925 | 0.0006578796         |      | 0 | hypothetical protein                                                                     |
| ABZ99832 | LEPBI_p0018  | 0.8438482178  | 8.0859708578 | 3.29903236798477e-12 |      | 0 | Putative TonB-dependent outer membrane receptor                                          |
| ABZ99833 | LEPBI_p0019  | 0.8590605591  | 7.9931573001 | 8.48666134684224e-11 | recD |   | ATP-dependent exoDNase (exonuclease V), alpha subunit, helicase superfamily I member     |
| ABZ99834 | LEPBI_p0020  | 0.8254134955  | 8.5342270881 | 4.59627947653547e-11 | recB |   | Exodeoxyribonuclease V beta chain, UvrD subfamily                                        |
| ABZ99835 | LEPBI_p0021  | 0.8495557389  | 8.6907703717 | 3.16726925495518e-16 | recC |   | Exodeoxyribonuclease V gamma chain                                                       |
| ABZ99836 | LEPBI_p0022  | 0.8016679732  | 7.7620920425 | 7.80435453662061e-09 |      | 0 | Putative hydrolase; putative signal peptide                                              |
| ABZ99837 | LEPBI_p0023  | 0.7343732432  | 6.8247767908 | 3.45577468114401e-05 |      | 0 | Putative transcription regulator; putative membrane protein                              |
| ABZ99838 | LEPBI_p0024  | 0.9241619182  | 9.3917321385 | 2.72611633780737e-17 |      | 0 | hypothetical protein                                                                     |
| ABZ99839 | LEPBI_p0025  | 1.0306013089  | 6.1565362514 | 3.45544501841125e-13 |      | 0 | hypothetical protein                                                                     |
| ABZ99840 | LEPBI_pa0026 | 0.7158786536  | 7.5357822201 | 8.25674079927612e-09 |      | 0 | Putative antirestriction protein                                                         |
| ABZ99841 | LEPBI_p0027  | 0.7541498729  | 7.3274523354 | 3.87006883308544e-07 |      | 0 | Putative transposase                                                                     |
| ABZ99843 | LEPBI_p0029  | 0.6508955641  | 6.7618158201 | 1.64985187327397e-07 |      | 0 | Hypothetical protein; putative signal peptide                                            |
| ABZ99844 | LEPBI_p0030  | 0.748228404   | 7.33941684   | 2.88451892694582e-06 |      | 0 | hypothetical protein                                                                     |
| ABZ99846 | LEPBI_p0032  | 0.6336258789  | 6.3978836137 | 4.73173466677166e-06 |      | 0 | hypothetical protein                                                                     |
| ABZ99847 | LEPBI_p0033  | 0.8045831481  | 9.5098120683 | 3.86238795386737e-13 |      | 0 | Putative protein with DEAD/DEAH box helicase and with type III restriction enzyme motif  |
| ABZ99850 | LEPBI_p0038  | 0.9284663692  | 4.7973762941 | 5.54484612674846e-06 |      | 0 | hypothetical protein                                                                     |
| ABZ99851 | LEPBI_p0039  | 0.8276231982  | 6.7888397549 | 4.54042599221947e-10 |      | 0 | hypothetical protein                                                                     |
| ABZ99852 | LEPBI_p0040  | 1.2496819304  | 5.6013263532 | 5.20539726425048e-15 |      | 0 | hypothetical protein                                                                     |
| ABZ99853 | LEPBI_p0041  | 0.8495831905  | 7.3875574789 | 5.20539726425048e-15 |      | 0 | Hypothetical protein; putative signal peptide                                            |
| ABZ99854 | LEPBI_p0042  | 0.8308618216  | 4.3037886679 | 0.0001650338         |      | 0 | hypothetical protein                                                                     |
| ABZ99855 | LEPBI_p0043  | 0.6583605814  | 7.0849774376 | 2.26886226235785e-08 |      | 0 | ABC-type transport system, ATP binding protein                                           |
| ABZ99856 | LEPBI_p0044  | 0.7547689876  | 7.9837682777 | 2.16126361132689e-12 |      | 0 | ABC-type transport system, permease ; putative membrane protein; putative signal peptide |
| ABZ99857 | LEPBI_p0045  | 0.5925231032  | 7.0966919294 | 2.40378945295262e-05 |      | 0 | hypothetical protein                                                                     |
| ABZ99858 | LEPBI_p0046  | 0.6952142633  | 7.0790062422 | 1.49416241562169e-07 |      | 0 | Putative signal transduction histidine kinase; putative membrane protein                 |
| ABZ99859 | LEPBI_p0047  | 1.0106920196  | 6.735039807  | 3.11310645246936e-12 |      | 0 | Putative transcriptional regulator, TetR family                                          |
| ABZ99860 | LEPBI_p0048  | 0.7512394187  | 5.4939518706 | 5.77598544571485e-06 |      | 0 | Putative dihydrofolate reductase                                                         |
| ABZ99861 | LEPBI_p0049  | 0.5049058644  | 5.6754022688 | 0.0002660373         |      | 0 | hypothetical protein                                                                     |
| ABZ99862 | LEPBI_p0050  | 0.8808289665  | 5.1601873764 | 1.00451010584044e-06 |      | 0 | hypothetical protein                                                                     |
| ABZ99863 | LEPBI_p0051  | 0.781169156   | 6.9466021116 | 2.52737044569932e-10 |      | 0 | Putative rRNA methylase                                                                  |
| ABZ99864 | LEPBI_p0052  | 0.7212057001  | 6.777167293  | 3.75661765188459e-10 |      | 0 | serine/threonine protein kinase                                                          |
| ABZ99865 | LEPBI_p0053  | 0.6253708147  | 7.1939608202 | 3.76872285960213e-08 |      | 0 | Putative GGDEF/response regulator receiver domain protein                                |

## B\_120vs48

|          |             |              |              |                      |      |                                               |
|----------|-------------|--------------|--------------|----------------------|------|-----------------------------------------------|
| ABZ99866 | LEPBI_p0054 | 0.5651813728 | 7.4959403628 | 0.0002326741         | 0    | Hypothetical protein; putative signal peptide |
| ABZ99867 | LEPBI_p0055 | 0.6698015847 | 6.9780245685 | 2.32943036454988e-06 | 0    | hypothetical protein                          |
| ABZ99868 | LEPBI_p0056 | 0.7036444214 | 7.5257751057 | 1.36050070203523e-10 | mdoD | glucan biosynthesis protein D                 |
| ABZ99869 | LEPBI_p0057 | 1.0724535312 | 3.8213042137 | 0.0001615641         | 0    | hypothetical protein                          |
| ABZ99870 | LEPBI_p0058 | 0.6616252303 | 8.1383401895 | 4.66845231716461e-08 | 0    | glucosyltransferase MdoH                      |
| ABZ99871 | LEPBI_p0059 | 0.58277244   | 6.867902671  | 0.0005935163         | 0    | Putative hydrolase                            |
| ABZ99872 | LEPBI_p0060 | 0.6647449688 | 6.2775212019 | 9.6952807354787e-06  | 0    | hypothetical protein                          |
| ABZ99873 | LEPBI_p0061 | 0.4212749784 | 6.2229614625 | 0.0090082021         | 0    | Putative bacteriophage protein                |

---

**Table S5 (cont.).** Differentially expressed genes in P\_120vs48.

| Gene     | Synonym     | logFC         | logCPM       | FDR                  | Symbol | Product                                                                                                      |
|----------|-------------|---------------|--------------|----------------------|--------|--------------------------------------------------------------------------------------------------------------|
| ABZ96150 | LEPBI_I0003 | -0.3465848184 | 8.4323463739 | 0.0017083801         | recF   | DNA replication and repair protein RecF                                                                      |
| ABZ96174 | LEPBI_I0027 | -0.328927636  | 8.4751140323 | 0.0021605427         | sodB   | superoxide dismutase                                                                                         |
| ABZ96175 | LEPBI_I0028 | -0.405897426  | 9.0412007891 | 0.0006915646         | trpE   | anthranilate synthase component I                                                                            |
| ABZ96190 | LEPBI_I0043 | -0.5180716923 | 8.4109368398 | 0.0027623277         | NA     | aromatic-ring-opening dioxygenase domain-containing protein                                                  |
| ABZ96199 | LEPBI_I0052 | -0.3014755743 | 8.1845996565 | 0.0054567866         | NA     | enoyl-CoA hydratase                                                                                          |
| ABZ96204 | LEPBI_I0057 | -0.2841962476 | 8.2696206764 | 0.0099501967         | acdA2  | acyl-CoA dehydrogenase                                                                                       |
| ABZ96220 | LEPBI_I0073 | -0.33273166   | 8.5328401613 | 0.0017083801         | galK   | galactokinase                                                                                                |
| ABZ96222 | LEPBI_I0075 | 0.4838117222  | 7.2247282366 | 7.03565623348734e-05 | NA     | putative nucleotide-diphospho-sugar transferase                                                              |
| ABZ96226 | LEPBI_I0079 | -0.3388488722 | 8.2761492677 | 0.009867344          | NA     | putative proline iminopeptidase                                                                              |
| ABZ96227 | LEPBI_I0080 | -0.5915260028 | 6.7289624721 | 2.70638432364524e-06 | NA     | putative ferredoxin                                                                                          |
| ABZ96229 | LEPBI_I0082 | -0.3979858663 | 7.5763771911 | 0.004580483          | NA     | putative ribosomal RNA methyltransferase                                                                     |
| ABZ96230 | LEPBI_I0083 | -0.7715823759 | 9.5173057388 | 0.0015136719         | ispA   | geranyltranstransferase                                                                                      |
| ABZ96231 | LEPBI_I0084 | -0.3993353984 | 7.3473820632 | 0.0011998187         | ndk    | nucleoside diphosphate kinase                                                                                |
| ABZ96248 | LEPBI_I0101 | -0.5232064547 | 8.0990336105 | 1.05940095401221e-05 | NA     | hypothetical protein                                                                                         |
| ABZ96257 | LEPBI_I0110 | 0.7426734402  | 8.2890135629 | 1.64549552653353e-10 | NA     | hypothetical protein                                                                                         |
| ABZ96261 | LEPBI_I0114 | 0.4330838675  | 8.0396991711 | 0.0029574608         | NA     | sodium/bile acid cotransporter family protein                                                                |
| ABZ96266 | LEPBI_I0119 | -0.4077763597 | 7.2479034611 | 0.0059233791         | NA     | hypothetical protein                                                                                         |
| ABZ96278 | LEPBI_I0132 | 0.7818789099  | 5.5513463118 | 3.89028021179621e-05 | NA     | hypothetical protein                                                                                         |
| ABZ96280 | LEPBI_I0134 | -0.4903331863 | 8.7476751843 | 0.004950142          | NA     | hypothetical protein                                                                                         |
| ABZ96289 | LEPBI_I0144 | -1.1170872962 | 7.8637143239 | 0.0060119604         | NA     | hypothetical protein                                                                                         |
| ABZ96303 | LEPBI_I0158 | -0.4010732436 | 7.5725021812 | 0.0005226767         | NA     | hypothetical protein                                                                                         |
| ABZ96336 | LEPBI_I0191 | 0.6563135797  | 5.706934936  | 0.0003936262         | NA     | hypothetical protein                                                                                         |
| ABZ96356 | LEPBI_I0211 | 0.2973967276  | 8.0495632299 | 0.0038799754         | NA     | hypothetical protein                                                                                         |
| ABZ96358 | LEPBI_I0213 | -0.3693877193 | 6.8977483891 | 0.0080020033         | NA     | hypothetical protein                                                                                         |
| ABZ96368 | LEPBI_I0223 | -0.3491633956 | 9.8324048536 | 0.0037493651         | fad    | acyl-CoA dehydrogenase                                                                                       |
| ABZ96380 | LEPBI_I0235 | -0.4750198512 | 7.7551394192 | 0.0002563571         | rplY   | 50S ribosomal protein L25/general stress protein Ctc                                                         |
| ABZ96382 | LEPBI_I0237 | -0.3904357975 | 8.2110419304 | 0.0033416609         | glmU   | bifunctional N-acetylglucosamine-1-phosphate uridyltransferase / glucosamine-1-phosphate N-acetyltransferase |
| ABZ96383 | LEPBI_I0238 | -1.6007089214 | 8.4718942078 | 9.42565849965789e-10 | ispE   | 4-diphosphocytidyl-2-C-methyl-D-erythritol kinase                                                            |
| ABZ96387 | LEPBI_I0242 | 0.2850967207  | 8.8705302779 | 0.0051311951         | NA     | putative sodium:solute symporter                                                                             |
| ABZ96400 | LEPBI_I0255 | 0.3820221119  | 7.440287296  | 0.0021605427         | NA     | hypothetical protein                                                                                         |
| ABZ96405 | LEPBI_I0260 | -0.4046584359 | 8.2875892689 | 0.0007650903         | NA     | hypothetical protein                                                                                         |
| ABZ96412 | LEPBI_I0267 | -0.8316034554 | 9.2729552605 | 4.95235955882606e-07 | NA     | putative signal peptide                                                                                      |
| ABZ96419 | LEPBI_I0275 | -4.1249145411 | 8.7558557537 | 1.72780998473544e-13 | NA     | hypothetical protein                                                                                         |
| ABZ96420 | LEPBI_I0276 | 0.4550927367  | 7.9624156938 | 0.0001101053         | NA     | hypothetical protein                                                                                         |
| ABZ96421 | LEPBI_I0277 | -0.7556732533 | 7.6638244092 | 9.81884869969479e-11 | NA     | hypothetical protein                                                                                         |
| ABZ96424 | LEPBI_I0280 | -0.3189026883 | 9.1068650497 | 0.0059247933         | NA     | hypothetical protein                                                                                         |
| ABZ96433 | LEPBI_I0289 | -1.1460322609 | 7.5568783639 | 9.14331145628664e-06 | NA     | hypothetical protein                                                                                         |
| ABZ96445 | LEPBI_I0301 | 0.6334093689  | 5.3720011992 | 0.0005716384         | NA     | hypothetical protein                                                                                         |
| ABZ96448 | LEPBI_I0304 | -0.2687072253 | 8.1753802807 | 0.0074250362         | NA     | carbonic anhydrase/acetyltransferase                                                                         |
| ABZ96455 | LEPBI_I0311 | -0.3425432507 | 8.9218648551 | 0.0019079003         | NA     | putative signal peptide                                                                                      |
| ABZ96457 | LEPBI_I0313 | -1.0160558099 | 8.6493150698 | 7.05895075139778e-18 | NA     | putative signal peptide                                                                                      |
| ABZ96479 | LEPBI_I0336 | -0.4108872139 | 6.4029268702 | 0.0054567866         | NA     | hypothetical protein                                                                                         |
| ABZ96481 | LEPBI_I0338 | -0.4071387681 | 7.7536892697 | 0.0004225923         | NA     | enoyl-CoA hydratase                                                                                          |
| ABZ96495 | LEPBI_I0352 | -0.3930895779 | 8.3652800813 | 0.0004192106         | lpxA   | UDP-N-acetylglucosamine acyltransferase                                                                      |
| ABZ96511 | LEPBI_I0368 | 0.4186048171  | 6.6345834706 | 0.0032435295         | NA     | hypothetical protein                                                                                         |
| ABZ96513 | LEPBI_I0370 | 0.5195329249  | 6.3524406641 | 0.0030395777         | NA     | PadR family transcriptional regulator                                                                        |
| ABZ96523 | LEPBI_I0381 | 0.8874752257  | 5.4813042618 | 1.94408448451755e-06 | NA     | hypothetical protein                                                                                         |
| ABZ96541 | LEPBI_I0399 | -0.5845876581 | 5.5509963723 | 0.004326537          | NA     | hypothetical protein                                                                                         |
| ABZ96544 | LEPBI_I0402 | -0.6462942757 | 4.9885344813 | 0.0088206088         | NA     | hypothetical protein                                                                                         |
| ABZ96546 | LEPBI_I0404 | -0.4297549607 | 8.561895118  | 0.0010326024         | NA     | hypothetical protein                                                                                         |

## P\_120vs48

|          |             |               |              |                      |      |                                                              |
|----------|-------------|---------------|--------------|----------------------|------|--------------------------------------------------------------|
| ABZ96547 | LEPBI_I0405 | 0.357467459   | 7.2882325629 | 0.0092811519         | NA   | hypothetical protein                                         |
| ABZ96551 | LEPBI_I0409 | -0.4145616472 | 9.8869100175 | 0.0049005304         | NA   | hypothetical protein                                         |
| ABZ96570 | LEPBI_I0428 | -0.3968932701 | 9.0274590485 | 0.0035828206         | NA   | sodium:proton antiporter                                     |
| ABZ96627 | LEPBI_I0489 | 0.3762348404  | 8.4841156601 | 0.0001277015         | NA   | hypothetical protein                                         |
| ABZ96634 | LEPBI_I0496 | -0.5961708542 | 6.6186222019 | 0.0040349676         | NA   | putative anti-sigma-B factor antagonist                      |
| ABZ96653 | LEPBI_I0515 | -0.7051262245 | 7.635377771  | 1.68902522700376e-05 | rpsT | 30S ribosomal protein S20                                    |
| ABZ96654 | LEPBI_I0516 | -0.3176085689 | 9.0566114217 | 0.004326537          | NA   | putative phosphomannomutase/phosphoglucomutase               |
| ABZ96659 | LEPBI_I0521 | 0.6301135957  | 6.1395450172 | 0.0002758791         | NA   | anti-sigma factor antagonist                                 |
| ABZ96661 | LEPBI_I0523 | 0.4674596249  | 8.9086831264 | 6.59484277669629e-06 | NA   | putative serine-type endopeptidase                           |
| ABZ96669 | LEPBI_I0531 | -0.4650674406 | 7.0787833788 | 0.0018153566         | NA   | hypothetical protein                                         |
| ABZ96682 | LEPBI_I0544 | 0.3693400604  | 8.1492564856 | 0.0045130234         | NA   | hypothetical protein                                         |
| ABZ96690 | LEPBI_I0552 | 0.5754609544  | 6.1866651601 | 0.0048981636         | NA   | putative phospholipid/glycerol acyltransferase               |
| ABZ96699 | LEPBI_I0561 | -0.6811860413 | 9.1667038655 | 1.25143274107633e-10 | NA   | hypothetical protein                                         |
| ABZ96709 | LEPBI_I0571 | 0.3338475393  | 8.3402370778 | 0.0019725127         | NA   | putative signal peptide                                      |
| ABZ96716 | LEPBI_I0578 | -0.2961407397 | 8.9939322747 | 0.0099607003         | NA   | putative FAD dehydrogenase                                   |
| ABZ96722 | LEPBI_I0584 | -0.3556734202 | 8.0343663942 | 0.001006871          | NA   | putative S-adenosyl-L-methionine-dependent methyltransferase |
| ABZ96750 | LEPBI_I0616 | 0.6695992465  | 7.4649727953 | 0.0067209781         | NA   | alpha/beta family hydrolase                                  |
| ABZ96753 | LEPBI_I0619 | 0.4830927591  | 6.8615026577 | 0.006613847          | NA   | hypothetical protein                                         |
| ABZ96784 | LEPBI_I0651 | 0.4536402742  | 8.1363724317 | 5.2716106225958e-06  | NA   | hypothetical protein                                         |
| ABZ96815 | LEPBI_I0683 | -0.6918181067 | 7.9980262479 | 4.18489172984644e-09 | NA   | putative lipoprotein                                         |
| ABZ96842 | LEPBI_I0710 | 0.3770854141  | 7.0590613758 | 0.0037962871         | NA   | hypothetical protein                                         |
| ABZ96853 | LEPBI_I0721 | -0.4576441589 | 8.1684107458 | 0.0001959568         | NA   | putative NAD-dependent deacetylase                           |
| ABZ96867 | LEPBI_I0735 | 0.4035889653  | 6.847472028  | 0.006826869          | NA   | hypothetical protein                                         |
| ABZ96872 | LEPBI_I0740 | 0.7834298714  | 5.8012476674 | 1.82762747568574e-05 | NA   | putative PcmI family protein                                 |
| ABZ96875 | LEPBI_I0743 | 0.514184605   | 6.6995797438 | 0.0007167412         | NA   | putative transcriptional regulator                           |
| ABZ96878 | LEPBI_I0746 | 0.4179269995  | 7.3347739227 | 0.0003641866         | NA   | hypothetical protein                                         |
| ABZ96899 | LEPBI_I0768 | 0.5872757406  | 8.0289807663 | 6.10352366039483e-10 | NA   | hypothetical protein                                         |
| ABZ96912 | LEPBI_I0782 | 0.5666600892  | 8.1573744179 | 1.03353684597116e-09 | NA   | hypothetical protein                                         |
| ABZ96919 | LEPBI_I0789 | -0.3759698878 | 8.36000227   | 0.0031547638         | NA   | hypothetical protein                                         |
| ABZ96929 | LEPBI_I0801 | -0.3329384444 | 8.2062485514 | 0.0023289581         | atpB | F0F1 ATP synthase subunit A                                  |
| ABZ96930 | LEPBI_I0802 | -0.5650120267 | 7.8346278004 | 2.15546304222098e-05 | atpE | ATP synthase F0 subunit C                                    |
| ABZ96931 | LEPBI_I0803 | -0.5461266489 | 7.7456518602 | 5.2716106225958e-06  | atpF | F0F1 ATP synthase subunit B                                  |
| ABZ96932 | LEPBI_I0804 | -0.4603518622 | 7.7343555693 | 0.0012951741         | atpH | F0F1 ATP synthase subunit delta                              |
| ABZ96935 | LEPBI_I0807 | -0.3368128449 | 8.7187025318 | 0.0024344904         | atpD | F0F1 ATP synthase subunit beta                               |
| ABZ96944 | LEPBI_I0816 | 0.7077716529  | 7.1444819117 | 1.04728750418896e-07 | NA   | hypothetical protein                                         |
| ABZ96951 | LEPBI_I0824 | 0.5331950385  | 6.5269971361 | 0.000728408          | NA   | putative permease                                            |
| ABZ96962 | LEPBI_I0835 | -0.5280371932 | 7.7051666859 | 4.58464278979579e-05 | NA   | TetR family transcriptional regulator                        |
| ABZ96965 | LEPBI_I0838 | -0.4356114598 | 6.4640368087 | 0.0051308296         | NA   | hypothetical protein                                         |
| ABZ96966 | LEPBI_I0839 | -0.4032395415 | 7.7460831614 | 0.0003182494         | NA   | putative glycosyl transferase                                |
| ABZ96976 | LEPBI_I0849 | 0.3776500484  | 8.5707959044 | 0.0003056972         | NA   | ABC transporter ATP binding protein/permease                 |
| ABZ96980 | LEPBI_I0853 | 0.308086836   | 7.721263271  | 0.0060613005         | NA   | hypothetical protein                                         |
| ABZ96983 | LEPBI_I0856 | 0.4626753669  | 8.2192276718 | 9.33597969250689e-05 | NA   | hypothetical protein                                         |
| ABZ96994 | LEPBI_I0869 | -0.4075812372 | 7.7972620919 | 0.0008838864         | NA   | hypothetical protein                                         |
| ABZ96996 | LEPBI_I0871 | -0.3002181209 | 8.3998819939 | 0.0041824537         | NA   | CRP family transcriptional regulator                         |
| ABZ97010 | LEPBI_I0885 | -0.5847718762 | 9.3602059476 | 0.0021605427         | NA   | hypothetical protein                                         |
| ABZ97028 | LEPBI_I0903 | 0.3152279546  | 8.2158354469 | 0.0014745896         | nhaC | Na(+)/H(+) antiporter                                        |
| ABZ97030 | LEPBI_I0905 | -0.7377422157 | 6.8601264464 | 1.0282501503218e-06  | NA   | putative anti-sigma factor antagonist                        |
| ABZ97034 | LEPBI_I0910 | 0.3325641779  | 7.7357543236 | 0.0078719432         | NA   | hypothetical protein                                         |
| ABZ97050 | LEPBI_I0926 | 0.3416759333  | 7.9307787253 | 0.0022010686         | NA   | putative phosphoserine phosphatase RsbU                      |
| ABZ97055 | LEPBI_I0931 | 0.2950431665  | 8.5850541652 | 0.0054795742         | NA   | hypothetical protein                                         |
| ABZ97058 | LEPBI_I0934 | -0.5333537281 | 5.6268364943 | 0.0047760708         | NA   | hypothetical protein                                         |
| ABZ97062 | LEPBI_I0938 | 0.3399664328  | 8.0099583467 | 0.0080721675         | NA   | putative protein-disulfide reductase                         |
| ABZ97075 | LEPBI_I0951 | -0.6452430388 | 7.3313405598 | 1.93796242105673e-05 | gmk  | guanylate kinase                                             |

## P\_120vs48

|          |             |               |              |                      |      |                                                                    |
|----------|-------------|---------------|--------------|----------------------|------|--------------------------------------------------------------------|
| ABZ97081 | LEPBI_I0957 | -2.1620668067 | 9.281950417  | 2.1470020841257e-17  | NA   | hypothetical protein                                               |
| ABZ97086 | LEPBI_I0962 | 0.3800765649  | 8.4361789715 | 0.0022147949         | NA   | hypothetical protein                                               |
| ABZ97098 | LEPBI_I0974 | -0.4922121195 | 7.1308126772 | 0.0011526081         | tatA | Sec-independent protein secretion pathway component TatA/E         |
| ABZ97112 | LEPBI_I0988 | -0.4766082864 | 9.280791194  | 0.0007924677         | NA   | hypothetical protein                                               |
| ABZ97128 | LEPBI_I1004 | -0.3637572018 | 7.7580367082 | 0.0037219056         | NA   | hypothetical protein                                               |
| ABZ97145 | LEPBI_I1022 | 0.3970933623  | 7.6863675176 | 0.0092727873         | NA   | hypothetical protein                                               |
| ABZ97165 | LEPBI_I1042 | 0.3087027664  | 9.1121425664 | 0.0023289581         | NA   | putative phosphoserine phosphatase RsbP                            |
| ABZ97175 | LEPBI_I1052 | -0.7669480648 | 7.2850766584 | 7.32130342108601e-06 | NA   | hypothetical protein                                               |
| ABZ97183 | LEPBI_I1060 | -0.4731344035 | 7.1009797609 | 0.0004076831         | NA   | hypothetical protein                                               |
| ABZ97186 | LEPBI_I1063 | 0.2905313499  | 7.9681567943 | 0.0071163786         | aniA | copper-containing nitrite reductase                                |
| ABZ97192 | LEPBI_I1069 | 0.3990147448  | 8.3096426587 | 6.53723240992135e-05 | NA   | putative two-component response regulator                          |
| ABZ97199 | LEPBI_I1078 | 0.4574818911  | 7.6273280551 | 0.0007709657         | NA   | putative two-component hybrid sensor and regulator                 |
| ABZ97200 | LEPBI_I1079 | 0.5072203954  | 6.0971547346 | 0.0018153566         | NA   | putative two-component response regulator                          |
| ABZ97201 | LEPBI_I1080 | 0.3199804716  | 8.205252581  | 0.0020618473         | NA   | putative adenylate cyclase                                         |
| ABZ97202 | LEPBI_I1081 | 0.3590075031  | 7.5242872954 | 0.003542725          | NA   | hypothetical protein                                               |
| ABZ97205 | LEPBI_I1084 | -0.2748669565 | 8.329559309  | 0.007553353          | NA   | hypothetical protein                                               |
| ABZ97246 | LEPBI_I1127 | 0.4054595067  | 7.9730459052 | 0.0001074543         | NA   | putative competence protein                                        |
| ABZ97249 | LEPBI_I1131 | -0.4008582738 | 7.5284883987 | 0.0068638911         | NA   | putative signal peptide                                            |
| ABZ97250 | LEPBI_I1132 | -0.4788290221 | 7.175594265  | 0.0002378597         | etfA | electron transfer flavoprotein subunit alpha                       |
| ABZ97251 | LEPBI_I1133 | -0.6203013669 | 7.6392210962 | 1.46770287451628e-05 | etfB | electron transfer flavoprotein subunit beta                        |
| ABZ97256 | LEPBI_I1139 | 0.3370518426  | 8.6360545257 | 0.0015337905         | NA   | hypothetical protein                                               |
| ABZ97266 | LEPBI_I1150 | 0.5809741606  | 7.8572688471 | 3.65943042617853e-06 | NA   | putative cAMP binding protein                                      |
| ABZ97277 | LEPBI_I1161 | 0.4889519945  | 7.2827981765 | 5.63716442842716e-05 | NA   | putative signal peptide                                            |
| ABZ97287 | LEPBI_I1171 | -0.3557509164 | 8.7129464391 | 0.0012631007         | hemA | glutamyl-tRNA reductase                                            |
| ABZ97290 | LEPBI_I1174 | 0.4851144725  | 6.4494143414 | 0.0040349676         | NA   | hypothetical protein                                               |
| ABZ97291 | LEPBI_I1175 | -0.8705754228 | 9.6792875369 | 0.0054005054         | NA   | hypothetical protein                                               |
| ABZ97299 | LEPBI_I1183 | -0.2729549951 | 8.7331599331 | 0.0075216107         | cysD | sulfate adenyltransferase subunit 2                                |
| ABZ97301 | LEPBI_I1185 | 0.3665529412  | 7.1210106645 | 0.007946382          | cysA | sulfate/thiosulfate ABC transporter ATP-binding protein            |
| ABZ97309 | LEPBI_I1193 | 0.3873401455  | 7.3902106343 | 0.0046359276         | NA   | hypothetical protein                                               |
| ABZ97319 | LEPBI_I1205 | 0.4720799667  | 6.4186494239 | 0.0099501967         | NA   | putative integrase/recombinase                                     |
| ABZ97323 | LEPBI_I1209 | 0.5542114114  | 5.8008616387 | 0.0008838864         | NA   | hypothetical protein                                               |
| ABZ97333 | LEPBI_I1219 | -0.3572069761 | 8.3426694355 | 0.0008588362         | NA   | putative sensory transduction histidine kinase                     |
| ABZ97345 | LEPBI_I1231 | -0.2704337094 | 8.571468184  | 0.0080281612         | NA   | hypothetical protein                                               |
| ABZ97353 | LEPBI_I1240 | -0.5142059784 | 7.4850084556 | 0.000131053          | NA   | putative dihydrofolate reductase                                   |
| ABZ97355 | LEPBI_I1242 | 0.5305519238  | 6.4626730223 | 0.0068534504         | NA   | hypothetical protein                                               |
| ABZ97364 | LEPBI_I1252 | -0.318763004  | 8.5399821618 | 0.0014831965         | NA   | putative signal peptide                                            |
| ABZ97370 | LEPBI_I1258 | 0.3194115253  | 8.0800415226 | 0.0093895845         | NA   | putative methyl-accepting chemotaxis protein                       |
| ABZ97388 | LEPBI_I1278 | -0.3370701585 | 8.4014578635 | 0.0021972565         | NA   | hypothetical protein                                               |
| ABZ97396 | LEPBI_I1286 | 0.6649565608  | 6.810047695  | 0.000214523          | NA   | hypothetical protein                                               |
| ABZ97404 | LEPBI_I1294 | 0.4892476826  | 5.5804958818 | 0.0053415299         | NA   | hypothetical protein                                               |
| ABZ97431 | LEPBI_I1321 | -0.4570984378 | 6.2756291366 | 0.0074860312         | NA   | putative anti-sigma factor antagonist                              |
| ABZ97437 | LEPBI_I1327 | -0.5544801912 | 6.7889999511 | 0.00038669           | NA   | hypothetical protein                                               |
| ABZ97440 | LEPBI_I1330 | 0.4568608155  | 6.9932534404 | 0.0037962871         | NA   | hypothetical protein                                               |
| ABZ97464 | LEPBI_I1354 | 0.8169125225  | 5.5186133886 | 0.0001217471         | NA   | hypothetical protein                                               |
| ABZ97472 | LEPBI_I1362 | 0.3188488487  | 8.6948323718 | 0.0025535563         | NA   | putative alkaline phosphatase                                      |
| ABZ97477 | LEPBI_I1368 | -0.619797769  | 7.2820459311 | 1.04728750418896e-07 | NA   | putative cytochrome c3                                             |
| ABZ97480 | LEPBI_I1371 | -0.3606669048 | 7.4668511821 | 0.0052729234         | NA   | hypothetical protein                                               |
| ABZ97486 | LEPBI_I1377 | 0.419497494   | 7.4564660655 | 0.0058224056         | NA   | hypothetical protein                                               |
| ABZ97494 | LEPBI_I1385 | 0.2759501202  | 8.1974771754 | 0.0082387023         | NA   | putative membrane associated metalloendopeptidase                  |
| ABZ97496 | LEPBI_I1387 | 0.444662856   | 7.6144755967 | 0.0019118157         | thiL | thiamine-monophosphate kinase                                      |
| ABZ97497 | LEPBI_I1388 | -0.4699434838 | 7.5491950141 | 0.0003641866         | rplM | 50S ribosomal protein L13                                          |
| ABZ97503 | LEPBI_I1394 | -0.2866911277 | 8.0707963468 | 0.0094337249         | lolA | outer membrane lipoprotein carrier protein                         |
| ABZ97506 | LEPBI_I1397 | -0.4313458529 | 7.2504729341 | 0.0013619918         | NA   | CDP-diacylglycerol--glycerol-3-phosphate 3-phosphatidyltransferase |

## P\_120vs48

|          |             |               |              |                      |       |                                                                    |
|----------|-------------|---------------|--------------|----------------------|-------|--------------------------------------------------------------------|
| ABZ97511 | LEPBI_11402 | 0.3382388341  | 7.5856883833 | 0.0065867363         | secF  | preprotein translocase subunit SecF                                |
| ABZ97515 | LEPBI_11406 | -0.3876398463 | 8.4976351788 | 0.0006532676         | ribBA | riboflavin biosynthesis protein RibA                               |
| ABZ97541 | LEPBI_11433 | 0.2738943408  | 8.2793048531 | 0.0098929222         | NA    | hypothetical protein                                               |
| ABZ97546 | LEPBI_11438 | 0.5062369477  | 5.8008355338 | 0.0061640951         | NA    | putative cAMP-binding protein                                      |
| ABZ97551 | LEPBI_11443 | 0.5836237296  | 5.8348426212 | 0.0007650903         | NA    | putative transcriptional regulator                                 |
| ABZ97553 | LEPBI_11445 | -0.5749152242 | 7.0961037277 | 8.75388598098079e-06 | NA    | hypothetical protein                                               |
| ABZ97567 | LEPBI_11460 | -0.5124783123 | 8.4802439142 | 7.88930375617459e-05 | NA    | hypothetical protein                                               |
| ABZ97570 | LEPBI_11463 | 0.4383238343  | 7.86280289   | 4.11643134269312e-05 | NA    | putative ribosomal subunit pseudouridine synthase                  |
| ABZ97596 | LEPBI_11489 | 0.6172324745  | 5.5595576434 | 0.003486031          | NA    | ankyrin repeat-containing protein                                  |
| ABZ97600 | LEPBI_11493 | 0.5468990303  | 6.3969064779 | 0.0010253742         | NA    | putative lipocalin                                                 |
| ABZ97603 | LEPBI_11496 | 0.4466042181  | 6.9865158125 | 0.0030547946         | gclK  | glucokinase                                                        |
| ABZ97604 | LEPBI_11497 | -0.4621631696 | 7.4631599078 | 0.0008351309         | NA    | ABC transporter ATP-binding protein                                |
| ABZ97623 | LEPBI_11516 | 0.3958701853  | 7.0204290069 | 0.0055328253         | NA    | hypothetical protein                                               |
| ABZ97630 | LEPBI_11523 | -0.6444685622 | 6.8410351384 | 0.002294038          | NA    | hypothetical protein                                               |
| ABZ97656 | LEPBI_11549 | 0.4486276545  | 7.5122760919 | 0.000120926          | NA    | two-component response regulator                                   |
| ABZ97660 | LEPBI_11553 | -0.5446194324 | 7.5904339659 | 0.0019685283         | NA    | hypothetical protein                                               |
| ABZ97661 | LEPBI_11554 | 0.4902948749  | 7.4941545673 | 0.0002378597         | pgsA  | CDP-diacylglycerol--glycerol-3-phosphate 3-phosphatidyltransferase |
| ABZ97671 | LEPBI_11564 | -1.3451265131 | 6.2415586079 | 5.7468233958364e-05  | rpsU  | 30S ribosomal protein S21                                          |
| ABZ97681 | LEPBI_11574 | 0.5707306153  | 6.3430604353 | 0.0001074543         | NA    | hypothetical protein                                               |
| ABZ97694 | LEPBI_11587 | 0.2784712262  | 8.5001861303 | 0.0065867363         | NA    | putative sensor protein                                            |
| ABZ97696 | LEPBI_11589 | -0.9717123837 | 8.4983223575 | 4.34537187255095e-11 | flaB  | flagellar filament core protein FlaB                               |
| ABZ97700 | LEPBI_11593 | 0.2609946438  | 8.3438819231 | 0.0091538749         | metY  | O-acetylhomoserine sulfhydrylase                                   |
| ABZ97703 | LEPBI_11596 | 0.4551487875  | 7.0980862131 | 0.0065416958         | NA    | hypothetical protein                                               |
| ABZ97704 | LEPBI_11597 | -0.5761282289 | 8.110539693  | 1.98198142460178e-05 | NA    | putative signal peptide                                            |
| ABZ97722 | LEPBI_11615 | -0.4177424183 | 9.0272675576 | 0.0020252339         | guaA  | GMP synthase                                                       |
| ABZ97764 | LEPBI_11657 | -0.3431143073 | 7.9988839882 | 0.0053220268         | fmt   | methionyl-tRNA formyltransferase                                   |
| ABZ97767 | LEPBI_11660 | -0.6941143348 | 5.13305053   | 0.0032001374         | rpsP  | 30S ribosomal protein S16                                          |
| ABZ97768 | LEPBI_11661 | -0.6708884051 | 7.6380244726 | 0.0024614061         | NA    | RNA-binding protein                                                |
| ABZ97790 | LEPBI_11683 | 0.4285502391  | 8.3825894498 | 9.43947665530121e-05 | ftsA2 | cell division protein FtsA                                         |
| ABZ97796 | LEPBI_11689 | 0.7010205183  | 5.3304241323 | 0.0019220475         | NA    | hypothetical protein                                               |
| ABZ97806 | LEPBI_11700 | 0.614113179   | 6.4361794058 | 2.15546304222098e-05 | NA    | hypothetical protein                                               |
| ABZ97812 | LEPBI_11706 | -0.3893918253 | 7.2063703734 | 0.0034878297         | clpP1 | ATP-dependent Clp protease proteolytic subunit                     |
| ABZ97830 | LEPBI_11724 | -0.4344393178 | 7.2087294425 | 0.0016423136         | NA    | hypothetical protein                                               |
| ABZ97833 | LEPBI_11727 | 0.383043048   | 7.0264102162 | 0.0044696323         | NA    | putative signal peptide                                            |
| ABZ97847 | LEPBI_11741 | -0.6096007945 | 6.7762049247 | 6.40154794650362e-05 | NA    | putative anti-sigma factor antagonist                              |
| ABZ97865 | LEPBI_11759 | 0.3193953086  | 7.4184519401 | 0.0080281612         | mraY  | phospho-N-acetylmuramoyl-pentapeptide-transferase                  |
| ABZ97870 | LEPBI_11764 | -0.6228538715 | 8.1274781223 | 3.18446572337306e-08 | cheR  | chemotaxis protein methyltransferase                               |
| ABZ97875 | LEPBI_11769 | 0.2950183011  | 8.3331070104 | 0.0065652539         | NA    | hypothetical protein                                               |
| ABZ97879 | LEPBI_11773 | -0.5110144404 | 6.4431406362 | 0.00313964           | rplU  | 50S ribosomal protein L21                                          |
| ABZ97880 | LEPBI_11774 | -0.5435934982 | 6.9144571884 | 0.002294038          | NA    | putative ribosomal protein                                         |
| ABZ97885 | LEPBI_11779 | -0.7296208477 | 6.4327019678 | 1.39521919762484e-06 | NA    | putative nicotinate-nucleotide adenyltransferase                   |
| ABZ97888 | LEPBI_11782 | 0.5649394692  | 5.9732500918 | 0.0011526081         | NA    | hypothetical protein                                               |
| ABZ97921 | LEPBI_11815 | 0.3052269425  | 8.308784681  | 0.0021493551         | NA    | (dimethylallyl)adenosine tRNA methylthiotransferase                |
| ABZ97924 | LEPBI_11818 | -0.274117727  | 8.4685618137 | 0.0064317899         | NA    | putative poly(beta-D-mannuronate) O-acetylase                      |
| ABZ97925 | LEPBI_11819 | 0.5972487133  | 6.8172144328 | 2.28980566678375e-05 | NA    | hypothetical protein                                               |
| ABZ97927 | LEPBI_11821 | -0.6567012229 | 8.3562674465 | 4.43669557354016e-06 | uppP  | undecaprenyl-diphosphatase                                         |
| ABZ97930 | LEPBI_11824 | 0.436884963   | 6.946530594  | 0.0006648421         | panC  | pantoate--beta-alanine ligase                                      |
| ABZ97950 | LEPBI_11844 | 0.3925921857  | 8.0886165341 | 0.0001106337         | NA    | hypothetical protein                                               |
| ABZ97951 | LEPBI_11845 | 0.2685393125  | 8.0356859749 | 0.0094337249         | leuA  | 2-isopropylmalate synthase                                         |
| ABZ97952 | LEPBI_11846 | 0.482511026   | 7.3132920096 | 1.98198142460178e-05 | hisC  | histidinol-phosphate aminotransferase                              |
| ABZ97963 | LEPBI_11859 | 0.3923973953  | 7.3813533047 | 0.0019118157         | NA    | putative signal peptide                                            |
| ABZ98018 | LEPBI_11915 | 0.5100547529  | 5.5744013333 | 0.006826869          | NA    | putative metal-sulfur cluster biosynthetic enzyme                  |
| ABZ98040 | LEPBI_11937 | 0.3378012992  | 8.073085546  | 0.0036310449         | NA    | putative histidine kinase sensor protein                           |



## P\_120vs48

|          |             |               |              |                      |       |                                                           |
|----------|-------------|---------------|--------------|----------------------|-------|-----------------------------------------------------------|
| ABZ98042 | LEPBI_I1939 | -0.4608864546 | 7.6291786255 | 0.0013889124         | rpoA  | DNA-directed RNA polymerase subunit alpha                 |
| ABZ98046 | LEPBI_I1943 | -1.3012004398 | 7.0649249356 | 2.82844185079457e-15 | infA  | translation initiation factor IF-1                        |
| ABZ98054 | LEPBI_I1951 | -0.3721758938 | 7.8034519721 | 0.00313964           | rpsH  | 30S ribosomal protein S8                                  |
| ABZ98069 | LEPBI_I1966 | -0.5326244362 | 9.1924111814 | 0.0004933729         | tuf   | elongation factor Tu                                      |
| ABZ98071 | LEPBI_I1968 | -0.4567180651 | 7.8629596368 | 0.0040817191         | rpsG  | 30S ribosomal protein S7                                  |
| ABZ98072 | LEPBI_I1969 | -0.4591488149 | 8.4920131929 | 4.1487307279546e-05  | rpsL  | 30S ribosomal protein S12                                 |
| ABZ98080 | LEPBI_I1978 | -0.6975435551 | 5.7905125906 | 0.0011526081         | secE  | preprotein translocase subunit SecE                       |
| ABZ98087 | LEPBI_I1985 | 0.3724359339  | 7.6745792088 | 0.0045296023         | NA    | putative acyltransferase                                  |
| ABZ98089 | LEPBI_I1987 | 0.3662654341  | 8.0286143262 | 0.0005199323         | NA    | putative signal peptide                                   |
| ABZ98095 | LEPBI_I1993 | 0.4505489848  | 8.5142399608 | 0.0018618739         | NA    | hypothetical protein                                      |
| ABZ98096 | LEPBI_I1994 | 0.3835346035  | 8.2818491349 | 0.0014831965         | NA    | putative glycosyltransferase                              |
| ABZ98099 | LEPBI_I1997 | -0.3847666029 | 7.8181494047 | 0.0043311562         | NA    | putative glycosyltransferase                              |
| ABZ98103 | LEPBI_I2001 | 0.3882873387  | 8.1249119278 | 0.0006166455         | NA    | putative glycosyltransferase                              |
| ABZ98110 | LEPBI_I2008 | 0.4188204849  | 8.4368947925 | 0.0017277645         | NA    | putative poly(beta-D-mannuronate) O-acetylase             |
| ABZ98111 | LEPBI_I2009 | 0.3880188558  | 7.2907612861 | 0.0034878297         | NA    | putative glycosyltransferase                              |
| ABZ98124 | LEPBI_I2022 | 0.3694977983  | 7.145317483  | 0.0082210961         | NA    | putative acetyltransferase                                |
| ABZ98132 | LEPBI_I2030 | 0.4899280822  | 6.4331027959 | 0.0035924796         | NA    | hypothetical protein                                      |
| ABZ98145 | LEPBI_I2043 | -0.2901231507 | 8.1802768376 | 0.0054836794         | NA    | putative acyltransferase                                  |
| ABZ98172 | LEPBI_I2070 | -0.5720153375 | 8.6856363965 | 8.56350509239383e-08 | NA    | hypothetical protein                                      |
| ABZ98183 | LEPBI_I2081 | 0.3200003079  | 7.4557307052 | 0.0089433944         | pgk   | phosphoglycerate kinase                                   |
| ABZ98202 | LEPBI_I2100 | -0.4433328591 | 6.9863550498 | 0.0082387023         | rpsF  | 30S ribosomal protein S6                                  |
| ABZ98203 | LEPBI_I2101 | 0.3811159406  | 7.2525426765 | 0.00208198           | NA    | hypothetical protein                                      |
| ABZ98229 | LEPBI_I2127 | -0.4439884125 | 7.8895959439 | 1.98198142460178e-05 | NA    | hypothetical protein                                      |
| ABZ98231 | LEPBI_I2129 | 0.3169588587  | 7.6087470967 | 0.0065512108         | NA    | hypothetical protein                                      |
| ABZ98234 | LEPBI_I2132 | -0.456614467  | 8.0151454016 | 0.0062275734         | flaB3 | flagellar filament 35 kDa core protein                    |
| ABZ98235 | LEPBI_I2133 | -0.365326289  | 8.7972458296 | 0.0041824537         | flaB2 | flagellar filament 35 kDa core protein                    |
| ABZ98239 | LEPBI_I2137 | 0.4101756206  | 7.1096209818 | 0.0011327165         | NA    | hypothetical protein                                      |
| ABZ98248 | LEPBI_I2146 | -0.7088020841 | 7.0288711353 | 0.000374096          | NA    | putative sigma-54 modulation protein                      |
| ABZ98249 | LEPBI_I2147 | 0.5505289897  | 5.8837548873 | 0.0085907083         | NA    | hypothetical protein                                      |
| ABZ98266 | LEPBI_I2165 | 0.9116768543  | 3.6392790013 | 0.0094090969         | NA    | hypothetical protein                                      |
| ABZ98268 | LEPBI_I2168 | -0.6301276289 | 6.0291875888 | 0.0005935716         | NA    | hypothetical protein                                      |
| ABZ98271 | LEPBI_I2172 | 0.4562057128  | 6.7394356694 | 0.0082387023         | NA    | hypothetical protein                                      |
| ABZ98275 | LEPBI_I2176 | 0.4615236662  | 6.6494428545 | 0.0022432391         | NA    | hypothetical protein                                      |
| ABZ98278 | LEPBI_I2179 | 0.5992845125  | 6.1121609277 | 0.0007924677         | NA    | hypothetical protein                                      |
| ABZ98285 | LEPBI_I2186 | 0.4410375691  | 6.8836942332 | 0.0011526081         | NA    | hypothetical protein                                      |
| ABZ98291 | LEPBI_I2192 | 0.57123878    | 6.0031216541 | 0.000943771          | NA    | hypothetical protein                                      |
| ABZ98293 | LEPBI_I2194 | 0.7200567332  | 5.1120133647 | 0.0037493651         | NA    | hypothetical protein                                      |
| ABZ98296 | LEPBI_I2197 | 0.8191865784  | 4.9869206723 | 0.0001904381         | NA    | hypothetical protein                                      |
| ABZ98304 | LEPBI_I2205 | 0.4330638072  | 6.4664330422 | 0.0094790597         | NA    | hypothetical protein                                      |
| ABZ98312 | LEPBI_I2214 | 0.4423273795  | 7.6632001577 | 0.0019404214         | NA    | hypothetical protein                                      |
| ABZ98318 | LEPBI_I2220 | 0.4025742308  | 6.5452615378 | 0.0077156595         | NA    | hypothetical protein                                      |
| ABZ98331 | LEPBI_I2234 | 0.6903418577  | 4.9382457877 | 0.0059233791         | NA    | hypothetical protein                                      |
| ABZ98335 | LEPBI_I2239 | 0.7102533784  | 5.2054237171 | 0.0020618473         | NA    | hypothetical protein                                      |
| ABZ98341 | LEPBI_I2245 | 0.6392857686  | 6.05871683   | 0.0004849397         | NA    | hypothetical protein                                      |
| ABZ98352 | LEPBI_I2256 | 0.7906239141  | 5.3911615877 | 5.93555956240899e-05 | NA    | putative plasmid maintenance system antidote-like protein |
| ABZ98362 | LEPBI_I2266 | -0.3438949185 | 7.4805704326 | 0.0085907083         | NA    | hypothetical protein                                      |
| ABZ98375 | LEPBI_I2280 | -0.4900438177 | 7.1885242585 | 0.0011526081         | NA    | hypothetical protein                                      |
| ABZ98376 | LEPBI_I2281 | 0.4434832444  | 7.0271391164 | 0.0007155401         | NA    | glycosyl transferase family protein                       |
| ABZ98395 | LEPBI_I2300 | -0.5243272498 | 7.289483981  | 0.0001890673         | trxA2 | thioredoxin                                               |
| ABZ98401 | LEPBI_I2306 | 0.3393290669  | 8.3246879529 | 0.0017750874         | NA    | putative signal peptide                                   |
| ABZ98402 | LEPBI_I2307 | 0.3060571767  | 7.9480891015 | 0.0080020033         | NA    | hypothetical protein                                      |
| ABZ98427 | LEPBI_I2335 | -0.3841106363 | 7.4555872494 | 0.0028310494         | flaA1 | flagellar filament outer layer protein A                  |
| ABZ98453 | LEPBI_I2362 | -0.2893281292 | 8.7556402926 | 0.0032696034         | ilvB2 | acetolactate synthase large subunit                       |

## P\_120vs48

|          |             |               |              |                      |       |                                                  |
|----------|-------------|---------------|--------------|----------------------|-------|--------------------------------------------------|
| ABZ98462 | LEPBI_I2371 | 2.174346113   | 4.6391423933 | 5.1573692738627e-18  | NA    | hypothetical protein                             |
| ABZ98471 | LEPBI_I2381 | 0.4274560033  | 7.0593995773 | 0.0058673116         | NA    | hypothetical protein                             |
| ABZ98489 | LEPBI_I2399 | -0.7676223157 | 5.5448259099 | 0.0017123876         | rpmI  | 50S ribosomal protein L35                        |
| ABZ98490 | LEPBI_I2400 | -0.594656606  | 8.3213669627 | 0.0022432391         | infC  | translation initiation factor IF-3               |
| ABZ98517 | LEPBI_I2428 | -0.3973430014 | 7.3187197921 | 0.0016927379         | pyrE  | orotate phosphoribosyltransferase                |
| ABZ98522 | LEPBI_I2433 | 0.5476873842  | 6.3470128417 | 0.0062752397         | NA    | putative globin                                  |
| ABZ98606 | LEPBI_I2522 | 0.3147371557  | 8.5283840581 | 0.0069094998         | NA    | hypothetical protein                             |
| ABZ98607 | LEPBI_I2523 | 0.3345433012  | 7.6675402688 | 0.0078229655         | NA    | hypothetical protein                             |
| ABZ98611 | LEPBI_I2527 | 0.5253695297  | 7.2658920621 | 0.0005723503         | NA    | hypothetical protein                             |
| ABZ98613 | LEPBI_I2529 | 0.8647976746  | 6.8129801391 | 8.95390732328848e-06 | NA    | hypothetical protein                             |
| ABZ98614 | LEPBI_I2530 | 0.6114873347  | 6.5164962668 | 0.0020182097         | NA    | hypothetical protein                             |
| ABZ98615 | LEPBI_I2531 | 0.5785644997  | 6.71072081   | 0.0001218824         | NA    | hypothetical protein                             |
| ABZ98618 | LEPBI_I2537 | 0.3264343006  | 8.1946182144 | 0.0040798439         | NA    | hypothetical protein                             |
| ABZ98677 | LEPBI_I2598 | 0.375564513   | 7.5386196949 | 0.0041824537         | aroA  | 3-phosphoshikimate 1-carboxyvinyltransferase     |
| ABZ98680 | LEPBI_I2601 | -0.4017408618 | 7.5127624705 | 0.0010865491         | NA    | hypothetical protein                             |
| ABZ98682 | LEPBI_I2603 | 0.7252847806  | 7.5041439136 | 0.007946382          | NA    | hypothetical protein                             |
| ABZ98689 | LEPBI_I2610 | -0.3697891855 | 8.9900237414 | 0.0001959568         | NA    | membrane-associated Zn-dependent metalloprotease |
| ABZ98692 | LEPBI_I2613 | 0.4821344626  | 5.7952043528 | 0.0073197637         | uppS  | undecaprenyl pyrophosphate synthase              |
| ABZ98704 | LEPBI_I2624 | -0.3844204861 | 7.3014459958 | 0.0078916475         | NA    | putative AraC-type transcriptional regulator     |
| ABZ98708 | LEPBI_I2629 | -0.5955289799 | 7.6663611145 | 1.98198142460178e-05 | NA    | rhodanese-like domain-containing protein         |
| ABZ98709 | LEPBI_I2630 | 0.3502133521  | 8.00753974   | 0.0024746209         | NA    | putative hydroxyacylglutathione hydrolase        |
| ABZ98710 | LEPBI_I2631 | -0.3215486457 | 8.0910440011 | 0.0091365632         | NA    | hypothetical protein                             |
| ABZ98712 | LEPBI_I2633 | -0.5393487251 | 8.0872755338 | 2.48694537893918e-05 | msrA2 | peptide methionine sulfoxide reductase MsrA      |
| ABZ98724 | LEPBI_I2645 | -0.845163584  | 7.3781310611 | 8.15776676589459e-08 | acpS  | holo-[acyl-carrier-protein] synthase             |
| ABZ98727 | LEPBI_I2648 | 0.3154686276  | 8.0094377462 | 0.0078225683         | NA    | hypothetical protein                             |
| ABZ98739 | LEPBI_I2661 | -0.3804542882 | 7.3905641187 | 0.0036599185         | cheX  | chemotaxis protein                               |
| ABZ98749 | LEPBI_I2671 | 0.326460478   | 8.1451950262 | 0.0014060257         | NA    | hypothetical protein                             |
| ABZ98754 | LEPBI_I2676 | -0.9094310533 | 8.6629562717 | 3.49427794291579e-12 | NA    | CarD family transcriptional regulator            |
| ABZ98759 | LEPBI_I2681 | -0.532529574  | 7.5907715913 | 0.0004566523         | ctaF  | cytochrome c oxidase polypeptide IVB             |
| ABZ98771 | LEPBI_I2693 | -0.6677936756 | 6.880796331  | 1.47885344619054e-06 | NA    | hypothetical protein                             |
| ABZ98774 | LEPBI_I2696 | 0.7587049493  | 5.2717665703 | 0.0007555075         | NA    | hypothetical protein                             |
| ABZ98794 | LEPBI_I2716 | 0.383646399   | 7.7450315557 | 0.0040349676         | NA    | putative iron-sulfur cluster-binding protein     |
| ABZ98831 | LEPBI_I2753 | 0.5379980954  | 6.304908465  | 0.0023088549         | NA    | hypothetical protein                             |
| ABZ98836 | LEPBI_I2758 | 0.5001740379  | 6.2094193211 | 0.0016303694         | NA    | hypothetical protein                             |
| ABZ98840 | LEPBI_I2762 | 0.4144753481  | 8.1605496225 | 5.0770304536292e-05  | NA    | putative iron-regulated membrane protein         |
| ABZ98851 | LEPBI_I2774 | 0.7351919467  | 7.3436874777 | 1.97335246900228e-08 | moaA  | molybdenum cofactor biosynthesis protein A       |
| ABZ98860 | LEPBI_I2783 | -0.4007530997 | 7.185974713  | 0.0088241096         | NA    | hypothetical protein                             |
| ABZ98891 | LEPBI_I2816 | 0.4424405276  | 7.0312547752 | 0.0037219056         | NA    | hypothetical protein                             |
| ABZ98893 | LEPBI_I2818 | 0.6089885817  | 7.2377712193 | 1.4857128630473e-07  | NA    | hypothetical protein                             |
| ABZ98895 | LEPBI_I2820 | 0.4666128719  | 7.4968734428 | 0.0002257826         | NA    | hypothetical protein                             |
| ABZ98900 | LEPBI_I2825 | 0.3713572877  | 8.4659944067 | 0.000613198          | NA    | hypothetical protein                             |
| ABZ98902 | LEPBI_I2828 | 0.5418725897  | 6.0913107468 | 0.0027586343         | NA    | hypothetical protein                             |
| ABZ98905 | LEPBI_I2834 | 0.8464552546  | 7.7202881334 | 0.000131053          | NA    | hypothetical protein                             |
| ABZ98906 | LEPBI_I2835 | 0.4672998216  | 7.6840750155 | 0.0008838864         | NA    | putative signal peptide                          |
| ABZ98921 | LEPBI_I2851 | 0.3560500078  | 8.2449518225 | 0.0016558563         | NA    | putative signal peptide                          |
| ABZ98958 | LEPBI_I2889 | -0.3925537003 | 7.8212934196 | 0.0018230637         | NA    | glycosyl transferase family protein              |
| ABZ98960 | LEPBI_I2891 | -0.5065120013 | 8.84874063   | 1.28014190713094e-07 | icd   | isocitrate dehydrogenase                         |
| ABZ98973 | LEPBI_I2904 | -0.3915298635 | 7.4253716062 | 0.0008838864         | tpx   | thiol peroxidase                                 |
| ABZ98975 | LEPBI_I2906 | -0.3658912828 | 8.8711003382 | 0.0012536338         | NA    | hypothetical protein                             |
| ABZ98979 | LEPBI_I2910 | -0.5002691015 | 8.2095073495 | 9.02074381055783e-05 | NA    | putative transporter                             |
| ABZ98994 | LEPBI_I2925 | 0.466330237   | 7.3406666628 | 2.93436725945587e-05 | msrA1 | peptide methionine sulfoxide reductase MsrA      |
| ABZ98996 | LEPBI_I2927 | -1.5424327656 | 8.8006624451 | 0.0020302318         | NA    | hypothetical protein                             |
| ABZ99001 | LEPBI_I2932 | -0.4624684794 | 8.8679048014 | 0.000613198          | NA    | RNA polymerase ECF-type sigma factor             |

## P\_120vs48

|          |             |               |              |                      |       |                                                                |
|----------|-------------|---------------|--------------|----------------------|-------|----------------------------------------------------------------|
| ABZ99004 | LEPBI_I2935 | -0.444713747  | 8.9862083644 | 3.89028021179621e-05 | NA    | hypothetical protein                                           |
| ABZ99014 | LEPBI_I2946 | 0.4365651833  | 8.3321432166 | 0.0005675909         | fliG1 | flagellar motor switch protein FliG                            |
| ABZ99023 | LEPBI_I2955 | -0.3588962583 | 7.5301055695 | 0.0060119604         | norC  | nitric oxide reductase, cytochrome c-containing subunit        |
| ABZ99033 | LEPBI_I2965 | 0.3859991941  | 7.8359906821 | 0.00038669           | NA    | hypothetical protein                                           |
| ABZ99036 | LEPBI_I2968 | -0.2918404045 | 8.8881838009 | 0.0063273264         | metK  | S-adenosylmethionine synthetase                                |
| ABZ99042 | LEPBI_I2974 | 0.3439846223  | 7.8599894352 | 0.0075791385         | NA    | hypothetical protein                                           |
| ABZ99080 | LEPBI_I3013 | -0.5009780884 | 7.7516830312 | 5.39648413695307e-06 | NA    | putative signal peptide                                        |
| ABZ99082 | LEPBI_I3016 | 0.497562669   | 6.3561509552 | 0.0004933729         | NA    | putative signal peptide                                        |
| ABZ99097 | LEPBI_I3031 | 0.3275935769  | 8.4673063242 | 0.0085907083         | NA    | hypothetical protein                                           |
| ABZ99102 | LEPBI_I3036 | -0.581771985  | 7.6173156127 | 0.0001074543         | NA    | TetR family transcriptional regulator                          |
| ABZ99108 | LEPBI_I3042 | 0.4793688088  | 5.8050937243 | 0.0078719432         | NA    | hypothetical protein                                           |
| ABZ99113 | LEPBI_I3047 | -0.6386250392 | 7.8808125827 | 4.59167732818632e-05 | NA    | hypothetical protein                                           |
| ABZ99132 | LEPBI_I3066 | 0.502904017   | 6.0060446784 | 0.0041375506         | chpK  | ChpK toxin protein                                             |
| ABZ99146 | LEPBI_I3080 | -0.4528137475 | 6.9508866925 | 0.0014356365         | NA    | putative anti-sigma factor antagonist                          |
| ABZ99147 | LEPBI_I3081 | -0.3929834669 | 8.2552117214 | 7.13577246186355e-05 | NA    | putative signal peptide                                        |
| ABZ99175 | LEPBI_I3109 | 0.3341191274  | 6.9561742253 | 0.0083520736         | NA    | putative signal peptide                                        |
| ABZ99179 | LEPBI_I3113 | -0.6534305388 | 6.6085493405 | 0.0002312015         | NA    | hypothetical protein                                           |
| ABZ99180 | LEPBI_I3114 | 0.4441292348  | 6.3476586234 | 0.0034878297         | NA    | hypothetical protein                                           |
| ABZ99183 | LEPBI_I3117 | -0.3601071878 | 8.5484961843 | 0.0030916352         | NA    | alcohol dehydrogenase                                          |
| ABZ99189 | LEPBI_I3123 | -0.4710992041 | 8.5388436413 | 5.2716106225958e-06  | NA    | hypothetical protein                                           |
| ABZ99191 | LEPBI_I3125 | -0.307103346  | 8.8070083216 | 0.0078348244         | NA    | putative sodium-dependent phosphate transport protein          |
| ABZ99192 | LEPBI_I3126 | -0.5017006556 | 7.5643481771 | 6.81772814359299e-05 | slyD  | FKBP-type peptidyl-prolyl cis-trans isomerase SlyD             |
| ABZ99205 | LEPBI_I3140 | -0.3095264325 | 7.8256161989 | 0.0040769112         | NA    | putative transporter                                           |
| ABZ99208 | LEPBI_I3143 | 0.5164718712  | 5.9707872587 | 0.0044696323         | NA    | hypothetical protein                                           |
| ABZ99212 | LEPBI_I3147 | -0.4600597689 | 7.2745539692 | 0.00313964           | NA    | TetR family transcriptional regulator                          |
| ABZ99213 | LEPBI_I3148 | -0.386798688  | 8.6843794526 | 0.0037962871         | NA    | hypothetical protein                                           |
| ABZ99214 | LEPBI_I3149 | -0.3945163535 | 8.1465944668 | 0.0053415299         | NA    | hypothetical protein                                           |
| ABZ99220 | LEPBI_I3155 | -0.3077638512 | 7.7653940295 | 0.0076199548         | NA    | putative regulatory protein                                    |
| ABZ99221 | LEPBI_I3156 | -0.4647238141 | 6.4033432053 | 0.0027988189         | NA    | putative phosphatase                                           |
| ABZ99225 | LEPBI_I3160 | -0.6000834864 | 8.7179847787 | 3.95956026315559e-08 | NA    | putative ABC transporter periplasmic phosphate-binding protein |
| ABZ99232 | LEPBI_I3167 | 0.7920196408  | 6.0192485143 | 1.14639148924868e-06 | NA    | hypothetical protein                                           |
| ABZ99242 | LEPBI_I3177 | -0.3276076597 | 8.2159367596 | 0.0078348244         | NA    | putative zinc-dependent hydrolase                              |
| ABZ99245 | LEPBI_I3180 | -0.6595467293 | 7.3641271994 | 0.003837256          | NA    | hypothetical protein                                           |
| ABZ99251 | LEPBI_I3186 | -2.3905096474 | 8.321380916  | 5.33627932066809e-17 | NA    | hypothetical protein                                           |
| ABZ99256 | LEPBI_I3191 | 0.4831846207  | 6.0504128859 | 0.0062752397         | NA    | putative ferredoxin-like protein, 2 Fe-2S                      |
| ABZ99265 | LEPBI_I3200 | -0.6423205611 | 8.6398336858 | 1.67372726416162e-05 | NA    | hypothetical protein                                           |
| ABZ99267 | LEPBI_I3202 | -0.5731242529 | 9.4600754297 | 0.0004192106         | NA    | putative serine protease                                       |
| ABZ99275 | LEPBI_I3210 | 0.6619599992  | 6.3532003318 | 1.47169150596246e-05 | csrA  | carbon storage regulator                                       |
| ABZ99283 | LEPBI_I3218 | 0.5053279091  | 6.4514488171 | 0.0008838864         | NA    | hypothetical protein                                           |
| ABZ99287 | LEPBI_I3222 | -0.4453244901 | 7.8164583803 | 7.03565623348734e-05 | NA    | hypothetical protein                                           |
| ABZ99304 | LEPBI_I3239 | -0.4315182461 | 8.9123119656 | 0.0002119257         | sull  | dihydropteroate synthase                                       |
| ABZ99309 | LEPBI_I3244 | -0.2614684804 | 8.297660639  | 0.0079745287         | NA    | putative chemotaxis sensory transducer                         |
| ABZ99317 | LEPBI_I3252 | -0.3830601933 | 7.6785092392 | 0.0022432391         | NA    | hypothetical protein                                           |
| ABZ99320 | LEPBI_I3255 | -0.5367322078 | 8.0469198411 | 1.46770287451628e-05 | NA    | SDR family dehydrogenase/reductase                             |
| ABZ99356 | LEPBI_I3291 | -0.4066203736 | 8.4689379787 | 0.0006961692         | NA    | putative signal peptide                                        |
| ABZ99370 | LEPBI_I3305 | 0.3757418823  | 7.5003742532 | 0.0037552689         | NA    | putative phosphoribosyl-AMP cyclohydrolase                     |
| ABZ99389 | LEPBI_I3324 | -0.4943854761 | 7.7358589513 | 0.0003715785         | NA    | hypothetical protein                                           |
| ABZ99393 | LEPBI_I3328 | -0.3256882509 | 8.1667560363 | 0.0084425627         | NA    | reductase                                                      |
| ABZ99418 | LEPBI_I3354 | -0.3071143335 | 9.6133302368 | 0.0054761668         | NA    | putative porin                                                 |
| ABZ99419 | LEPBI_I3355 | 0.6156082165  | 6.395006823  | 2.21737265420913e-05 | NA    | TetR family transcriptional regulator                          |
| ABZ99427 | LEPBI_I3363 | -0.3674767713 | 7.5181215828 | 0.0010368343         | NA    | hypothetical protein                                           |
| ABZ99432 | LEPBI_I3368 | 0.5462408087  | 7.1475286481 | 1.47169150596246e-05 | NA    | ArsC family arsenate permease                                  |
| ABZ99439 | LEPBI_I3375 | 0.5072570958  | 6.6522904779 | 0.0033287725         | NA    | hypothetical protein                                           |

## P\_120vs48

|          |              |               |               |                      |      |                                                                                        |
|----------|--------------|---------------|---------------|----------------------|------|----------------------------------------------------------------------------------------|
| ABZ99474 | LEPBI_I3412  | -0.524678622  | 7.8221326514  | 7.88930375617459e-05 | aroD | 3-dehydroquinate dehydratase                                                           |
| ABZ99477 | LEPBI_I3415  | 0.4272199157  | 7.6834640598  | 0.0027955313         | NA   | hypothetical protein                                                                   |
| ABZ99488 | LEPBI_I3427  | 0.3653940156  | 6.9426988771  | 0.0074860312         | NA   | hypothetical protein                                                                   |
| ABZ99494 | LEPBI_I3433  | -0.3083755555 | 8.2885852945  | 0.0094090969         | NA   | putative signal peptide                                                                |
| ABZ99498 | LEPBI_I3437  | -0.5906024682 | 6.0357831416  | 0.0029018755         | NA   | putative transcriptional coactivator                                                   |
| ABZ99511 | LEPBI_I3451  | -0.497805918  | 7.454628202   | 4.1487307279546e-05  | foIE | GTP cyclohydrolase I                                                                   |
| ABZ99517 | LEPBI_I3457  | 0.4971530949  | 6.1786598488  | 0.0030271736         | NA   | hypothetical protein                                                                   |
| ABZ99522 | LEPBI_I3463  | -0.4023969219 | 7.7134058701  | 0.0015221775         | recR | recombination protein RecR                                                             |
| ABZ99544 | LEPBI_II0006 | 0.4030810285  | 6.9121799072  | 0.0041824537         | NA   | hypothetical protein                                                                   |
| ABZ99550 | LEPBI_II0012 | -0.5256615627 | 7.9400143985  | 3.18446572337306e-08 | batA | von Willebrand factor A                                                                |
| ABZ99560 | LEPBI_II0022 | -0.495454881  | 6.7068700112  | 0.0031679065         | NA   | phosphotyrosine protein phosphatase                                                    |
| ABZ99568 | LEPBI_II0030 | -0.6126220562 | 6.6348012584  | 2.28675073165793e-05 | NA   | cyclic nucleotide binding protein                                                      |
| ABZ99573 | LEPBI_II0035 | -0.5822124063 | 8.5963102811  | 8.65174721543477e-09 | NA   | hypothetical protein                                                                   |
| ABZ99582 | LEPBI_II0044 | -0.2860242403 | 9.40464043    | 0.0093508287         | mcm2 | methylmalonyl-CoA mutase                                                               |
| ABZ99593 | LEPBI_II0055 | -0.5322496205 | 6.6825737446  | 0.0012737515         | NA   | hypothetical protein                                                                   |
| ABZ99599 | LEPBI_II0061 | -0.4681007719 | 6.9737258184  | 0.0001890673         | NA   | cytochrome c oxidase, subunit III                                                      |
| ABZ99601 | LEPBI_II0063 | -0.3301895973 | 7.7706318876  | 0.0059233791         | NA   | cbb3-type cytochrome c oxidase subunit II                                              |
| ABZ99602 | LEPBI_II0064 | -0.3472995214 | 8.2613831628  | 0.0001627265         | NA   | cbb3-type cytochrome c oxidase subunit I                                               |
| ABZ99603 | LEPBI_II0065 | -0.6067055591 | 8.6800882416  | 5.67884977075303e-07 | NA   | hypothetical protein                                                                   |
| ABZ99604 | LEPBI_II0066 | -0.3975334984 | 8.1115591169  | 2.63818314094038e-05 | gltD | glutamate synthase (NADPH)                                                             |
| ABZ99613 | LEPBI_II0075 | -0.4618579942 | 8.4737579511  | 5.9138814328589e-06  | traB | Pheromone shutdown protein, TraB family                                                |
| ABZ99615 | LEPBI_II0077 | -0.6236831867 | 5.60107023    | 0.0047357694         | NA   | hypothetical protein                                                                   |
| ABZ99622 | LEPBI_II0084 | -0.5239334984 | 8.7802207034  | 0.0004289153         | NA   | MotA/TolQ/ExbB proton channel protein                                                  |
| ABZ99623 | LEPBI_II0085 | -0.3902295978 | 8.7527155181  | 5.0770304536292e-05  | NA   | hypothetical protein                                                                   |
| ABZ99624 | LEPBI_II0087 | -0.3282668823 | 10.0395416751 | 0.0059233791         | NA   | acriflavine resistance protein D; transmembrane protein                                |
| ABZ99625 | LEPBI_II0088 | -0.6596894707 | 7.0127542183  | 2.09345418977814e-06 | NA   | hypothetical protein                                                                   |
| ABZ99633 | LEPBI_II0097 | -0.3998600261 | 7.4584614146  | 0.0036323262         | NA   | hypothetical protein                                                                   |
| ABZ99637 | LEPBI_II0101 | -0.4586244252 | 8.1163761914  | 6.63980426755572e-06 | NA   | hypothetical protein                                                                   |
| ABZ99645 | LEPBI_II0109 | -0.3182386372 | 8.2869700547  | 0.0014242442         | NA   | hypothetical protein                                                                   |
| ABZ99647 | LEPBI_II0111 | -0.3921339071 | 8.3859053142  | 0.0001904381         | NA   | dehydrogenase                                                                          |
| ABZ99651 | LEPBI_II0115 | -0.6393611981 | 6.7043406027  | 0.0020704346         | NA   | hypothetical protein                                                                   |
| ABZ99673 | LEPBI_II0138 | -0.4953906574 | 8.2848587832  | 2.21737265420913e-05 | NA   | hypothetical protein                                                                   |
| ABZ99679 | LEPBI_II0144 | -0.2731431162 | 8.5706823292  | 0.0091809359         | NA   | soluble pyridine nucleotide transhydrogenase (NAD(P)(+) transhydrogenase [B-specific]) |
| ABZ99681 | LEPBI_II0146 | -0.7933640561 | 8.5248328123  | 2.07212907270661e-16 | NA   | peroxidase                                                                             |
| ABZ99683 | LEPBI_II0148 | -0.451824148  | 7.7275686846  | 0.0002306847         | NA   | hypothetical protein                                                                   |
| ABZ99684 | LEPBI_II0149 | -0.5187824377 | 7.8067718605  | 5.9138814328589e-06  | NA   | hypothetical protein                                                                   |
| ABZ99691 | LEPBI_II0156 | -0.4787982371 | 8.6263575031  | 1.03980411703154e-06 | NA   | signal peptide                                                                         |
| ABZ99693 | LEPBI_II0158 | -0.5407955954 | 6.766522291   | 0.0001901054         | NA   | photoactive yellow protein (PYP)                                                       |
| ABZ99695 | LEPBI_II0160 | -0.4037420177 | 8.2308799345  | 2.37232924453697e-05 | NA   | hypothetical protein                                                                   |
| ABZ99698 | LEPBI_II0163 | -0.6982400571 | 7.6268817081  | 1.3875131698766e-10  | NA   | DnaK suppressor; DksA/TraR zinc finger signature                                       |
| ABZ99703 | LEPBI_II0168 | -0.3811547346 | 7.2301877943  | 0.0020618473         | NA   | hypothetical protein                                                                   |
| ABZ99706 | LEPBI_II0171 | -0.3957840424 | 9.4449306993  | 0.0006597777         | NA   | Sigma factor SigB regulation protein RsbU; phosphoserine phosphatase                   |
| ABZ99709 | LEPBI_II0174 | -0.4194746953 | 7.8848817763  | 7.88930375617459e-05 | NA   | hypothetical protein                                                                   |
| ABZ99718 | LEPBI_II0185 | -0.3793429208 | 7.8476321753  | 0.0029574608         | ahcY | S-adenosyl-L-homocysteine hydrolase                                                    |
| ABZ99722 | LEPBI_II0189 | -0.3366382023 | 7.7926973938  | 0.0048733419         | NA   | drug/metabolite exporter                                                               |
| ABZ99724 | LEPBI_II0191 | -1.0302617324 | 7.0065893202  | 1.25118517101645e-10 | NA   | hypothetical protein                                                                   |
| ABZ99731 | LEPBI_II0198 | -0.4083910915 | 8.1119952872  | 2.44820576721478e-05 | NA   | short-chain dehydrogenase/reductase SDR                                                |
| ABZ99734 | LEPBI_II0201 | -0.4092870163 | 6.9973324342  | 0.0019685283         | efp  | elongation factor P                                                                    |
| ABZ99742 | LEPBI_II0209 | -0.3715004534 | 8.2018907443  | 0.001006871          | NA   | cyclopropane-fatty-acyl-phospholipid synthase                                          |
| ABZ99748 | LEPBI_II0215 | -1.1453543089 | 6.8462999763  | 3.95956026315559e-08 | NA   | hypothetical protein                                                                   |
| ABZ99755 | LEPBI_II0222 | -0.6783968681 | 5.0883275166  | 0.0018960495         | NA   | hypothetical protein                                                                   |
| ABZ99773 | LEPBI_II0240 | -1.0185975536 | 5.8480491694  | 5.16472789388073e-10 | NA   | hypothetical protein                                                                   |
| ABZ99781 | LEPBI_II0248 | -0.3825806953 | 8.498409416   | 0.0013619918         | NA   | hypothetical protein                                                                   |

## P\_120vs48

|          |              |               |              |                      |      |                      |
|----------|--------------|---------------|--------------|----------------------|------|----------------------|
| ABZ99795 | LEPBI_II0262 | -0.4105201475 | 9.1438382331 | 2.37232924453697e-05 | NA   | hypothetical protein |
| ABZ99806 | LEPBI_II0273 | -0.403302027  | 8.6301660693 | 0.0004257111         | pykF | pyruvate kinase      |
| ABZ99811 | LEPBI_II0278 | -0.8262439029 | 4.6417818559 | 0.0048981636         | NA   | hypothetical protein |

---
