# Supplementary material for: Transcriptome Sequencing Reveals Wide Expression Reprogramming of Basal and Unknown Genes in Leptospira biflexa Biofilms
Source: PubMed Central journal article supplement (PMC4863578; doi:10.1128/msphere.00042-16), 2016-04-06
Supplement: sph002162059st8.pdf [file sph002162059st8.pdf]

Table S6

**Table S6.** Expression of predicted sRNAs.

| Chromosome | Start   | End     | Length | Strand | Description                              | Identification method | Active | Differentially expressed (logFC) |          |           |           |
|------------|---------|---------|--------|--------|------------------------------------------|-----------------------|--------|----------------------------------|----------|-----------|-----------|
|            |         |         |        |        |                                          |                       |        | BvsP_48                          | BvsP_120 | B_120vs48 | P_120vs48 |
| chrl       | 2043554 | 2043715 | 162    | -      | Lysine                                   | Darn                  | No     | -                                | -        | -         | -         |
| chrl       | 2806361 | 2806534 | 174    | +      | Lysine                                   | Darn                  | No     | -                                | -        | -         | -         |
| chrl       | 246415  | 246456  | 42     | -      | SAM                                      | Darn                  | No     | -                                | -        | -         | -         |
| chrl       | 648107  | 648163  | 57     | -      | RtT                                      | YASS/Rfam_10.0_seed   | No     | -                                | -        | -         | -         |
| chrl       | 2380114 | 2380168 | 55     | -      | RtT                                      | YASS/Rfam_10.0_seed   | No     | -                                | -        | -         | -         |
| chrl       | 2468926 | 2469054 | 129    | -      | LR-PK1                                   | YASS/Rfam_10.0_seed   | No     | -                                | -        | -         | -         |
| chrl       | 414383  | 414453  | 71     | +      | CAESAR                                   | INFERNAL              | Yes    | -                                | -        | -         | -         |
| chrl       | 796163  | 796191  | 29     | +      | RprA                                     | ERPIN                 | Yes    | -                                | -        | -         | -         |
| chrl       | 877669  | 877699  | 31     | -      | RprA                                     | ERPIN                 | Yes    | -                                | -0,70    | -         | 1,3       |
| chrl       | 3473660 | 3473689 | 30     | -      | RprA                                     | ERPIN                 | Yes    | -                                | -        | -         | -         |
| chrl       | 906252  | 906279  | 28     | -      | SraE/RygA/RygB_family                    | ERPIN                 | No     | -                                | -        | -         | -         |
| chrl       | 1628886 | 1628914 | 29     | -      | SraE/RygA/RygB_family                    | ERPIN                 | No     | -                                | -        | -         | -         |
| chrl       | 2559248 | 2559275 | 28     | -      | RyeE                                     | ERPIN                 | Yes    | -                                | -        | -         | -         |
| chrl       | 343749  | 343817  | 69     | -      | SL2                                      | ERPIN                 | No     | -                                | -        | -         | -         |
| chrl       | 1155497 | 1155531 | 35     | -      | Threonine_operon_leader                  | ERPIN                 | Yes    | -                                | -        | -         | -         |
| chrl       | 906256  | 906281  | 26     | +      | Leucine_operon_leader                    | ERPIN                 | No     | -                                | -        | -         | -         |
| chrl       | 2407469 | 2407494 | 26     | +      | Leucine_operon_leader                    | ERPIN                 | Yes    | -                                | -        | -         | -         |
| chrl       | 906256  | 906281  | 26     | -      | Leucine_operon_leader                    | ERPIN                 | No     | -                                | -        | -         | -         |
| chrl       | 2407469 | 2407494 | 26     | -      | Leucine_operon_leader                    | ERPIN                 | No     | -                                | -        | -         | -         |
| chrl       | 2778262 | 2778283 | 22     | +      | Pseudomonas_sRNA_P9                      | ERPIN                 | No     | -                                | -        | -         | -         |
| chrl       | 3297300 | 3297322 | 23     | +      | Pseudomonas_sRNA_P9                      | ERPIN                 | No     | -                                | -        | -         | -         |
| chrl       | 429033  | 429133  | 101    | +      | GEMM_cis-regulatory_element              | ERPIN                 | No     | -                                | -        | -         | -         |
| chrl       | 2620243 | 2620310 | 68     | -      | Pseudoknot_of_the_domain_G(G12)_of_23S_r | ERPIN                 | No     | -                                | -        | -         | -         |
| chrl       | 2922549 | 2922616 | 68     | -      | Pseudoknot_of_the_domain_G(G12)_of_23S_r | ERPIN                 | No     | -                                | -        | -         | -         |
| chrl       | 2429451 | 2429479 | 29     | +      | CRISPR_RNA_direct_repeat_element         | ERPIN                 | No     | -                                | -        | -         | -         |
| chrl       | 3427282 | 3427302 | 21     | +      | CRISPR_RNA_direct_repeat_element         | ERPIN                 | No     | -                                | -        | -         | -         |
| chrl       | 355359  | 355369  | 11     | +      | CRISPR_RNA_direct_repeat_element         | ERPIN                 | No     | -                                | -        | -         | -         |
| chrl       | 809310  | 809320  | 11     | +      | CRISPR_RNA_direct_repeat_element         | ERPIN                 | No     | -                                | -        | -         | -         |
| chrl       | 1302840 | 1302850 | 11     | +      | CRISPR_RNA_direct_repeat_element         | ERPIN                 | No     | -                                | -        | -         | -         |
| chrl       | 1542856 | 1542866 | 11     | +      | CRISPR_RNA_direct_repeat_element         | ERPIN                 | No     | -                                | -        | -         | -         |
| chrl       | 1913303 | 1913313 | 11     | +      | CRISPR_RNA_direct_repeat_element         | ERPIN                 | No     | -                                | -        | -         | -         |

Table S6

|      |         |         |     |   |                                  |          |     |   |   |       |   |
|------|---------|---------|-----|---|----------------------------------|----------|-----|---|---|-------|---|
| chrI | 3418241 | 3418251 | 11  | + | CRISPR_RNA_direct_repeat_element | ERPIN    | No  | - | - | -     | - |
| chrI | 60811   | 60821   | 11  | - | CRISPR_RNA_direct_repeat_element | ERPIN    | No  | - | - | -     | - |
| chrI | 702167  | 702177  | 11  | - | CRISPR_RNA_direct_repeat_element | ERPIN    | No  | - | - | -     | - |
| chrI | 1100592 | 1100602 | 11  | - | CRISPR_RNA_direct_repeat_element | ERPIN    | No  | - | - | -     | - |
| chrI | 1654039 | 1654049 | 11  | - | CRISPR_RNA_direct_repeat_element | ERPIN    | No  | - | - | -     | - |
| chrI | 3078358 | 3078368 | 11  | - | CRISPR_RNA_direct_repeat_element | ERPIN    | No  | - | - | -     | - |
| chrI | 3199865 | 3199875 | 11  | - | CRISPR_RNA_direct_repeat_element | ERPIN    | No  | - | - | -     | - |
| chrI | 3456144 | 3456154 | 11  | - | CRISPR_RNA_direct_repeat_element | ERPIN    | No  | - | - | -     | - |
| chrI | 3534691 | 3534701 | 11  | - | CRISPR_RNA_direct_repeat_element | ERPIN    | No  | - | - | -     | - |
| chrI | 3590602 | 3590612 | 11  | - | CRISPR_RNA_direct_repeat_element | ERPIN    | No  | - | - | -     | - |
| chrI | 1500802 | 1500827 | 26  | - | isrJ_Hfq_binding                 | ERPIN    | No  | - | - | -     | - |
| chrI | 1690756 | 1690786 | 31  | + | Deinococcus_Y_RNA                | INFERNAL | No  | - | - | -     | - |
| chrI | 2637082 | 2637128 | 47  | + | EAV_LTH                          | INFERNAL | No  | - | - | -     | - |
| chrI | 1479823 | 1479891 | 69  | - | FinP                             | INFERNAL | Yes | - | - | -     | - |
| chrI | 1302364 | 1302469 | 106 | + | GRIK4_3p_UTR                     | INFERNAL | No  | - | - | -     | - |
| chrI | 261127  | 261199  | 73  | - | Gurken                           | INFERNAL | No  | - | - | -     | - |
| chrI | 808656  | 808703  | 48  | - | Hairpin                          | INFERNAL | No  | - | - | -     | - |
| chrI | 2640802 | 2640828 | 27  | + | IRE                              | INFERNAL | No  | - | - | -     | - |
| chrI | 106391  | 106435  | 45  | + | K10_TLS                          | INFERNAL | No  | - | - | -     | - |
| chrI | 270271  | 270311  | 41  | + | K10_TLS                          | INFERNAL | No  | - | - | -     | - |
| chrI | 635829  | 635873  | 45  | - | K10_TLS                          | INFERNAL | No  | - | - | -     | - |
| chrI | 2342917 | 2342938 | 22  | + | PSLVbeta_UPD-PK2                 | INFERNAL | No  | - | - | -     | - |
| chrI | 2673819 | 2673840 | 22  | + | PSLVbeta_UPD-PK2                 | INFERNAL | No  | - | - | -     | - |
| chrI | 3241758 | 3241875 | 118 | + | PyrR                             | INFERNAL | No  | - | - | -     | - |
| chrI | 2775835 | 2775965 | 131 | + | PyrR                             | INFERNAL | No  | - | - | -     | - |
| chrI | 1313428 | 1313543 | 116 | + | PyrR                             | INFERNAL | Yes | - | - | -0,44 | - |
| chrI | 2766380 | 2766474 | 95  | - | PyrR                             | INFERNAL | No  | - | - | -     | - |
| chrI | 2167599 | 2167685 | 87  | - | RtT                              | INFERNAL | No  | - | - | -     | - |
| chrI | 1445873 | 1445964 | 92  | - | RtT                              | INFERNAL | No  | - | - | -     | - |
| chrI | 2822907 | 2822950 | 44  | + | S-element                        | INFERNAL | No  | - | - | -     | - |
| chrI | 252065  | 252124  | 60  | - | S-element                        | INFERNAL | Yes | - | - | -     | - |
| chrI | 1658079 | 1658175 | 97  | - | S15                              | INFERNAL | No  | - | - | -     | - |
| chrI | 2384773 | 2384794 | 22  | - | SBRMV1_UPD-PKd                   | INFERNAL | No  | - | - | -     | - |
| chrI | 1850854 | 1850921 | 68  | - | SECIS                            | INFERNAL | Yes | - | - | -     | - |
| chrI | 1870392 | 1870470 | 79  | - | SNORA55                          | INFERNAL | No  | - | - | -     | - |

Table S6

|      |         |         |     |   |                |          |     |   |   |   |   |
|------|---------|---------|-----|---|----------------|----------|-----|---|---|---|---|
| chr1 | 1334839 | 1334907 | 69  | + | SNORD15        | INFERNAL | No  | - | - | - | - |
| chr1 | 957439  | 957526  | 88  | - | SNORD21        | INFERNAL | No  | - | - | - | - |
| chr1 | 2399635 | 2399723 | 89  | - | SNORD34        | INFERNAL | No  | - | - | - | - |
| chr1 | 2760326 | 2760398 | 73  | - | SNORD59        | INFERNAL | No  | - | - | - | - |
| chr1 | 79478   | 79550   | 73  | - | SNORD59        | INFERNAL | No  | - | - | - | - |
| chr1 | 1397574 | 1397618 | 45  | + | SNORD70        | INFERNAL | No  | - | - | - | - |
| chr1 | 2682080 | 2682156 | 77  | + | SNORD70        | INFERNAL | No  | - | - | - | - |
| chr1 | 2941931 | 2941996 | 66  | + | SNORD70        | INFERNAL | No  | - | - | - | - |
| chr1 | 588261  | 588310  | 50  | - | SNORD70        | INFERNAL | No  | - | - | - | - |
| chr1 | 2273136 | 2273213 | 78  | - | SNORD70        | INFERNAL | No  | - | - | - | - |
| chr1 | 229033  | 229132  | 100 | + | SNORD86        | INFERNAL | No  | - | - | - | - |
| chr1 | 1864077 | 1864141 | 65  | + | SNORD98        | INFERNAL | No  | - | - | - | - |
| chr1 | 336293  | 336428  | 136 | + | Telomerase-cil | INFERNAL | No  | - | - | - | - |
| chr1 | 1176691 | 1176823 | 133 | - | Telomerase-cil | INFERNAL | No  | - | - | - | - |
| chr1 | 1201358 | 1201378 | 21  | - | UPD-PKg        | INFERNAL | No  | - | - | - | - |
| chr1 | 1221813 | 1221905 | 93  | + | bantam         | INFERNAL | No  | - | - | - | - |
| chr1 | 2479052 | 2479120 | 69  | - | ctRNA_pGA1     | INFERNAL | No  | - | - | - | - |
| chr1 | 2766386 | 2766450 | 65  | + | ctRNA_pND324   | INFERNAL | No  | - | - | - | - |
| chr1 | 1433265 | 1433350 | 86  | - | ctRNA_pND324   | INFERNAL | Yes | - | - | - | - |
| chr1 | 3241798 | 3241883 | 86  | + | ctRNA_pT181    | INFERNAL | No  | - | - | - | - |
| chr1 | 906249  | 906321  | 73  | + | ctRNA_pT181    | INFERNAL | No  | - | - | - | - |
| chr1 | 1965107 | 1965175 | 69  | + | ctRNA_pT181    | INFERNAL | Yes | - | - | - | - |
| chr1 | 2988832 | 2988905 | 74  | + | ctRNA_pT181    | INFERNAL | No  | - | - | - | - |
| chr1 | 982021  | 982108  | 88  | + | ctRNA_pT181    | INFERNAL | No  | - | - | - | - |
| chr1 | 805787  | 805877  | 91  | + | ctRNA_pT181    | INFERNAL | No  | - | - | - | - |
| chr1 | 1512817 | 1512906 | 90  | - | ctRNA_pT181    | INFERNAL | Yes | - | - | - | - |
| chr1 | 2581761 | 2581847 | 87  | - | ctRNA_pT181    | INFERNAL | No  | - | - | - | - |
| chr1 | 551851  | 551953  | 103 | - | ctRNA_pT181    | INFERNAL | No  | - | - | - | - |
| chr1 | 3324073 | 3324132 | 60  | + | nos_TCE        | INFERNAL | No  | - | - | - | - |
| chr1 | 2465099 | 2465153 | 55  | + | sR11           | INFERNAL | No  | - | - | - | - |
| chr1 | 1495918 | 1495968 | 51  | + | sR11           | INFERNAL | No  | - | - | - | - |
| chr1 | 398673  | 398733  | 61  | + | sR15           | INFERNAL | No  | - | - | - | - |
| chr1 | 3394232 | 3394298 | 67  | + | sR15           | INFERNAL | No  | - | - | - | - |
| chr1 | 1708862 | 1708926 | 65  | + | sR15           | INFERNAL | No  | - | - | - | - |
| chr1 | 2953642 | 2953699 | 58  | + | sR2            | INFERNAL | No  | - | - | - | - |

Table S6

|      |         |         |     |   |                |          |     |   |   |       |   |
|------|---------|---------|-----|---|----------------|----------|-----|---|---|-------|---|
| chr1 | 1309456 | 1309505 | 50  | + | sR2            | INFERNAL | No  | - | - | -     | - |
| chr1 | 63511   | 63573   | 63  | + | sR21           | INFERNAL | No  | - | - | -     | - |
| chr1 | 270442  | 270497  | 56  | + | sR33           | INFERNAL | Yes | - | - | -     | - |
| chr1 | 1533334 | 1533388 | 55  | - | sR48           | INFERNAL | No  | - | - | -     | - |
| chr1 | 1556386 | 1556456 | 71  | - | sn2841         | INFERNAL | No  | - | - | -     | - |
| chr1 | 2398082 | 2398209 | 128 | + | snR13          | INFERNAL | No  | - | - | -     | - |
| chr1 | 1237121 | 1237215 | 95  | + | snR58          | INFERNAL | Yes | - | - | -     | - |
| chr1 | 1239485 | 1239573 | 89  | + | snR62          | INFERNAL | No  | - | - | -     | - |
| chr1 | 2482774 | 2482842 | 69  | + | snR62          | INFERNAL | No  | - | - | -     | - |
| chr1 | 174215  | 174355  | 141 | - | snoJ26         | INFERNAL | No  | - | - | -     | - |
| chr1 | 187992  | 188057  | 66  | - | snoJ26         | INFERNAL | No  | - | - | -     | - |
| chr1 | 801325  | 801413  | 89  | + | snoM1          | INFERNAL | Yes | - | - | -     | - |
| chr1 | 752727  | 752774  | 48  | - | snoMe28S-Am982 | INFERNAL | No  | - | - | -     | - |
| chr1 | 3470065 | 3470145 | 81  | + | snoR11         | INFERNAL | Yes | - | - | 1,63  | - |
| chr1 | 145230  | 145314  | 85  | - | snoR11         | INFERNAL | No  | - | - | -     | - |
| chr1 | 1709892 | 1709965 | 74  | + | snoR12         | INFERNAL | No  | - | - | -     | - |
| chr1 | 2561073 | 2561149 | 77  | - | snoR160        | INFERNAL | No  | - | - | -     | - |
| chr1 | 413407  | 413472  | 66  | - | snoR28         | INFERNAL | No  | - | - | -     | - |
| chr1 | 479500  | 479591  | 92  | + | snoR30         | INFERNAL | No  | - | - | -     | - |
| chr1 | 332258  | 332294  | 37  | - | snoR31         | INFERNAL | No  | - | - | -     | - |
| chr1 | 2656210 | 2656306 | 97  | - | snoR31         | INFERNAL | No  | - | - | -     | - |
| chr1 | 218105  | 218191  | 87  | - | snoR43         | INFERNAL | No  | - | - | -     | - |
| chr1 | 2839461 | 2839507 | 47  | - | snoR4a         | INFERNAL | No  | - | - | -     | - |
| chr1 | 2783973 | 2784014 | 42  | + | snoR53Y        | INFERNAL | No  | - | - | -     | - |
| chr1 | 1003769 | 1003806 | 38  | + | snoR53Y        | INFERNAL | Yes | - | - | -     | - |
| chr1 | 1831833 | 1831900 | 68  | + | snoR53Y        | INFERNAL | No  | - | - | -     | - |
| chr1 | 469141  | 469207  | 67  | - | snoR53Y        | INFERNAL | No  | - | - | -     | - |
| chr1 | 365016  | 365081  | 66  | + | snoR64a        | INFERNAL | No  | - | - | -     | - |
| chr1 | 2895532 | 2895594 | 63  | + | snoR72         | INFERNAL | No  | - | - | -     | - |
| chr1 | 707984  | 708037  | 54  | + | snoR72         | INFERNAL | No  | - | - | -     | - |
| chr1 | 427418  | 427513  | 96  | + | snoR98         | INFERNAL | Yes | - | - | -1,29 | - |
| chr1 | 2991310 | 2991387 | 78  | - | snoR99         | INFERNAL | No  | - | - | -     | - |
| chr1 | 121064  | 121120  | 57  | - | snoU35         | INFERNAL | No  | - | - | -     | - |
| chr1 | 377715  | 377779  | 65  | - | snoU43C        | INFERNAL | No  | - | - | -     | - |
| chr1 | 1180607 | 1180686 | 80  | - | snoU83D        | INFERNAL | No  | - | - | -     | - |

Table S6

|       |         |         |     |   |                                  |                                                                |     |   |   |       |   |
|-------|---------|---------|-----|---|----------------------------------|----------------------------------------------------------------|-----|---|---|-------|---|
| chrI  | 1616861 | 1616909 | 49  | + | snoZ118                          | INFERNAL                                                       | No  | - | - | -     | - |
| chrI  | 575330  | 575431  | 102 | - | snoZ118                          | INFERNAL                                                       | No  | - | - | -     | - |
| chrI  | 608866  | 608946  | 81  | - | snoZ122                          | INFERNAL                                                       | No  | - | - | -     | - |
| chrI  | 3168029 | 3168092 | 64  | + | snoZ13_snr52                     | INFERNAL                                                       | No  | - | - | -     | - |
| chrI  | 2409314 | 2409373 | 60  | + | snoZ13_snr52                     | INFERNAL                                                       | Yes | - | - | -0,95 | - |
| chrI  | 60462   | 60556   | 95  | - | snoZ13_snr52                     | INFERNAL                                                       | No  | - | - | -     | - |
| chrI  | 30984   | 31055   | 72  | - | snoZ155                          | INFERNAL                                                       | No  | - | - | -     | - |
| chrI  | 705749  | 705803  | 55  | - | snoZ159                          | INFERNAL                                                       | No  | - | - | -     | - |
| chrI  | 3041968 | 3042044 | 77  | - | snoZ159                          | INFERNAL                                                       | No  | - | - | -     | - |
| chrI  | 3056776 | 3056852 | 77  | + | snoZ165                          | INFERNAL                                                       | No  | - | - | -     | - |
| chrI  | 1915576 | 1915656 | 81  | - | snoZ168                          | INFERNAL                                                       | No  | - | - | -     | - |
| chrI  | 2759895 | 2759935 | 41  | + | snoZ169                          | INFERNAL                                                       | No  | - | - | -     | - |
| chrI  | 2564043 | 2564092 | 50  | + | snoZ175                          | INFERNAL                                                       | No  | - | - | -     | - |
| chrI  | 2014686 | 2014726 | 41  | - | snoZ175                          | INFERNAL                                                       | No  | - | - | -     | - |
| chrI  | 3438373 | 3438459 | 87  | + | snoZ182                          | INFERNAL                                                       | No  | - | - | -     | - |
| chrI  | 350208  | 350281  | 74  | + | snoZ196                          | INFERNAL                                                       | No  | - | - | -     | - |
| chrI  | 635480  | 635529  | 50  | - | snoZ196                          | INFERNAL                                                       | No  | - | - | -     | - |
| chrI  | 841244  | 841333  | 90  | + | snoZ223                          | INFERNAL                                                       | No  | - | - | -     | - |
| chrI  | 1668509 | 1668570 | 62  | + | snoZ223                          | INFERNAL                                                       | No  | - | - | -     | - |
| chrI  | 2768448 | 2768530 | 83  | - | snoZ223                          | INFERNAL                                                       | No  | - | - | -     | - |
| chrI  | 1445310 | 1445399 | 90  | - | snoZ247                          | INFERNAL                                                       | No  | - | - | -     | - |
| chrI  | 729296  | 729411  | 116 | - | snoZ5                            | INFERNAL                                                       | No  | - | - | -     | - |
| chrI  | 1520269 | 1520323 | 55  | + | snoZ7                            | INFERNAL                                                       | No  | - | - | -     | - |
| chrI  | 3347127 | 3347200 | 74  | + | suhB                             | INFERNAL                                                       | Yes | - | - | -     | - |
| chrI  | 3220259 | 3220347 | 89  | - | suhB                             | INFERNAL                                                       | Yes | - | - | -     | - |
| chrI  | 2963232 | 2963335 | 104 | - | sxy                              | INFERNAL                                                       | No  | - | - | -     | - |
| chrI  | 3585895 | 3585994 | 100 | - | sxy                              | INFERNAL                                                       | Yes | - | - | -     | - |
| chrI  | 2373341 | 2373453 | 113 | - | TPP                              | combine:BLAST/Rfam_10.0_seed+INFERNAL+YASS/Rfam_10.0_seed      | No  | - | - | -     | - |
| chrI  | 1761250 | 1761315 | 66  | + | RtT                              | combine:BLAST/Rfam_10.0_seed+YASS/Rfam_10.0_seed               | No  | - | - | -     | - |
| chrI  | 1222604 | 1222952 | 349 | + | RNaseP                           | combine:BLAST/Rfam_10.0_seed+Darn+INFERNAL+YASS/Rfam_10.0_seed | Yes | - | - | -     | - |
| chrI  | 132665  | 133015  | 351 | - | tmRNA                            | combine:INFERNAL+YASS/Rfam_10.0_seed                           | No  | - | - | -     | - |
| chrI  | 2620243 | 2620351 | 109 | - | PK-G12rRNA                       | combine:BLAST/Rfam_10.0_seed+YASS/Rfam_10.0_seed               | No  | - | - | -     | - |
| chrI  | 2922549 | 2922657 | 109 | - | PK-G12rRNA                       | combine:BLAST/Rfam_10.0_seed+YASS/Rfam_10.0_seed               | No  | - | - | -     | - |
| chrII | 101839  | 101849  | 11  | + | CRISPR_RNA_direct_repeat_element | ERPIN                                                          | No  | - | - | -     | - |
| chrII | 114356  | 114366  | 11  | + | CRISPR_RNA_direct_repeat_element | ERPIN                                                          | No  | - | - | -     | - |

Table S6

|       |        |        |    |   |                |          |     |       |      |      |       |
|-------|--------|--------|----|---|----------------|----------|-----|-------|------|------|-------|
| chrII | 73622  | 73695  | 74 | + | GRIK4_3p_UTR   | INFERNAL | No  | -     | -    | -    | -     |
| chrII | 274101 | 274193 | 93 | + | SL1            | INFERNAL | Yes | -0,44 | 0,58 | 0,43 | -0,58 |
| chrII | 47848  | 47910  | 63 | - | SNORD37        | INFERNAL | No  | -     | -    | -    | -     |
| chrII | 10667  | 10765  | 99 | + | Telomerase-cil | INFERNAL | No  | -     | -    | -    | -     |
| chrII | 102287 | 102318 | 32 | - | UPD-PKib       | INFERNAL | Yes | -     | -    | -    | -     |
| chrII | 179514 | 179599 | 86 | + | snoZ102_R77    | INFERNAL | Yes | -     | -    | -    | -     |
| chrII | 139385 | 139459 | 75 | + | snoZ155        | INFERNAL | Yes | -     | -    | -    | -     |
| chrII | 220582 | 220642 | 61 | - | sxy            | INFERNAL | Yes | -     | -    | -    | -     |
| p74   | 23574  | 23672  | 99 | - | snoJ26         | INFERNAL | No  | -     | -    | -    | -     |
| p74   | 57812  | 57872  | 61 | - | snoR53Y        | INFERNAL | No  | -     | -    | -    | -     |
