# Supplementary material for: Transcriptome Sequencing Reveals Wide Expression Reprogramming of Basal and Unknown Genes in Leptospira biflexa Biofilms
Source: PubMed Central journal article supplement (PMC4863578; doi:10.1128/msphere.00042-16), 2016-04-06
Supplement: sph002162059st9.pdf [file sph002162059st9.pdf]

Table S7

**Table S7.** Annotation based on manual and structural curation.

| Protein  | Gene        | Annotation                                          |
|----------|-------------|-----------------------------------------------------|
| ABZ96159 | LEPBI_I0012 | DNA polymerase III, delta subunit                   |
| ABZ96159 | LEPBI_I0012 | DNA polymerase III, delta subunit                   |
| ABZ96192 | LEPBI_I0045 | Methyltransferase                                   |
| ABZ96198 | LEPBI_I0051 | Outer membrane peptidase                            |
| ABZ96213 | LEPBI_I0066 | Putative transcriptional repressor                  |
| ABZ96245 | LEPBI_I0098 | Surface layer protein                               |
| ABZ96246 | LEPBI_I0099 | Phosphodiesterase- biofilm                          |
| ABZ96252 | LEPBI_I0105 | UDP-glucose 4-epimerase                             |
| ABZ96257 | LEPBI_I0110 | Lipid binding protein                               |
| ABZ96259 | LEPBI_I0112 | Beta propeller fold                                 |
| ABZ96303 | LEPBI_I0158 | Signal recognition particle (ARN)                   |
| ABZ96320 | LEPBI_I0175 | Queuosine biosynthesis protein                      |
| ABZ96336 | LEPBI_I0191 | Lipid binding protein                               |
| ABZ96371 | LEPBI_I0226 | Putative thioesterase                               |
| ABZ96391 | LEPBI_I0246 | Alpha-beta hydrolase                                |
| ABZ96392 | LEPBI_I0247 | Thioredoxin fold; peroxiredoxin                     |
| ABZ96400 | LEPBI_I0255 | Outer membrane protein; cell-WALL attachment        |
| ABZ96405 | LEPBI_I0260 | Sensor histidine kinase                             |
| ABZ96420 | LEPBI_I0276 | Ribonuclease-like protein                           |
| ABZ96445 | LEPBI_I0301 | alpha-beta-barrel                                   |
| ABZ96461 | LEPBI_I0317 | tetratricopeptide repeats (TPR) containing protein  |
| ABZ96511 | LEPBI_I0368 | DINB/YFIT-like putative metalloenzyme fold          |
| ABZ96523 | LEPBI_I0381 | Alpha beta topology; metal transport                |
| ABZ96546 | LEPBI_I0404 | Metalloendopeptidase                                |
| ABZ96563 | LEPBI_I0421 | Tautomerase/dehalogenase                            |
| ABZ96591 | LEPBI_I0452 | Chaperone protein                                   |
| ABZ96627 | LEPBI_I0489 | Response regulator aspartate phosphatase            |
| ABZ96669 | LEPBI_I0531 | Metal-binding protein                               |
| ABZ96675 | LEPBI_I0537 | Permease YjgP/YjgQ family                           |
| ABZ96784 | LEPBI_I0651 | Putative periplasmic protease                       |
| ABZ96878 | LEPBI_I0746 | Aminoglycoside phosphotransferase                   |
| ABZ96899 | LEPBI_I0768 | Transmembrane oligosaccharyl transferase            |
| ABZ96912 | LEPBI_I0782 | Alpha/beta hydrolase family                         |
| ABZ96919 | LEPBI_I0789 | Citrate lyase; beta barrel                          |
| ABZ96937 | LEPBI_I0809 | Outer membrane lipoprotein                          |
| ABZ96983 | LEPBI_I0856 | Multidrug resistance protein outer membrane protein |
| ABZ96985 | LEPBI_I0858 | Lipase                                              |
| ABZ96986 | LEPBI_I0859 | Lipase; alpha-beta hydrolase fold                   |
| ABZ96987 | LEPBI_I0860 | Lipase                                              |
| ABZ97010 | LEPBI_I0885 | Lipase chaperone                                    |
| ABZ97081 | LEPBI_I0957 | DNA repair                                          |
| ABZ97112 | LEPBI_I0988 | Conserved lipoprotein LPS cell-WALL                 |
| ABZ97202 | LEPBI_I1081 | Diguanylate cyclase; biofilm                        |
| ABZ97256 | LEPBI_I1139 | flavoprotein- FAD/NADP-binding rossmann fold        |
| ABZ97362 | LEPBI_I1250 | Glutamine cyclotransferase                          |
| ABZ97437 | LEPBI_I1327 | Anti sigma factor FlgM                              |
| ABZ97464 | LEPBI_I1354 | Transcriptional regulator                           |
| ABZ97465 | LEPBI_I1355 | Thioesterase superfamily                            |
| ABZ97541 | LEPBI_I1433 | Phospholipase C; membrane/calcium binding           |
| ABZ97630 | LEPBI_I1523 | RNA binding protein                                 |

Table S7

|          |             |                                                     |
|----------|-------------|-----------------------------------------------------|
| ABZ97791 | LEPBI_I1684 | PilO protein                                        |
| ABZ97830 | LEPBI_I1724 | Alpha/beta hydrolase fold - probable esterase       |
| ABZ97855 | LEPBI_I1749 | Alpha-beta sandwich; hydrolase                      |
| ABZ97888 | LEPBI_I1782 | Lojap-like protein                                  |
| ABZ97911 | LEPBI_I1805 | Probable two-component response regulator           |
| ABZ97925 | LEPBI_I1819 | AdoMet dependent methyltransferase                  |
| ABZ97928 | LEPBI_I1822 | Cell-binding factor 2; SURA-like, chaperone         |
| ABZ97936 | LEPBI_I1830 | lipid binding protein                               |
| ABZ97950 | LEPBI_I1844 | Putative ABC transporter permease                   |
| ABZ98095 | LEPBI_I1993 | Transmembrane oligosaccharyl transferase            |
| ABZ98172 | LEPBI_I2070 | Inner membrane Glycoside hydrolase family 9         |
| ABZ98229 | LEPBI_I2127 | Alpha/beta hydrolase                                |
| ABZ98239 | LEPBI_I2137 | SAM-dependent methyltransferase                     |
| ABZ98276 | LEPBI_I2177 | Probable surface protein                            |
| ABZ98285 | LEPBI_I2186 | Intramembrane protease                              |
| ABZ98312 | LEPBI_I2214 | probable outer membrane protein                     |
| ABZ98335 | LEPBI_I2239 | Transcriptional repressor                           |
| ABZ98404 | LEPBI_I2309 | periplasmic antiviral protein                       |
| ABZ98407 | LEPBI_I2312 | Metal ION transporter; CBS domain                   |
| ABZ98443 | LEPBI_I2352 | Sensor histidine kinase                             |
| ABZ98462 | LEPBI_I2371 | Plasmid partition protein                           |
| ABZ98474 | LEPBI_I2384 | LEMA protein; bromodomain-like fold                 |
| ABZ98487 | LEPBI_I2397 | Coiled-coil; cell division                          |
| ABZ98603 | LEPBI_I2518 | Phospho-lipase                                      |
| ABZ98607 | LEPBI_I2523 | TonB protein; beta-hairpin; transporter             |
| ABZ98611 | LEPBI_I2527 | TCS - Sensor Histidine Kinase                       |
| ABZ98614 | LEPBI_I2530 | DNA replication and repair                          |
| ABZ98615 | LEPBI_I2531 | ParB/Sulfiredoxin fold                              |
| ABZ98642 | LEPBI_I2561 | Putative nucleotide-diphospho-sugar transferase     |
| ABZ98673 | LEPBI_I2594 | Outer membrane assembly lipoprotein YFIO            |
| ABZ98749 | LEPBI_I2671 | Chondroitin ABC lyase                               |
| ABZ98771 | LEPBI_I2693 | Putative RNA polymerase                             |
| ABZ98783 | LEPBI_I2705 | Carboxyl methyltransferase; membrane protein        |
| ABZ98788 | LEPBI_I2710 | Histone fold protein                                |
| ABZ98895 | LEPBI_I2820 | Transcriptional regulator                           |
| ABZ98899 | LEPBI_I2824 | Choline-binding protein                             |
| ABZ98900 | LEPBI_I2825 | Periplasmic/cell wall glycoside hydrolase           |
| ABZ98902 | LEPBI_I2828 | Antibiotic resistance                               |
| ABZ98905 | LEPBI_I2834 | Acetyltransferase                                   |
| ABZ98945 | LEPBI_I2876 | Diguanylate cyclase; zinc sensor; biofilm           |
| ABZ98975 | LEPBI_I2906 | DNA double-strand break repair                      |
| ABZ99004 | LEPBI_I2935 | Transcriptional regulator                           |
| ABZ99033 | LEPBI_I2965 | glycosyl transferase                                |
| ABZ99054 | LEPBI_I2987 | DNA-directed RNA polymerase subunit alpha           |
| ABZ99113 | LEPBI_I3047 | Sensor-type histidine kinase                        |
| ABZ99214 | LEPBI_I3149 | Outer membrane; OMPA-like fold cell-WALL attachment |
| ABZ99279 | LEPBI_I3214 | Chaperone                                           |
| ABZ99355 | LEPBI_I3290 | Intramembrane protease                              |
| ABZ99363 | LEPBI_I3298 | Outer membrane phosphate-porin                      |
| ABZ99399 | LEPBI_I3335 | Zinc peptidase; alpha/beta barrel                   |
| ABZ99412 | LEPBI_I3348 | Pyrrolo-quinoline quinone                           |
| ABZ99413 | LEPBI_I3349 | Sensor histidine kinase                             |
| ABZ99423 | LEPBI_I3359 | Ankyrin repeat family protein                       |

Table S7

|          |              |                                                      |
|----------|--------------|------------------------------------------------------|
| ABZ99425 | LEPBI_I3361  | Ankyrin repeat family protein                        |
| ABZ99435 | LEPBI_I3371  | Glutathionylspermidine synthase                      |
| ABZ99483 | LEPBI_I3422  | Transcriptional regulator; biofilm                   |
| ABZ99514 | LEPBI_I3454  | DTDP sugar isomerase                                 |
| ABZ99552 | LEPBI_II0014 | Membrane protein                                     |
| ABZ99561 | LEPBI_II0023 | Probable protease HTPX homolog; heat shock protein   |
| ABZ99570 | LEPBI_II0032 | Putative signal transduction protein                 |
| ABZ99573 | LEPBI_II0035 | ATP-NAD kinase                                       |
| ABZ99577 | LEPBI_II0039 | TETR-family transcriptional regulator                |
| ABZ99578 | LEPBI_II0040 | Diacylglycerol kinase                                |
| ABZ99603 | LEPBI_II0065 | RNA binding protein                                  |
| ABZ99608 | LEPBI_II0070 | toxin-like protein                                   |
| ABZ99625 | LEPBI_II0088 | PilZ domain                                          |
| ABZ99636 | LEPBI_II0100 | Multidrug transporter                                |
| ABZ99637 | LEPBI_II0101 | RNA polymerase sigma factor                          |
| ABZ99645 | LEPBI_II0109 | Probable metalloproteinase                           |
| ABZ99673 | LEPBI_II0138 | Viral-like DNA integrase                             |
| ABZ99676 | LEPBI_II0141 | Membrane protein; signal transduction                |
| ABZ99684 | LEPBI_II0149 | Phospholipase/carboxylesterase                       |
| ABZ99695 | LEPBI_II0160 | Methyl-accepting chemotaxis protein                  |
| ABZ99709 | LEPBI_II0174 | Transmembrane Cation efflux system protein           |
| ABZ99725 | LEPBI_II0192 | Glyoxalase/bleomycin resistance protein/dioxygenase  |
| ABZ99743 | LEPBI_II0210 | Carboxyl methyltransferase; membrane protein         |
| ABZ99753 | LEPBI_II0220 | Porin/ outer membrane                                |
| ABZ99759 | LEPBI_II0226 | Cell WALL hydrolase                                  |
| ABZ99768 | LEPBI_II0235 | Sulfate permease family protein                      |
| ABZ99781 | LEPBI_II0248 | Chaperone                                            |
| ABZ99783 | LEPBI_II0250 | Putative lipoprotein                                 |
| ABZ99795 | LEPBI_II0262 | sialic acid metabolism- kelch repeat- beta-propeller |
| ABZ99796 | LEPBI_II0263 | Sialic acid metabolism; kelch repeat                 |
| ABZ99804 | LEPBI_II0271 | Nitrogen regulatory protein P-II                     |
| ABZ99809 | LEPBI_II0276 | Lipase/acylhydrolase                                 |
| ABZ99820 | LEPBI_p0006  | Putative thioesterase                                |
| ABZ99823 | LEPBI_p0009  | Alpha-beta protein                                   |
| ABZ99839 | LEPBI_p0025  | Pyrrolo-quinoline quinone                            |
| ABZ99844 | LEPBI_p0030  | Cysteine peptidase                                   |
| ABZ99846 | LEPBI_p0032  | Catabolism of external DNA                           |
| ABZ99854 | LEPBI_p0042  | Alpha-beta protein                                   |
| ABZ99857 | LEPBI_p0045  | Cation efflux system protein                         |
| ABZ99861 | LEPBI_p0049  | Prevent HOST death protein                           |
| ABZ99862 | LEPBI_p0050  | Putative ribonuclease                                |

---
